# Supplementary material for: Prognostic association supports indexing size measures in echocardiography by body surface area
Source: PubMed Central journal article supplement (PMC10632399; doi:10.1038/s41598-023-46183-z), 2023-11-08
Supplement: 41598_2023_46183_MOESM1_ESM.pdf [file 41598_2023_46183_MOESM1_ESM.pdf]

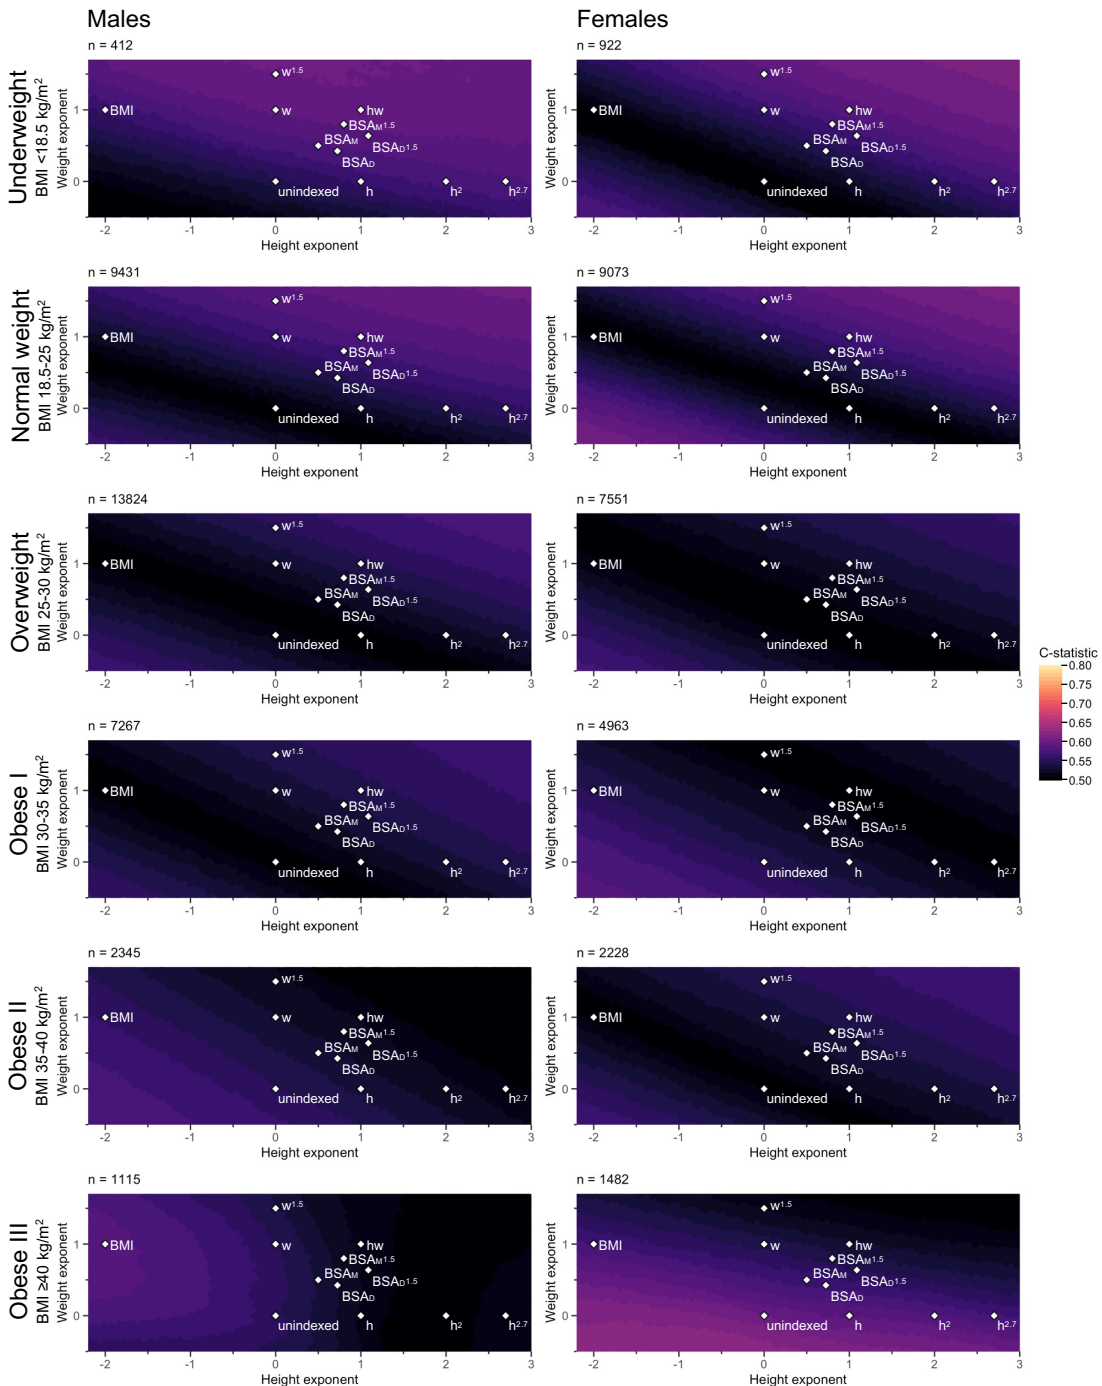

**Supplementary Figure 1. Average prognostic strength of indexing for body size in aorta for different BMI categories and sex groups.**

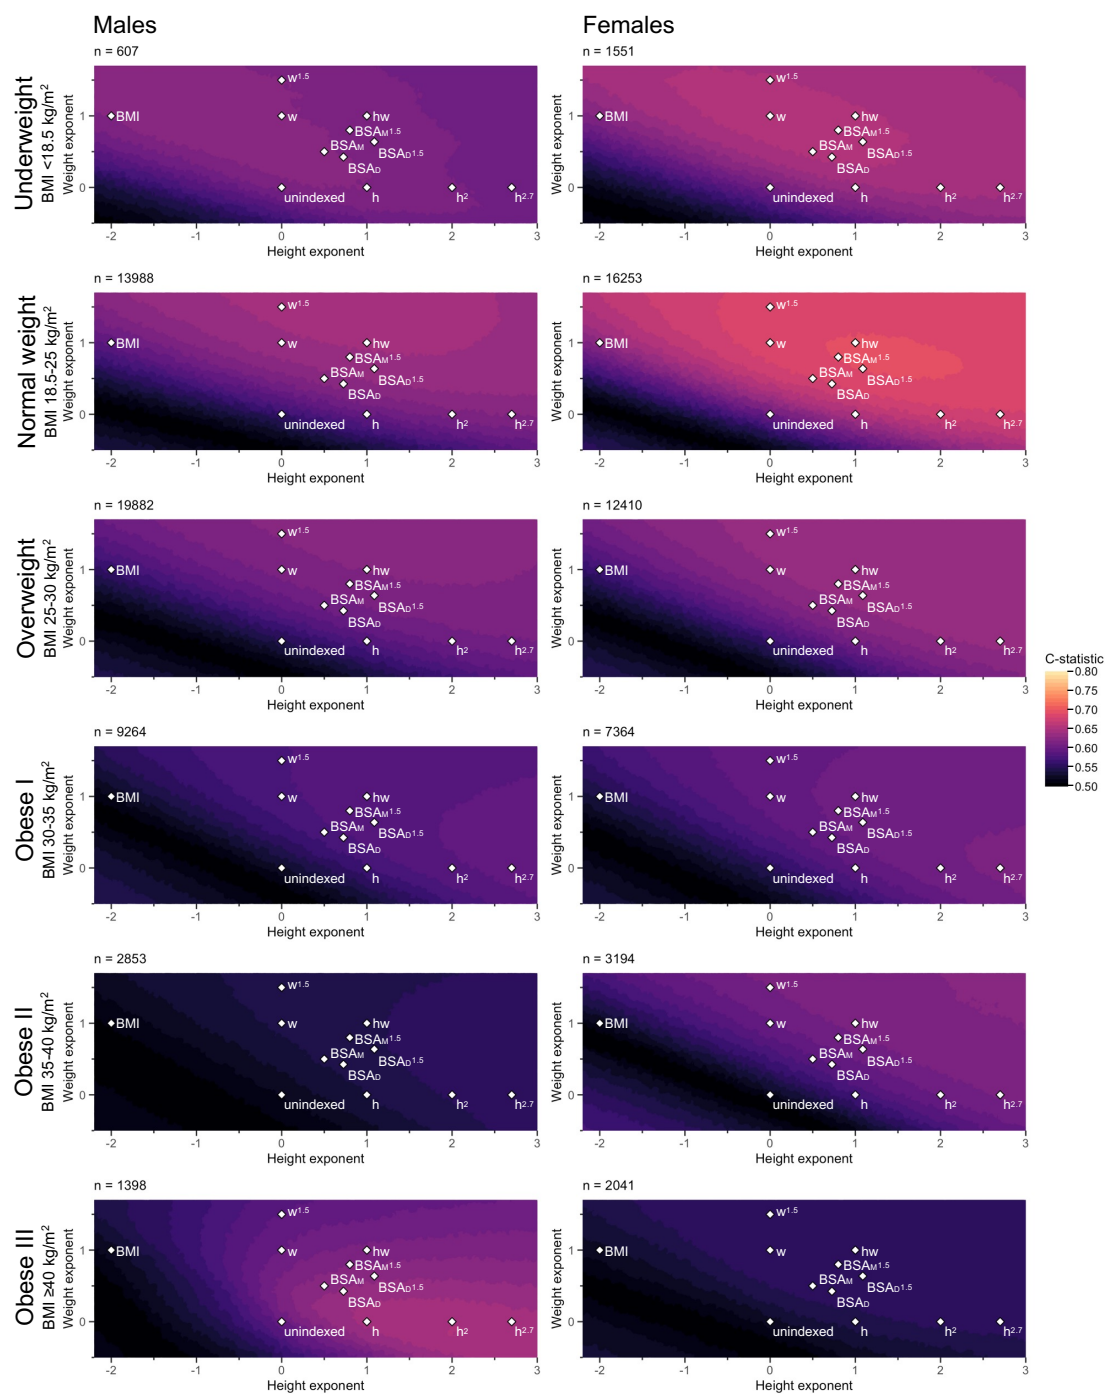

**Supplementary Figure 2.** Average prognostic strength of indexing for body size in aortic sinus diameter.

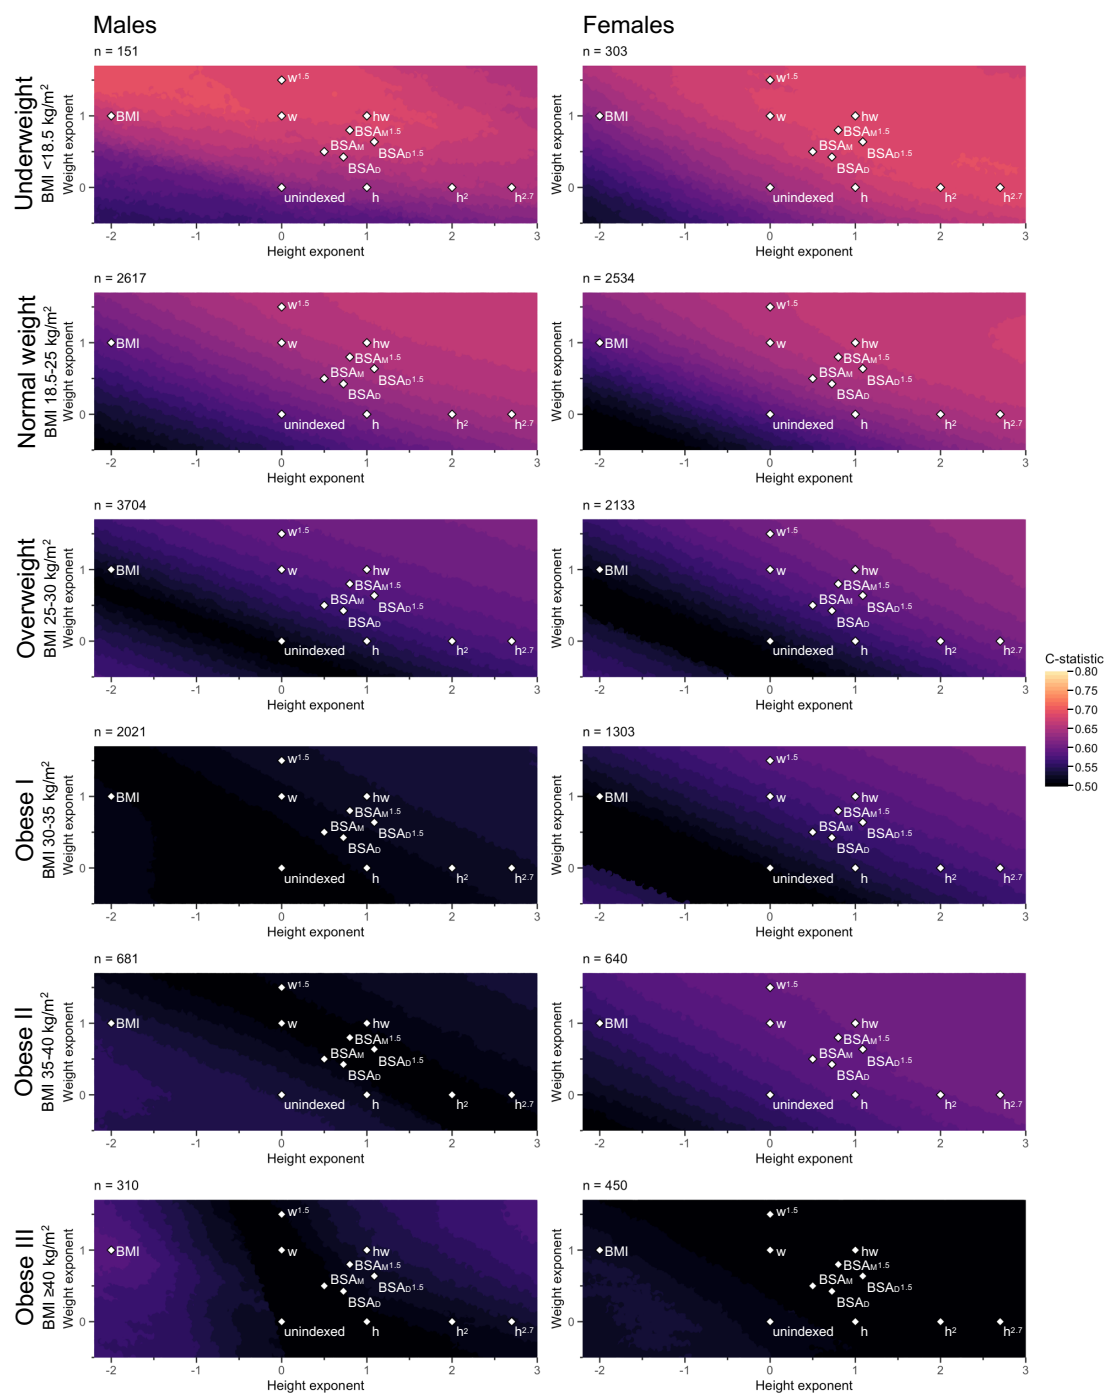

**Supplemental Figure 3.** Average prognostic strength of indexing for body size in aortic arch diameter.

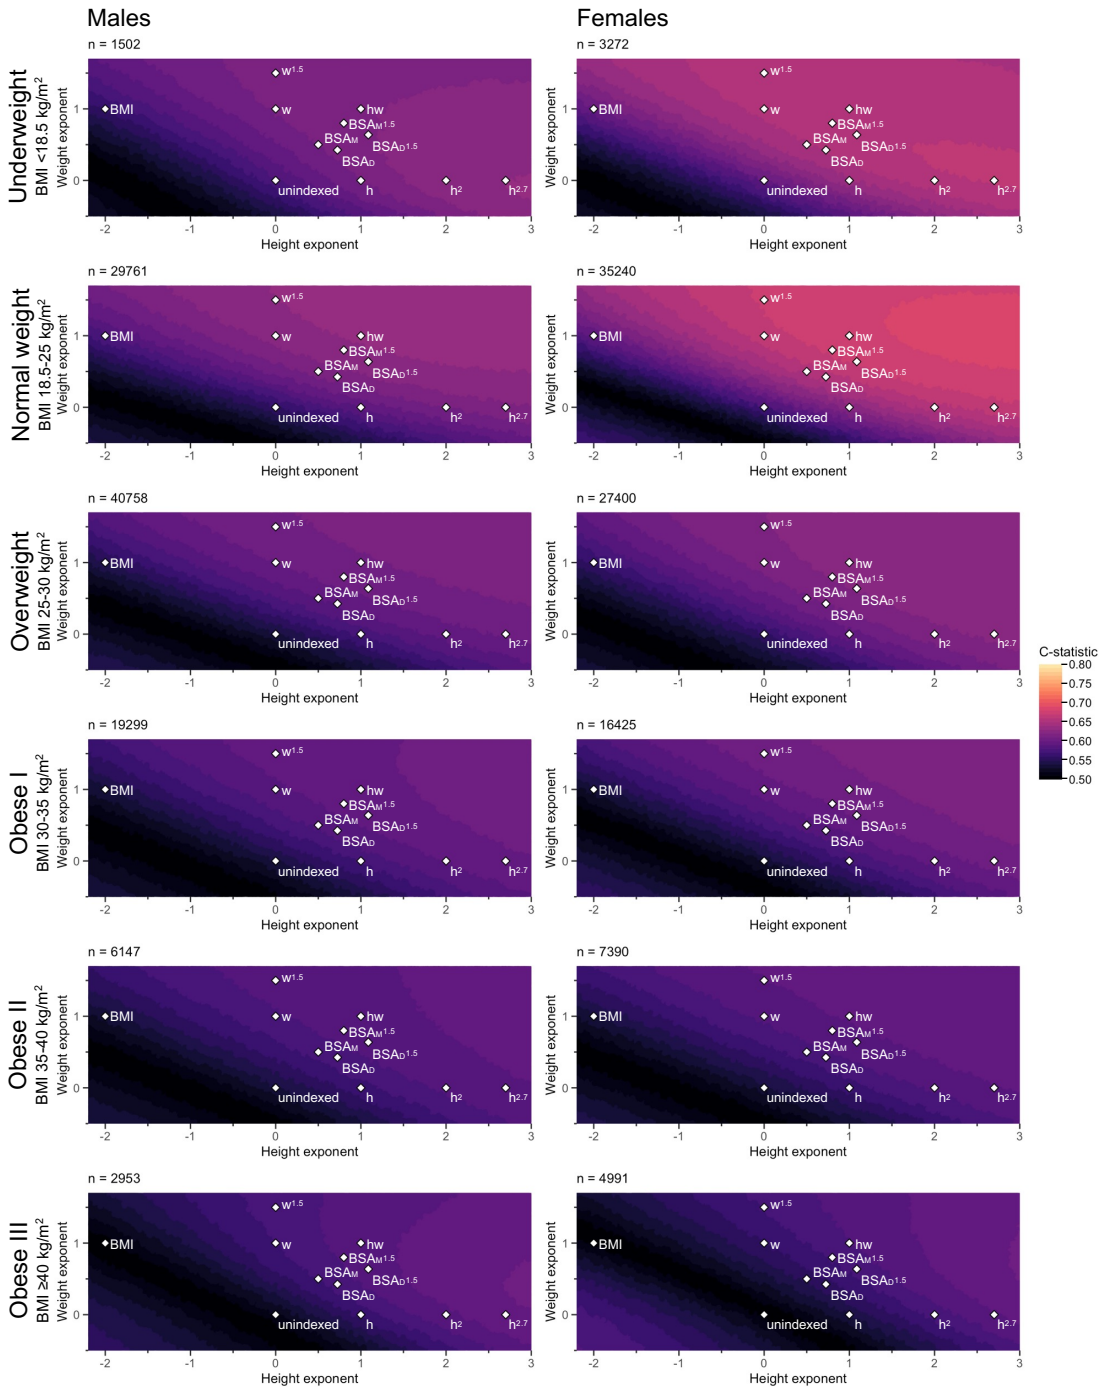

**Supplementary Figure 4.** Average prognostic strength of indexing for body size in aortic root diameter.

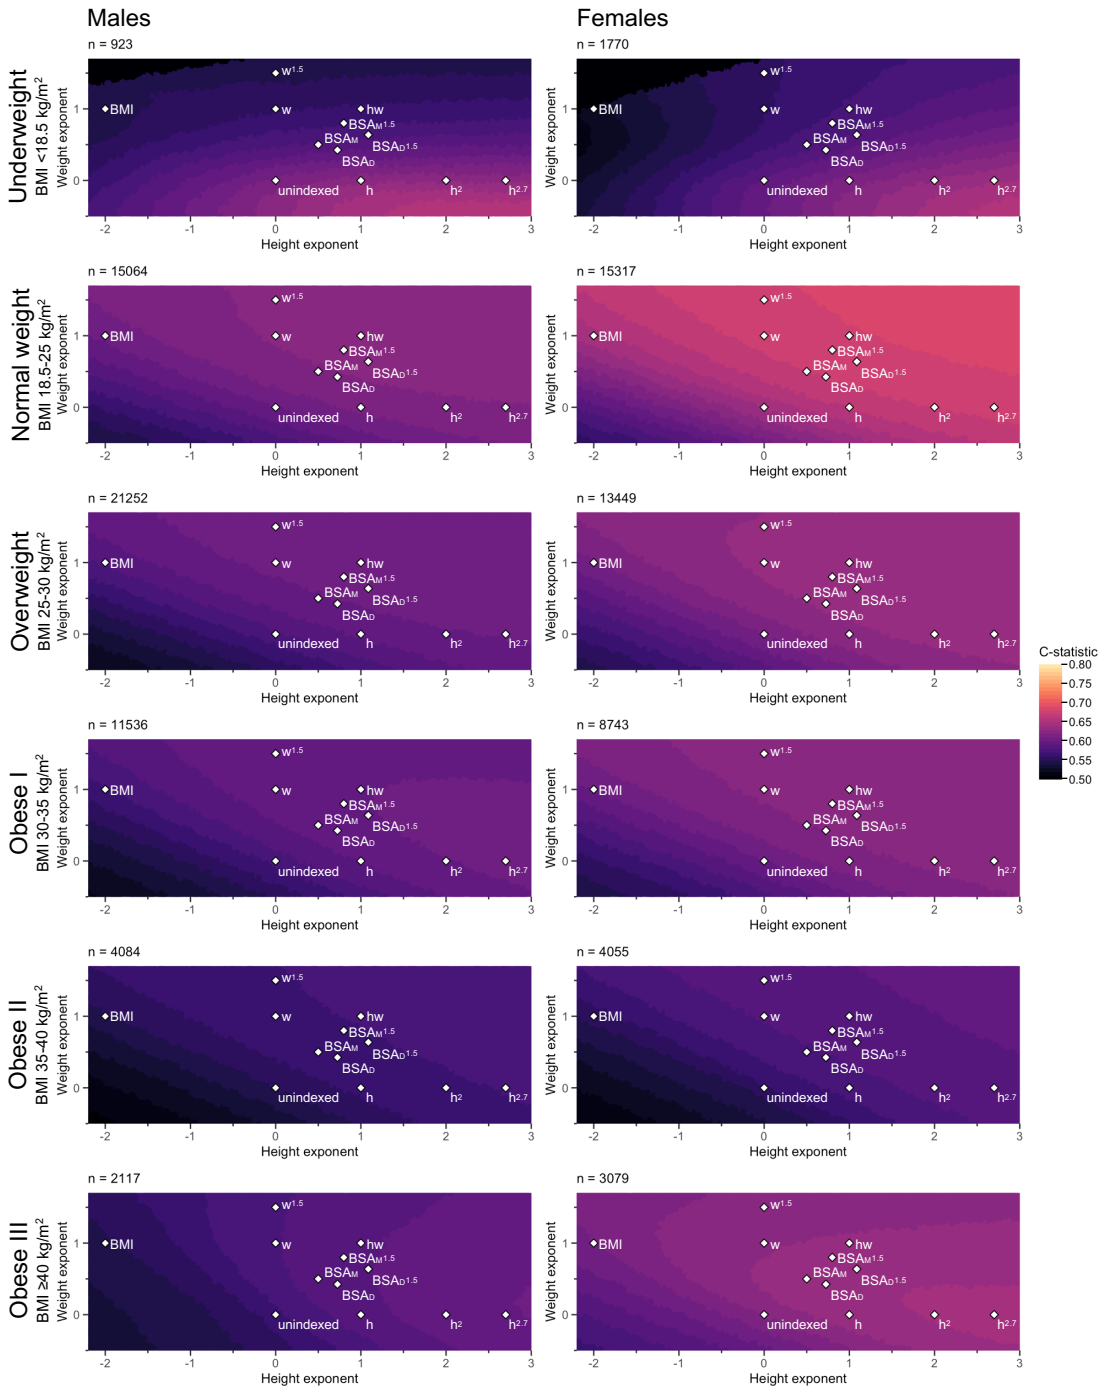

**Supplementary Figure 5.** Average prognostic strength of indexing for body size in ascending aorta diameter.



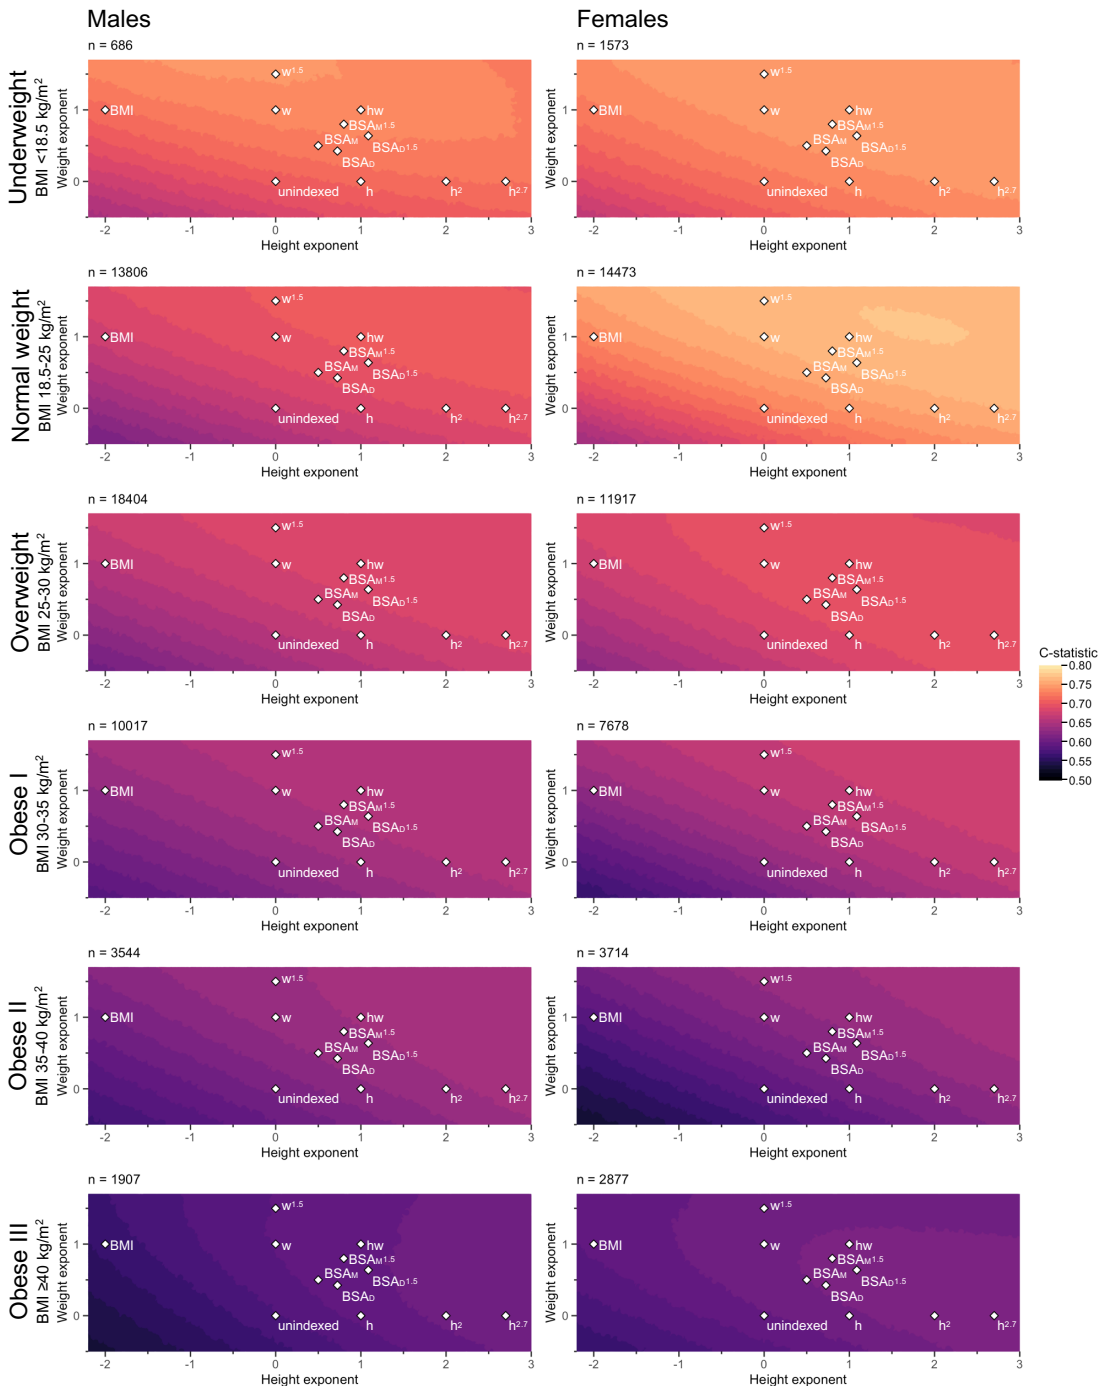

**Supplementary Figure 7.** Average prognostic strength of indexing for body size in LA area.

**Males**

**Females**

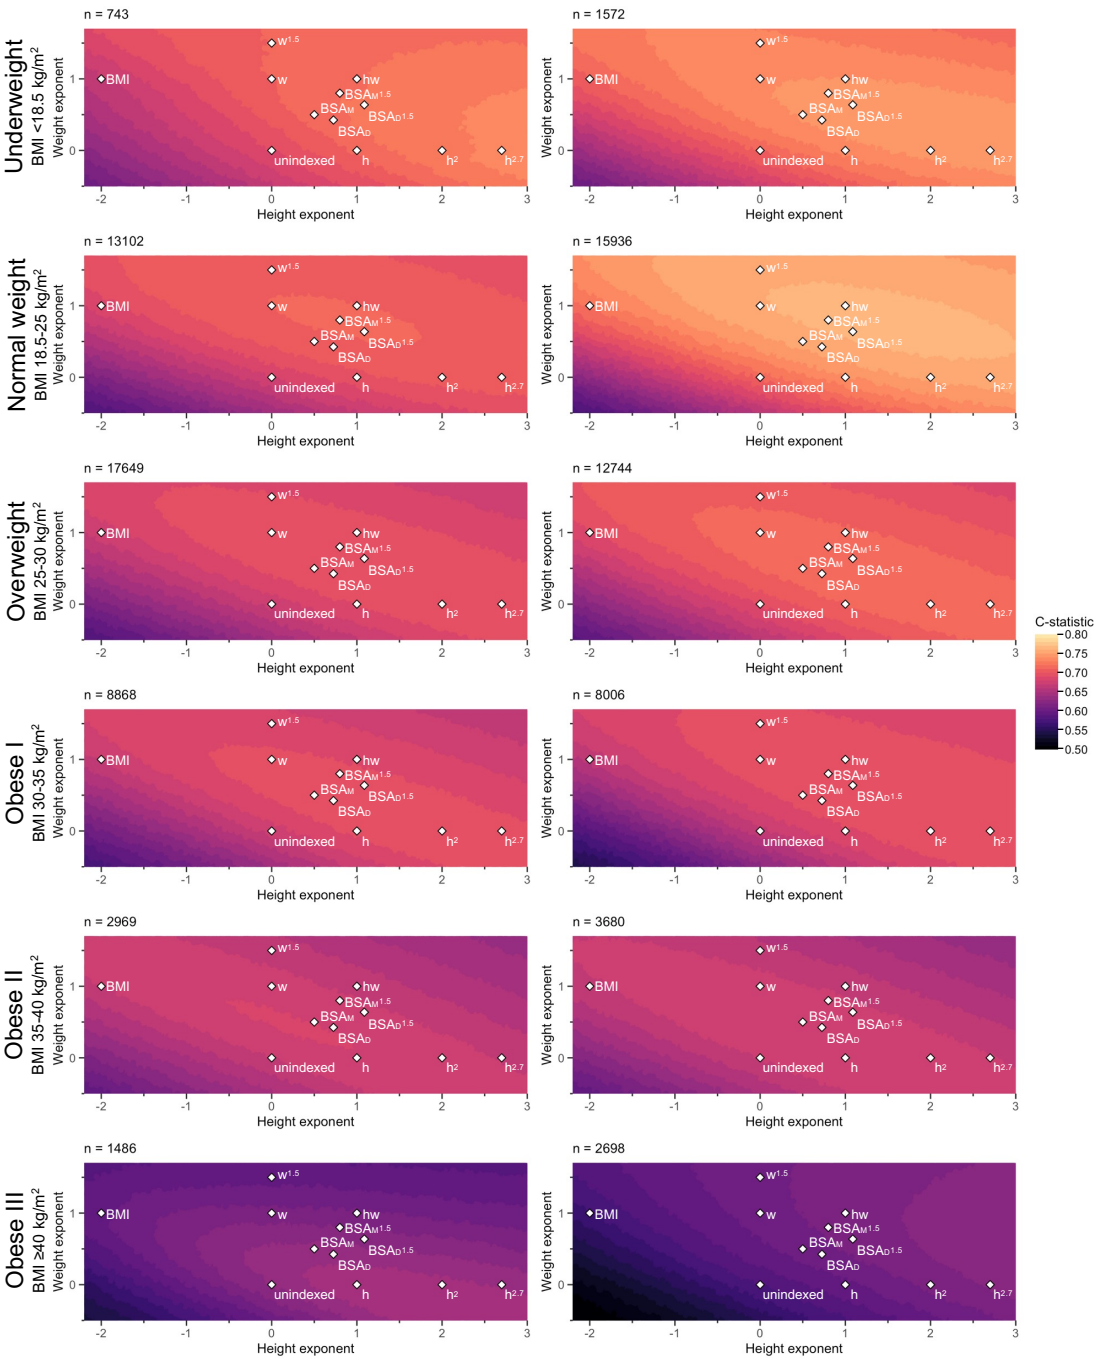

**Supplementary Figure 8.** Average prognostic strength of indexing for body size in LA diameter.



**Males**

**Females**

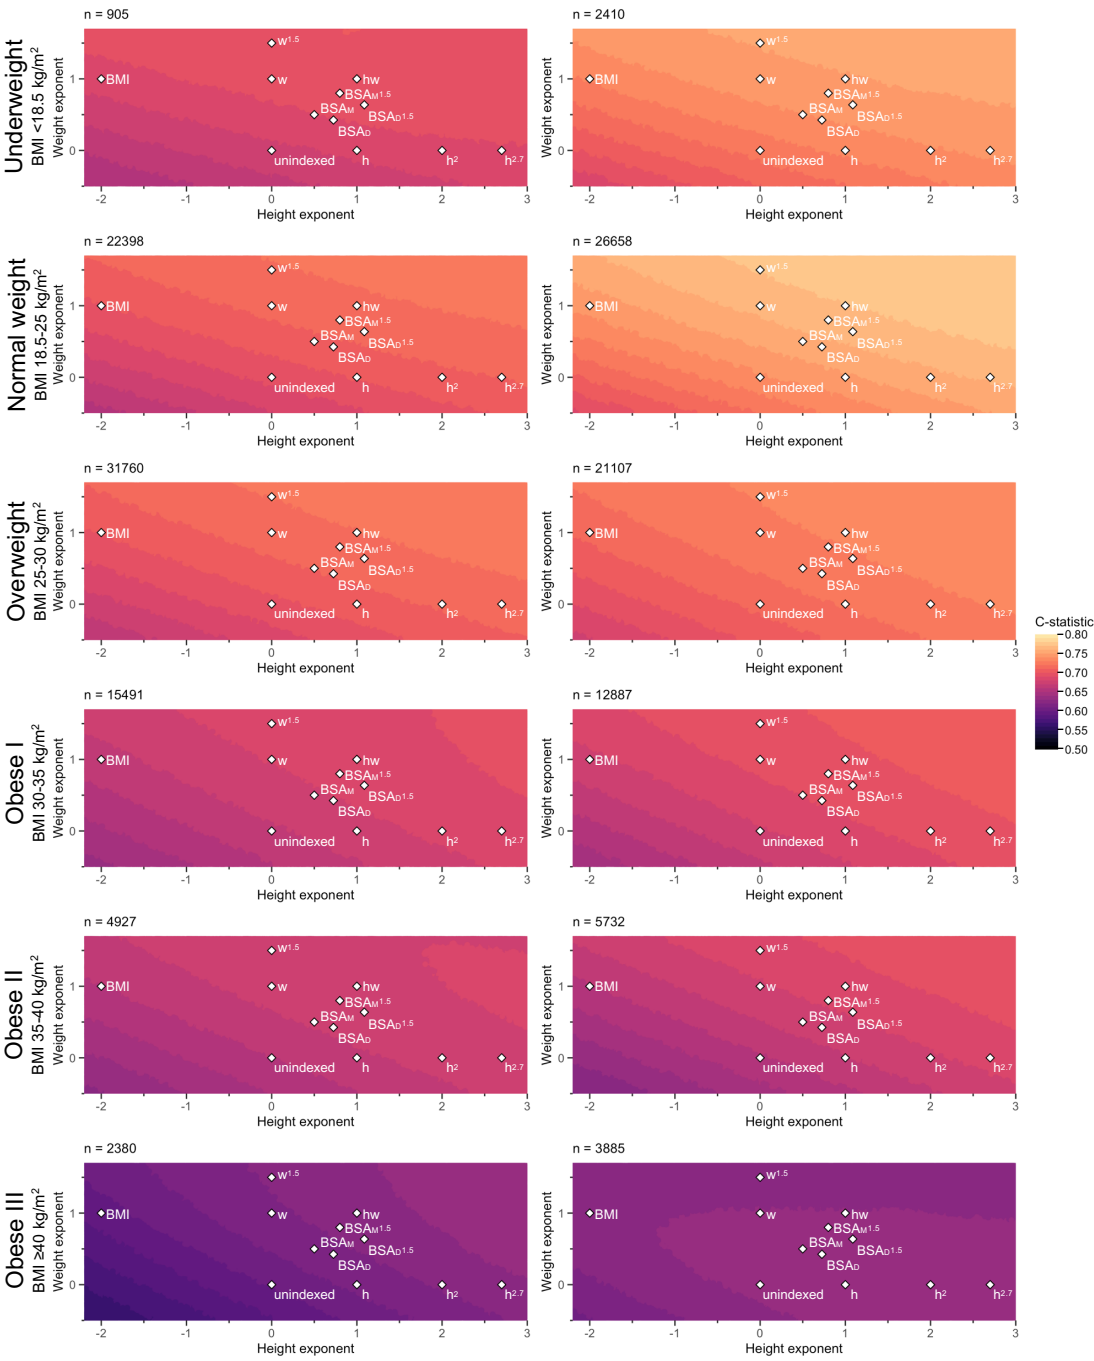

**Supplementary Figure 9.** Average prognostic strength of indexing for body size in LA volume.

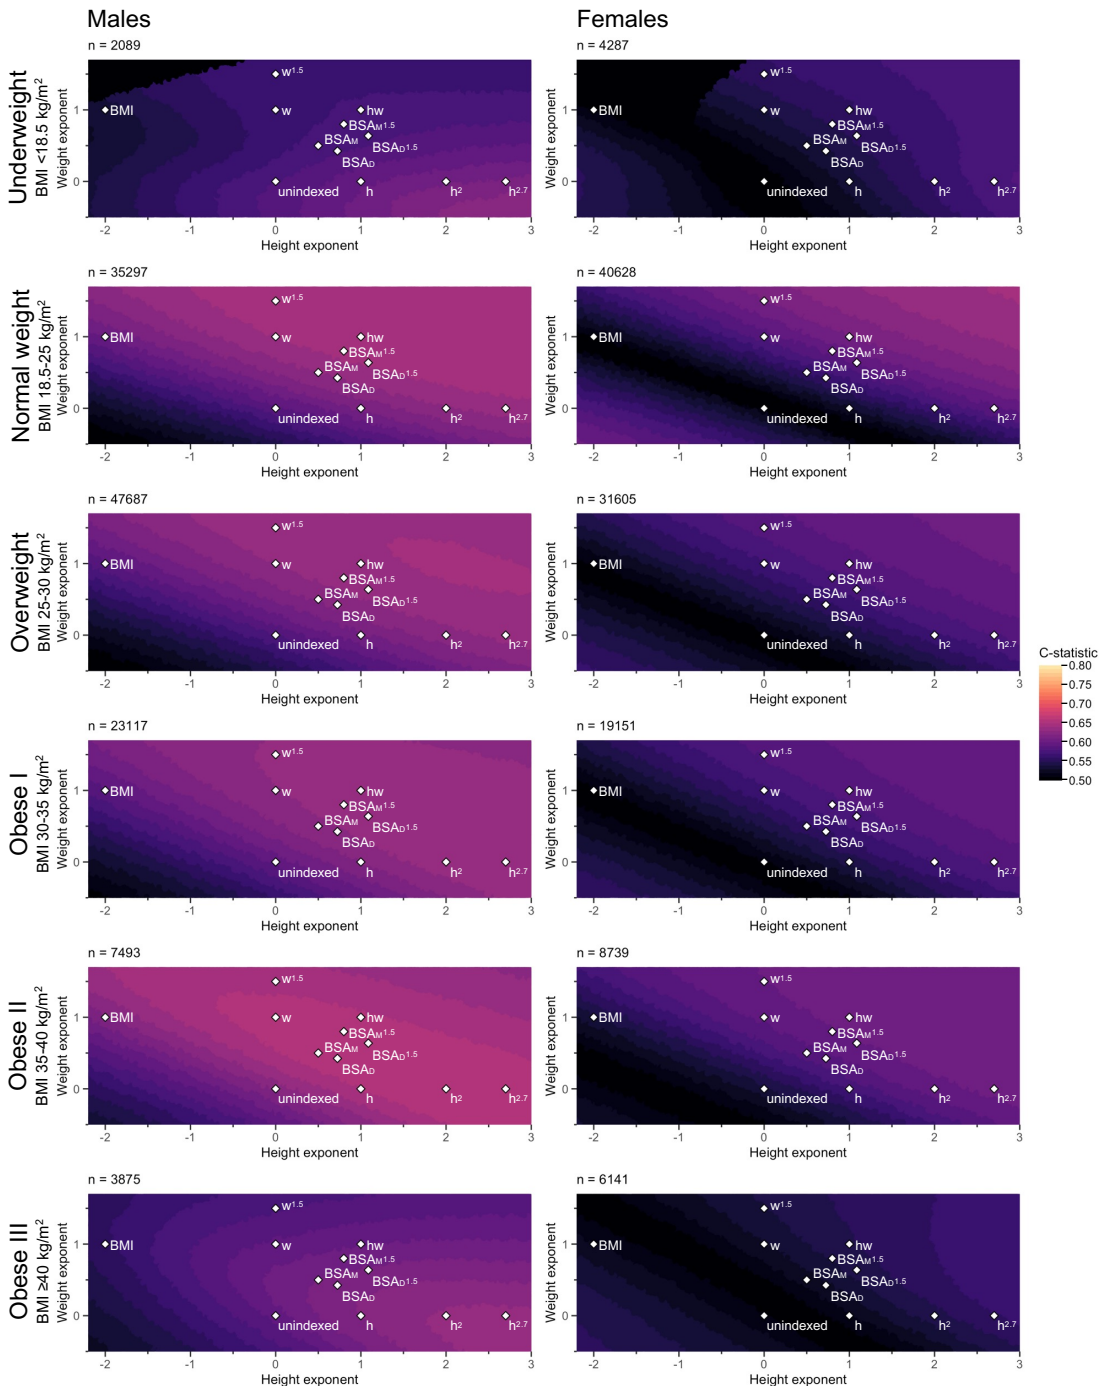

**Supplementary Figure 10.** Average prognostic strength of indexing for body size in LV end-diastolic

diameter.

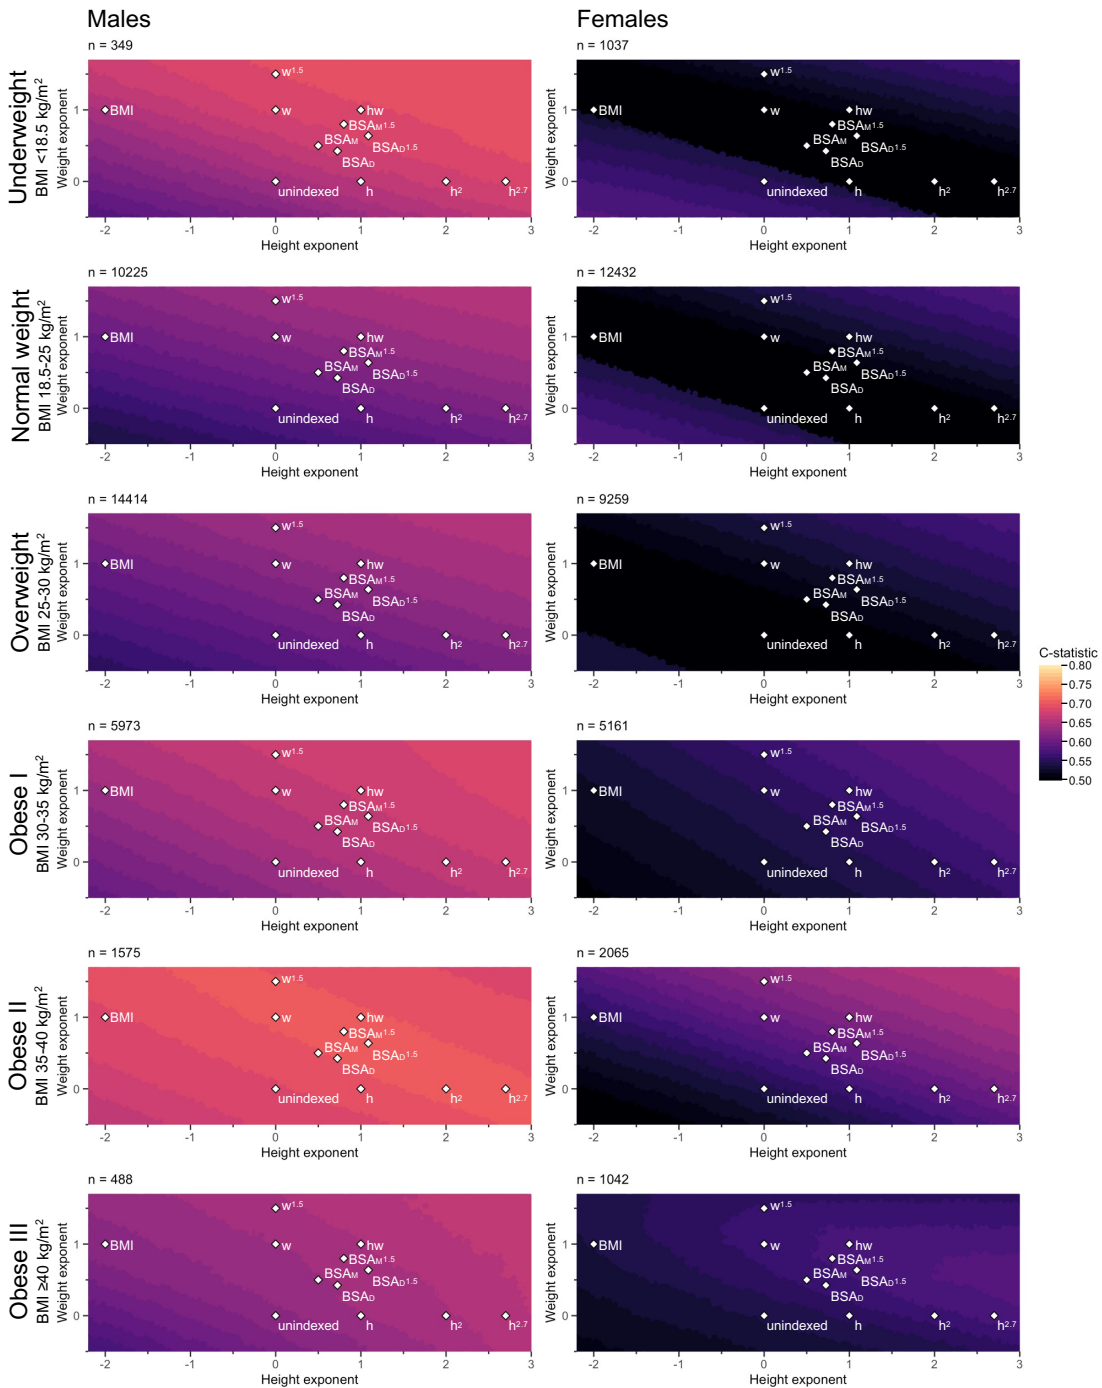

**Supplementary Figure 11. Average prognostic strength of indexing for body size in LV end-diastolic volume.**

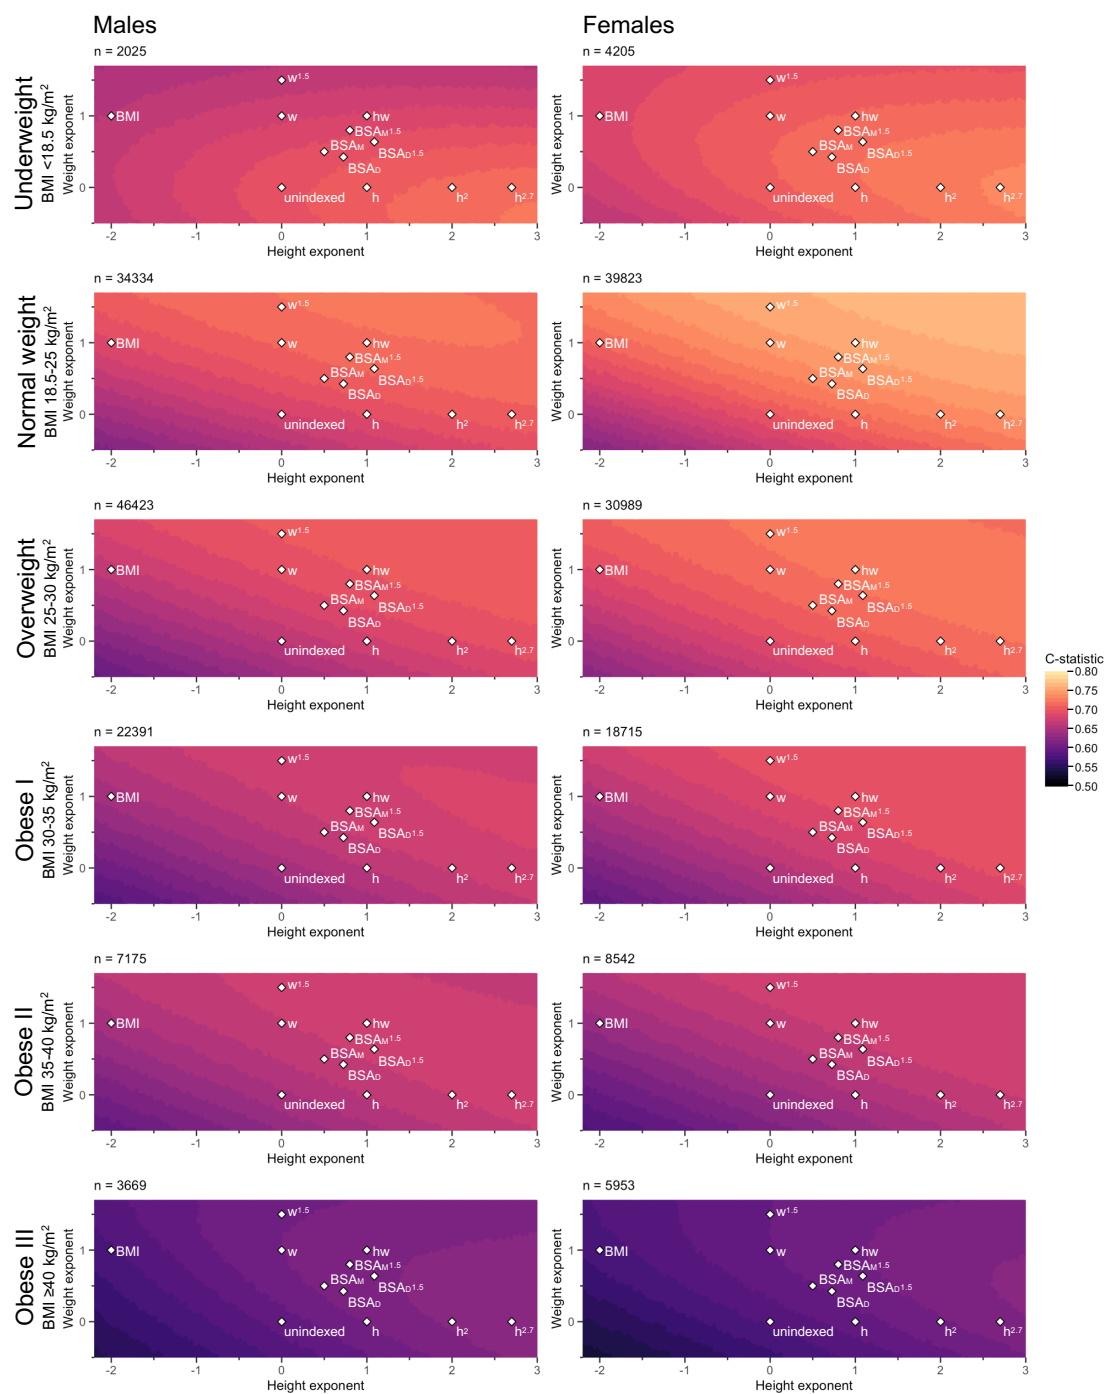

**Supplementary Figure 12.** Average prognostic strength of indexing for body size in LV mass.

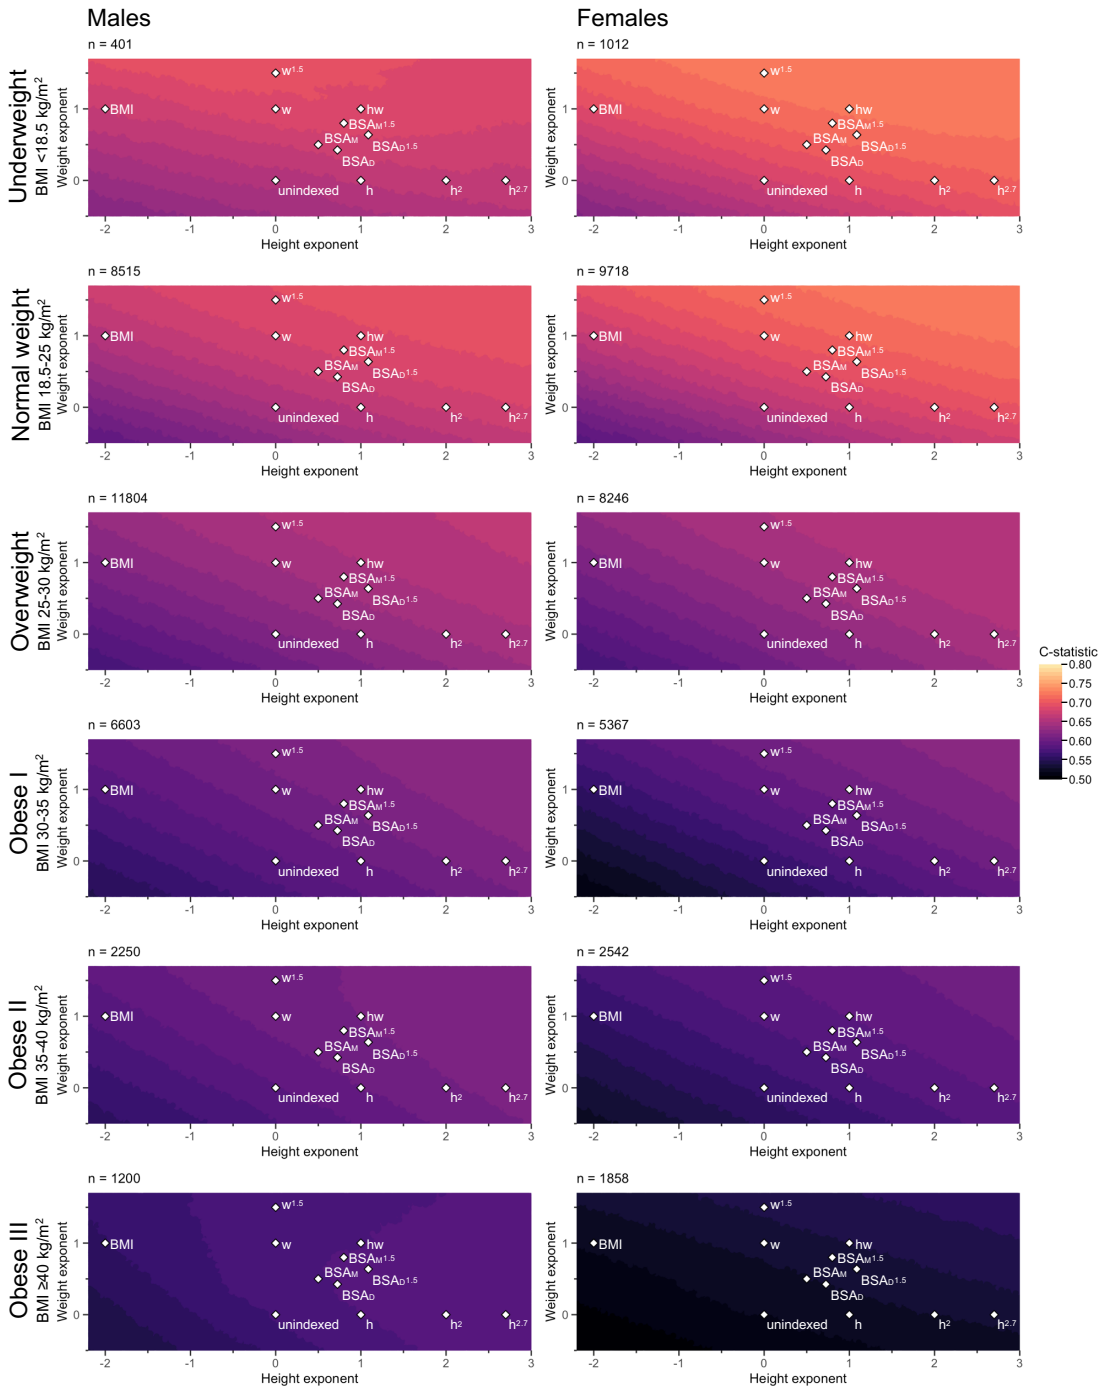

**Supplementary Figure 13.** Average prognostic strength of indexing for body size in RA area.



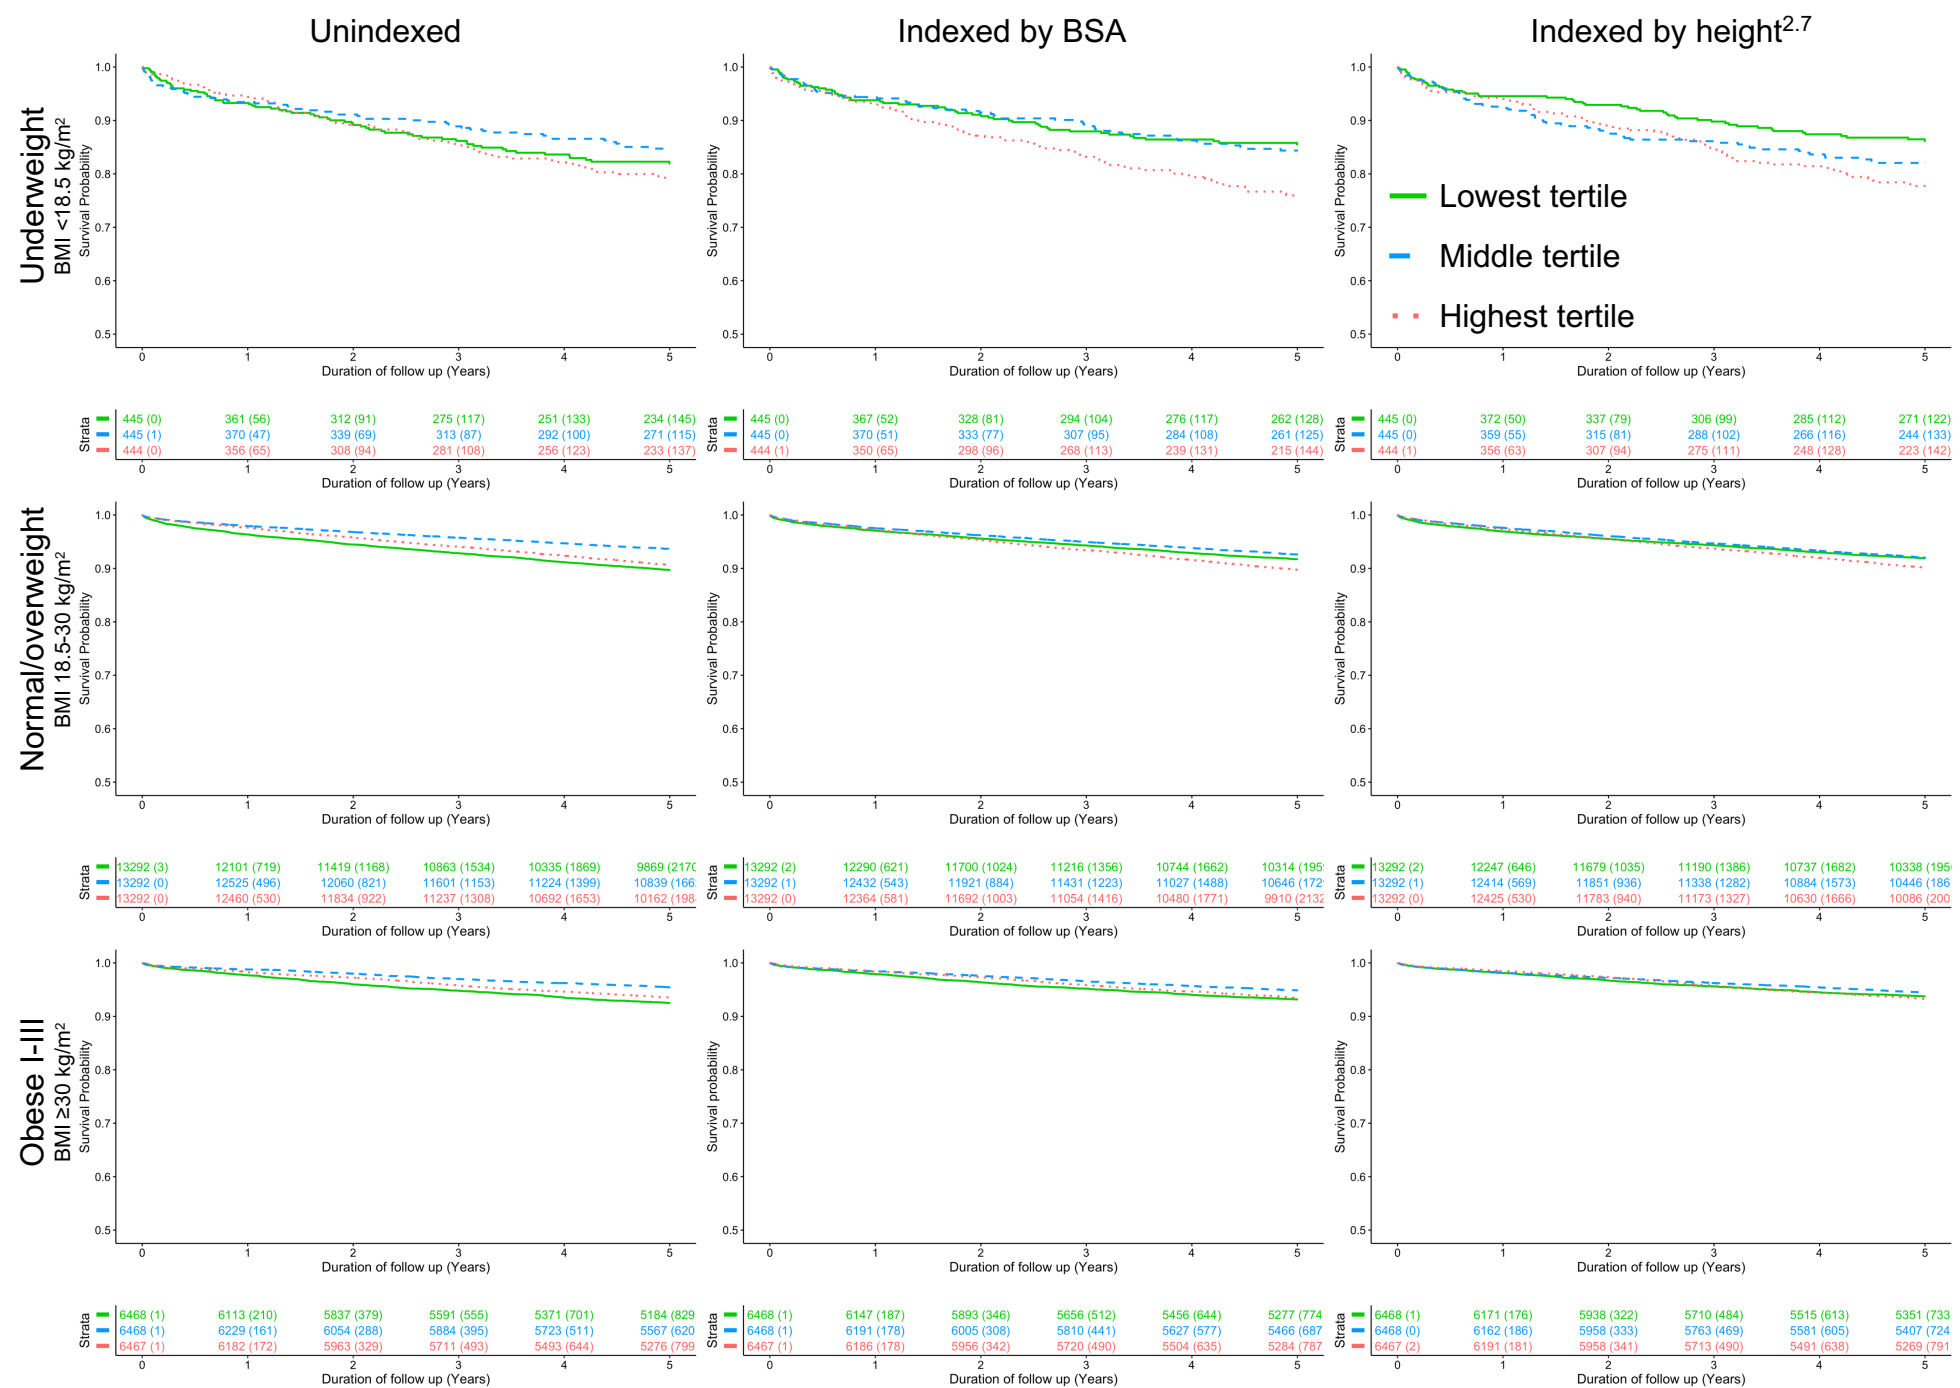

**Supplementary Figure 15.** Kaplan-Meier curves for 5-year cardiovascular mortality for aorta at sinotubular diameter unindexed, indexed by BSA and indexed by height<sup>2.7</sup>.

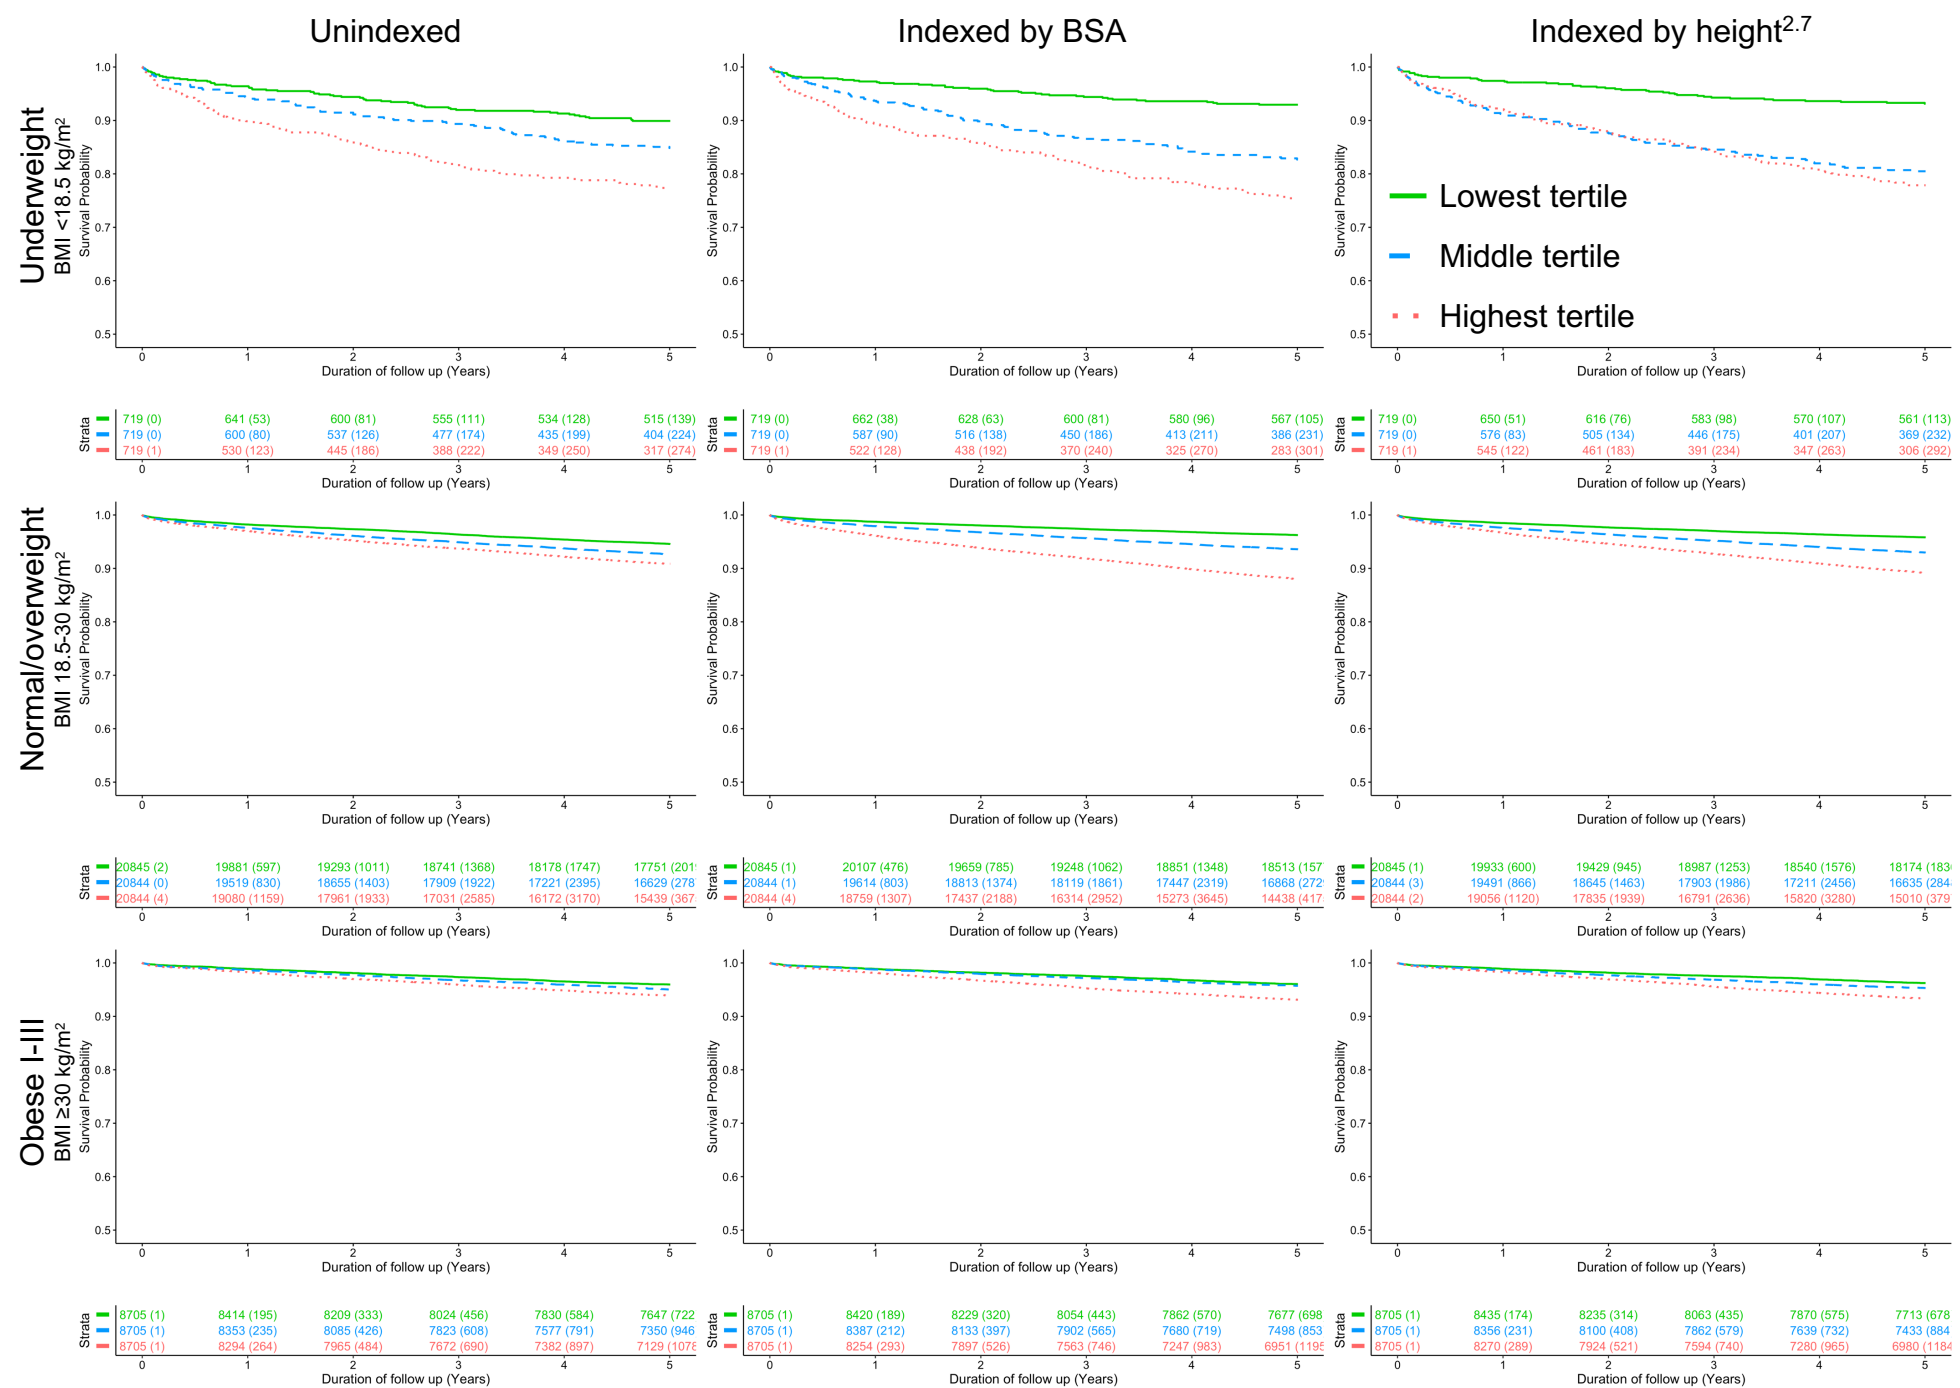

**Supplementary Figure 16.** Kaplan-Meier curves for 5-year cardiovascular mortality for aortic sinus diameter unindexed, indexed by BSA and indexed by height<sup>2.7</sup>.



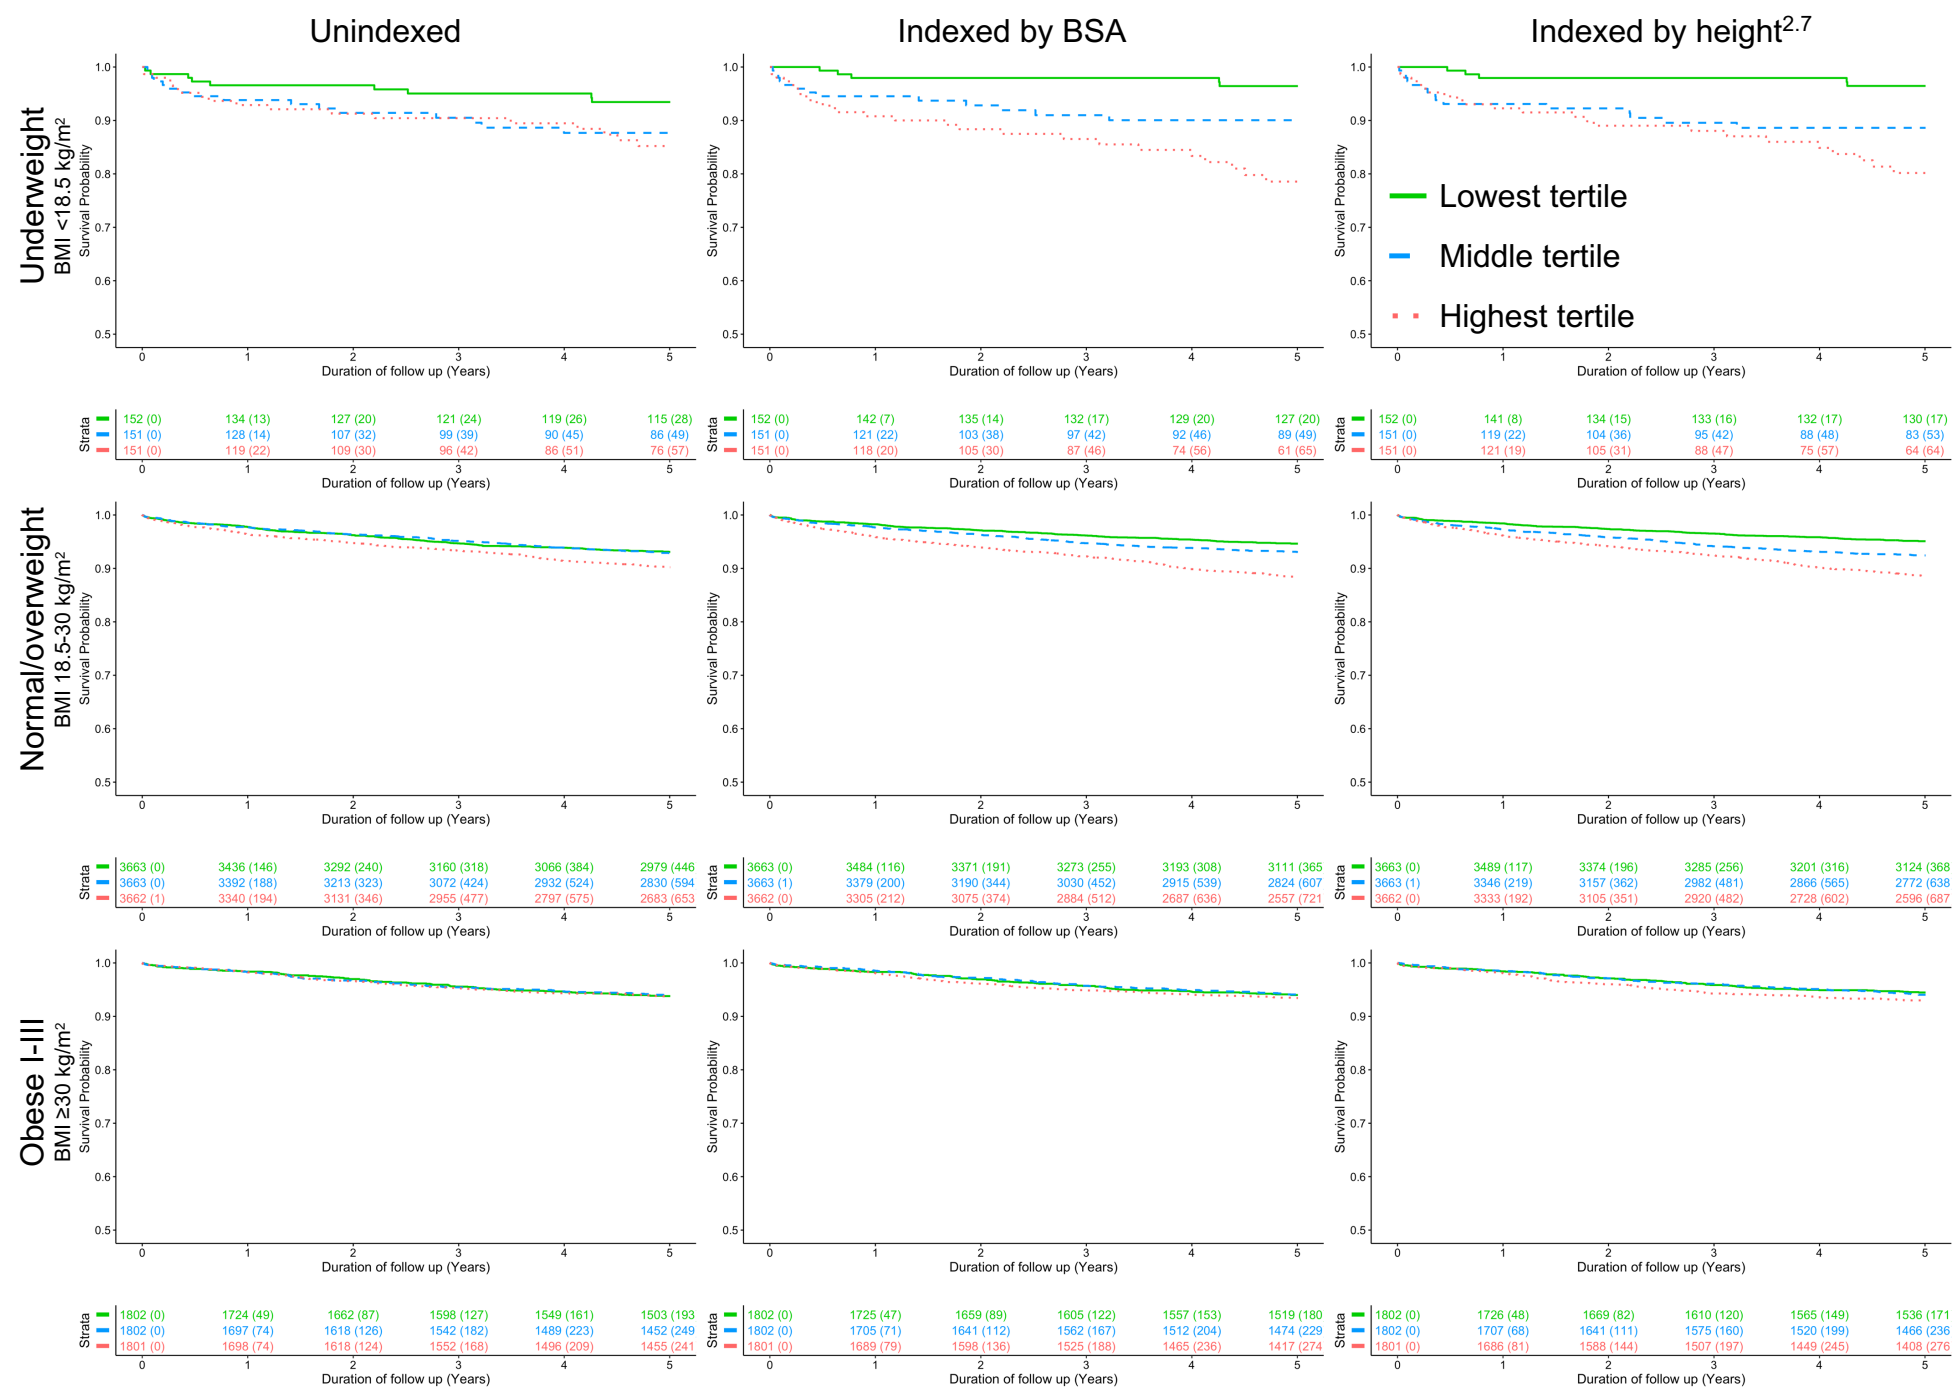

**Supplementary Figure 17.** Kaplan-Meier curves for 5-year cardiovascular mortality for aortic arch diameter unindexed, indexed by BSA and indexed by height<sup>2.7</sup>.

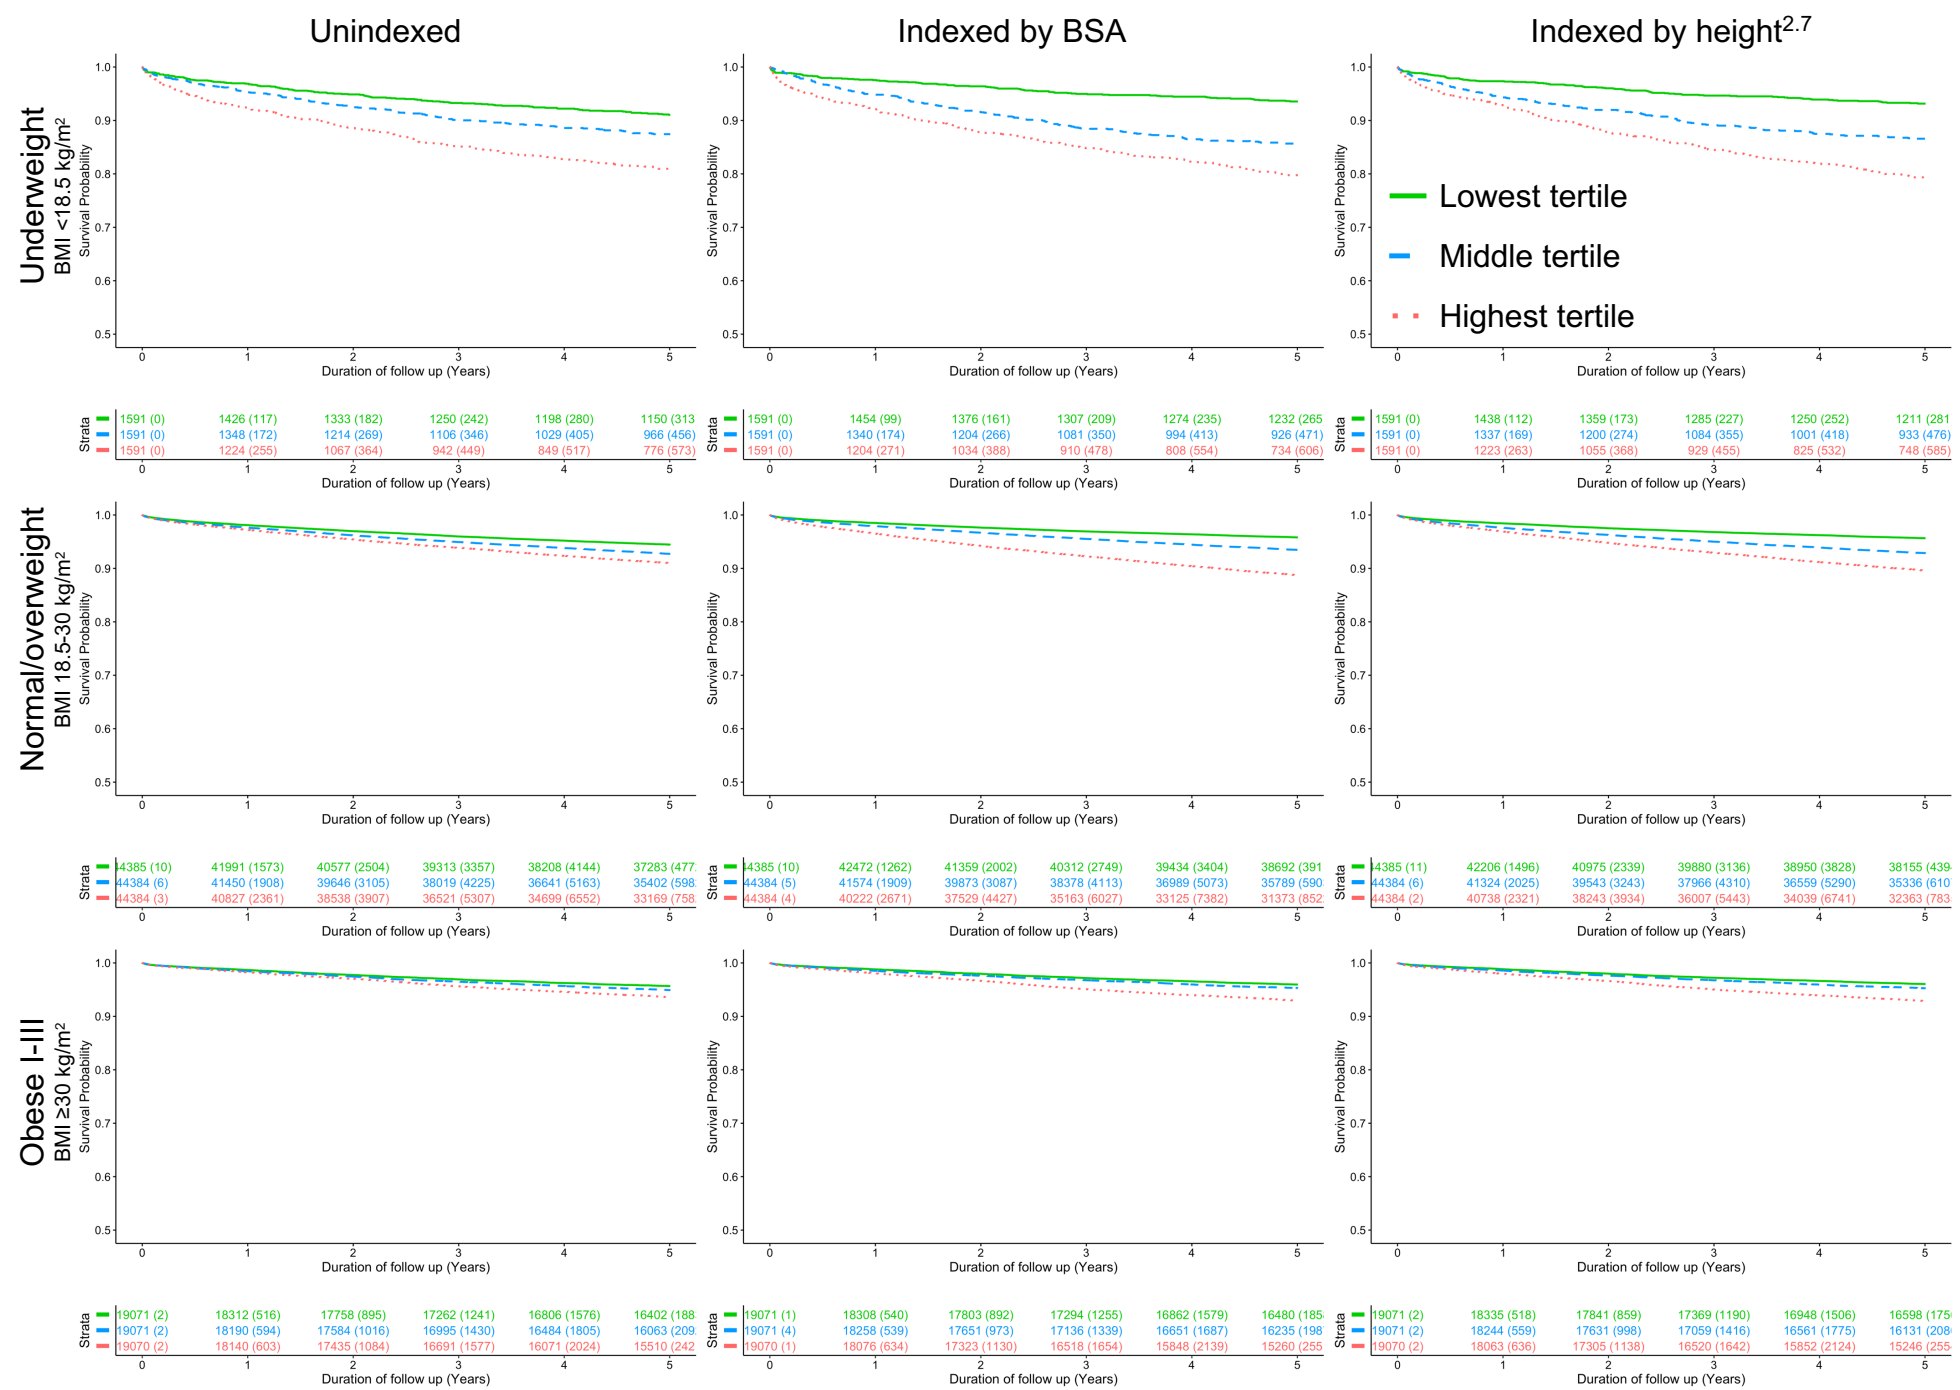

**Supplementary Figure 18.** Kaplan-Meier curves for 5-year cardiovascular mortality for aortic root diameter unindexed, indexed by BSA and indexed by height<sup>2.7</sup>.

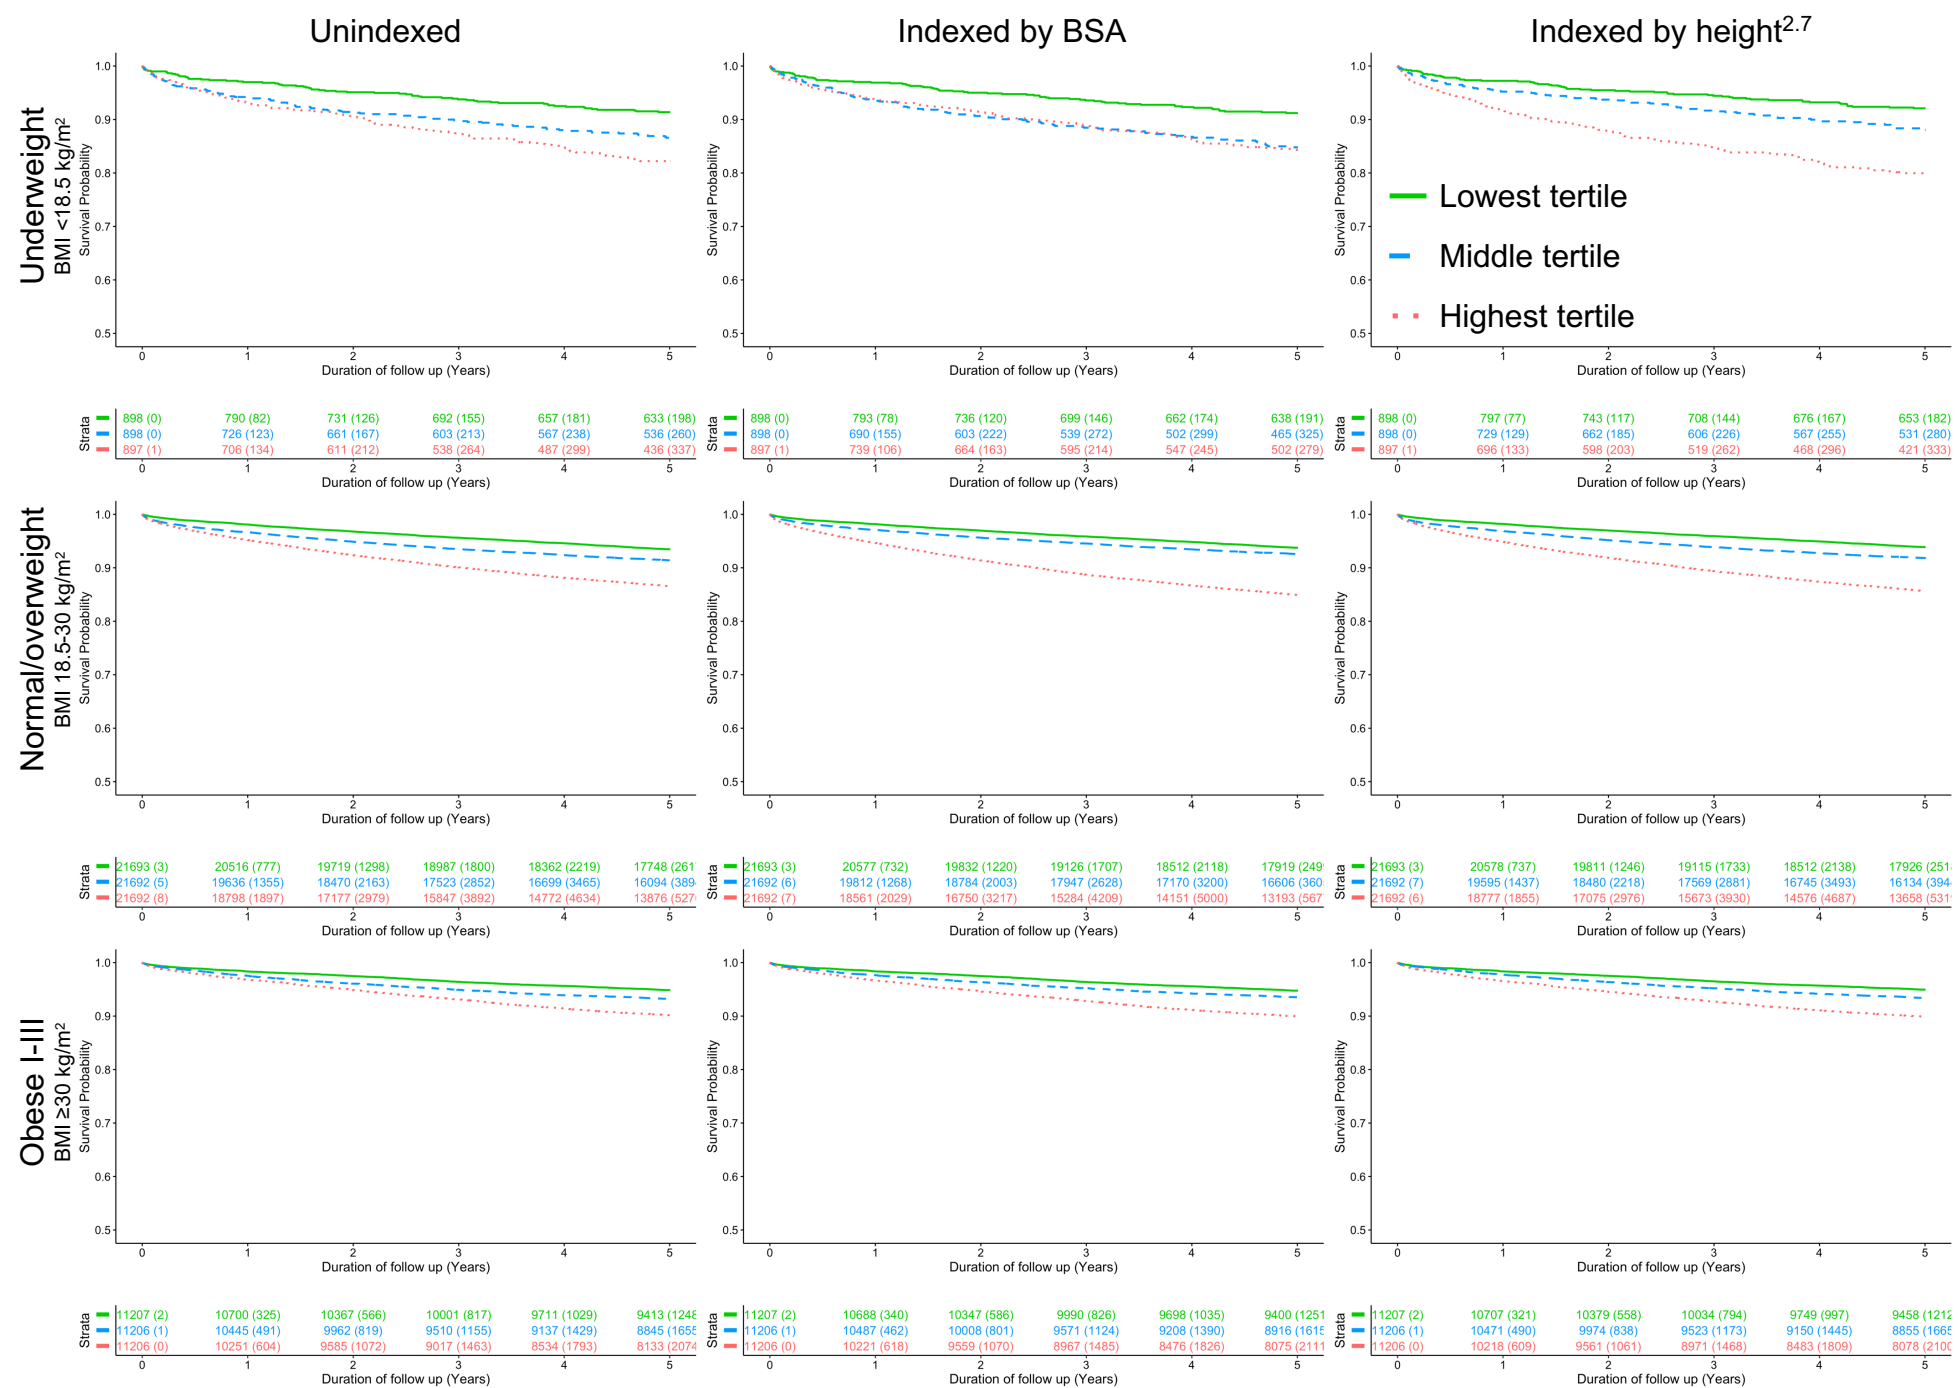

**Supplementary Figure 19.** Kaplan-Meier curves for 5-year cardiovascular mortality for ascending aorta diameter unindexed, indexed by BSA and indexed by height<sup>2.7</sup>.

### Unindexed

### Indexed by BSA

### Indexed by height<sup>2.7</sup>

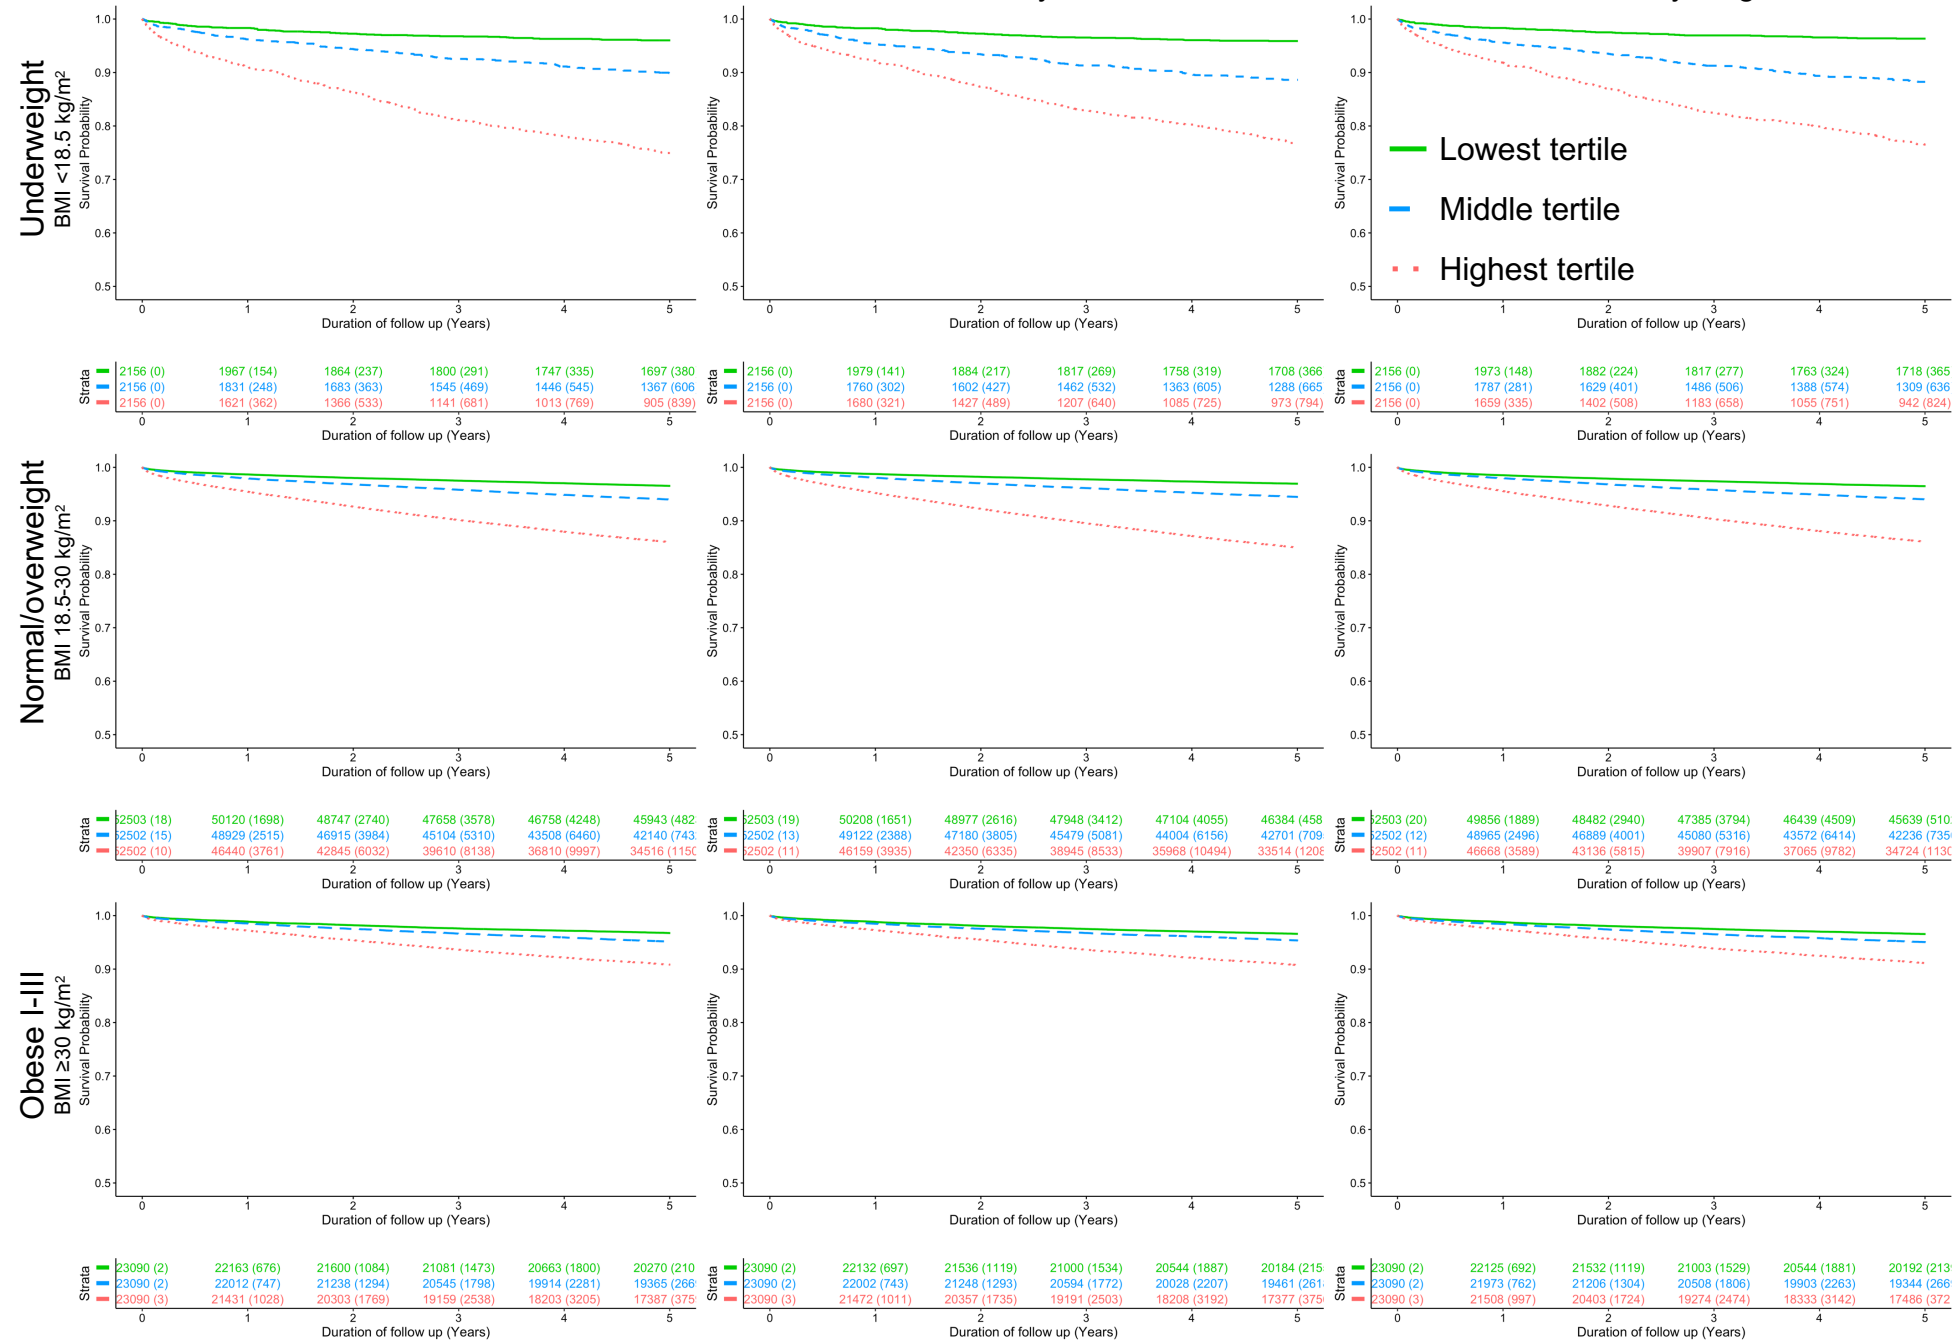

**Supplementary Figure 20.** Kaplan-Meier curves for 5-year cardiovascular mortality for IVS thickness unindexed, indexed by BSA and indexed by height<sup>2.7</sup>.

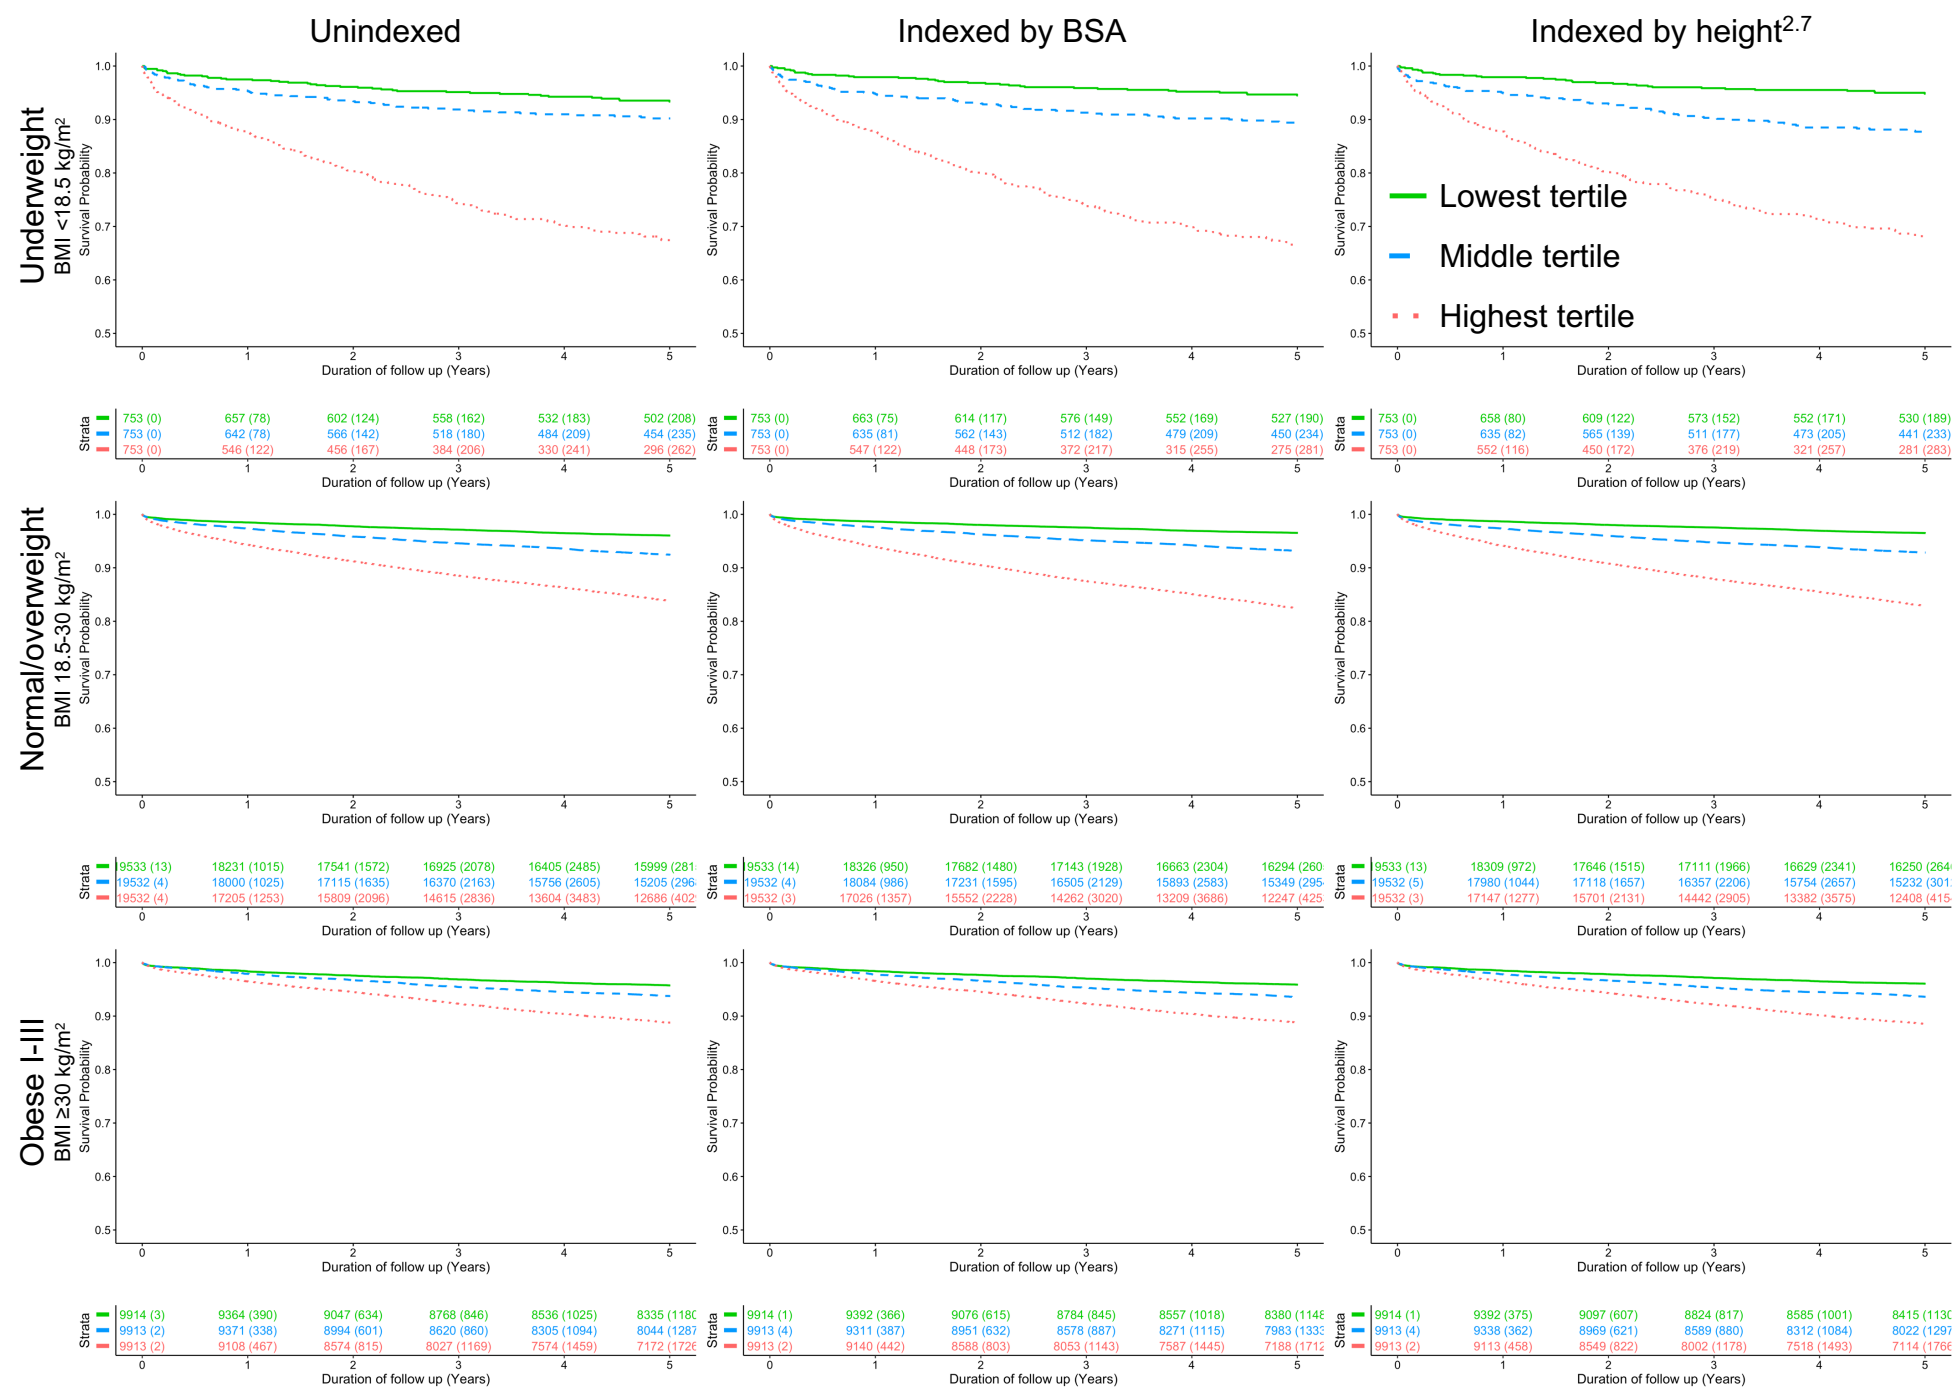

Supplementary Figure 21. Kaplan-Meier curves for 5-year cardiovascular mortality for LA area unindexed, indexed by BSA and indexed by height<sup>2.7</sup>.

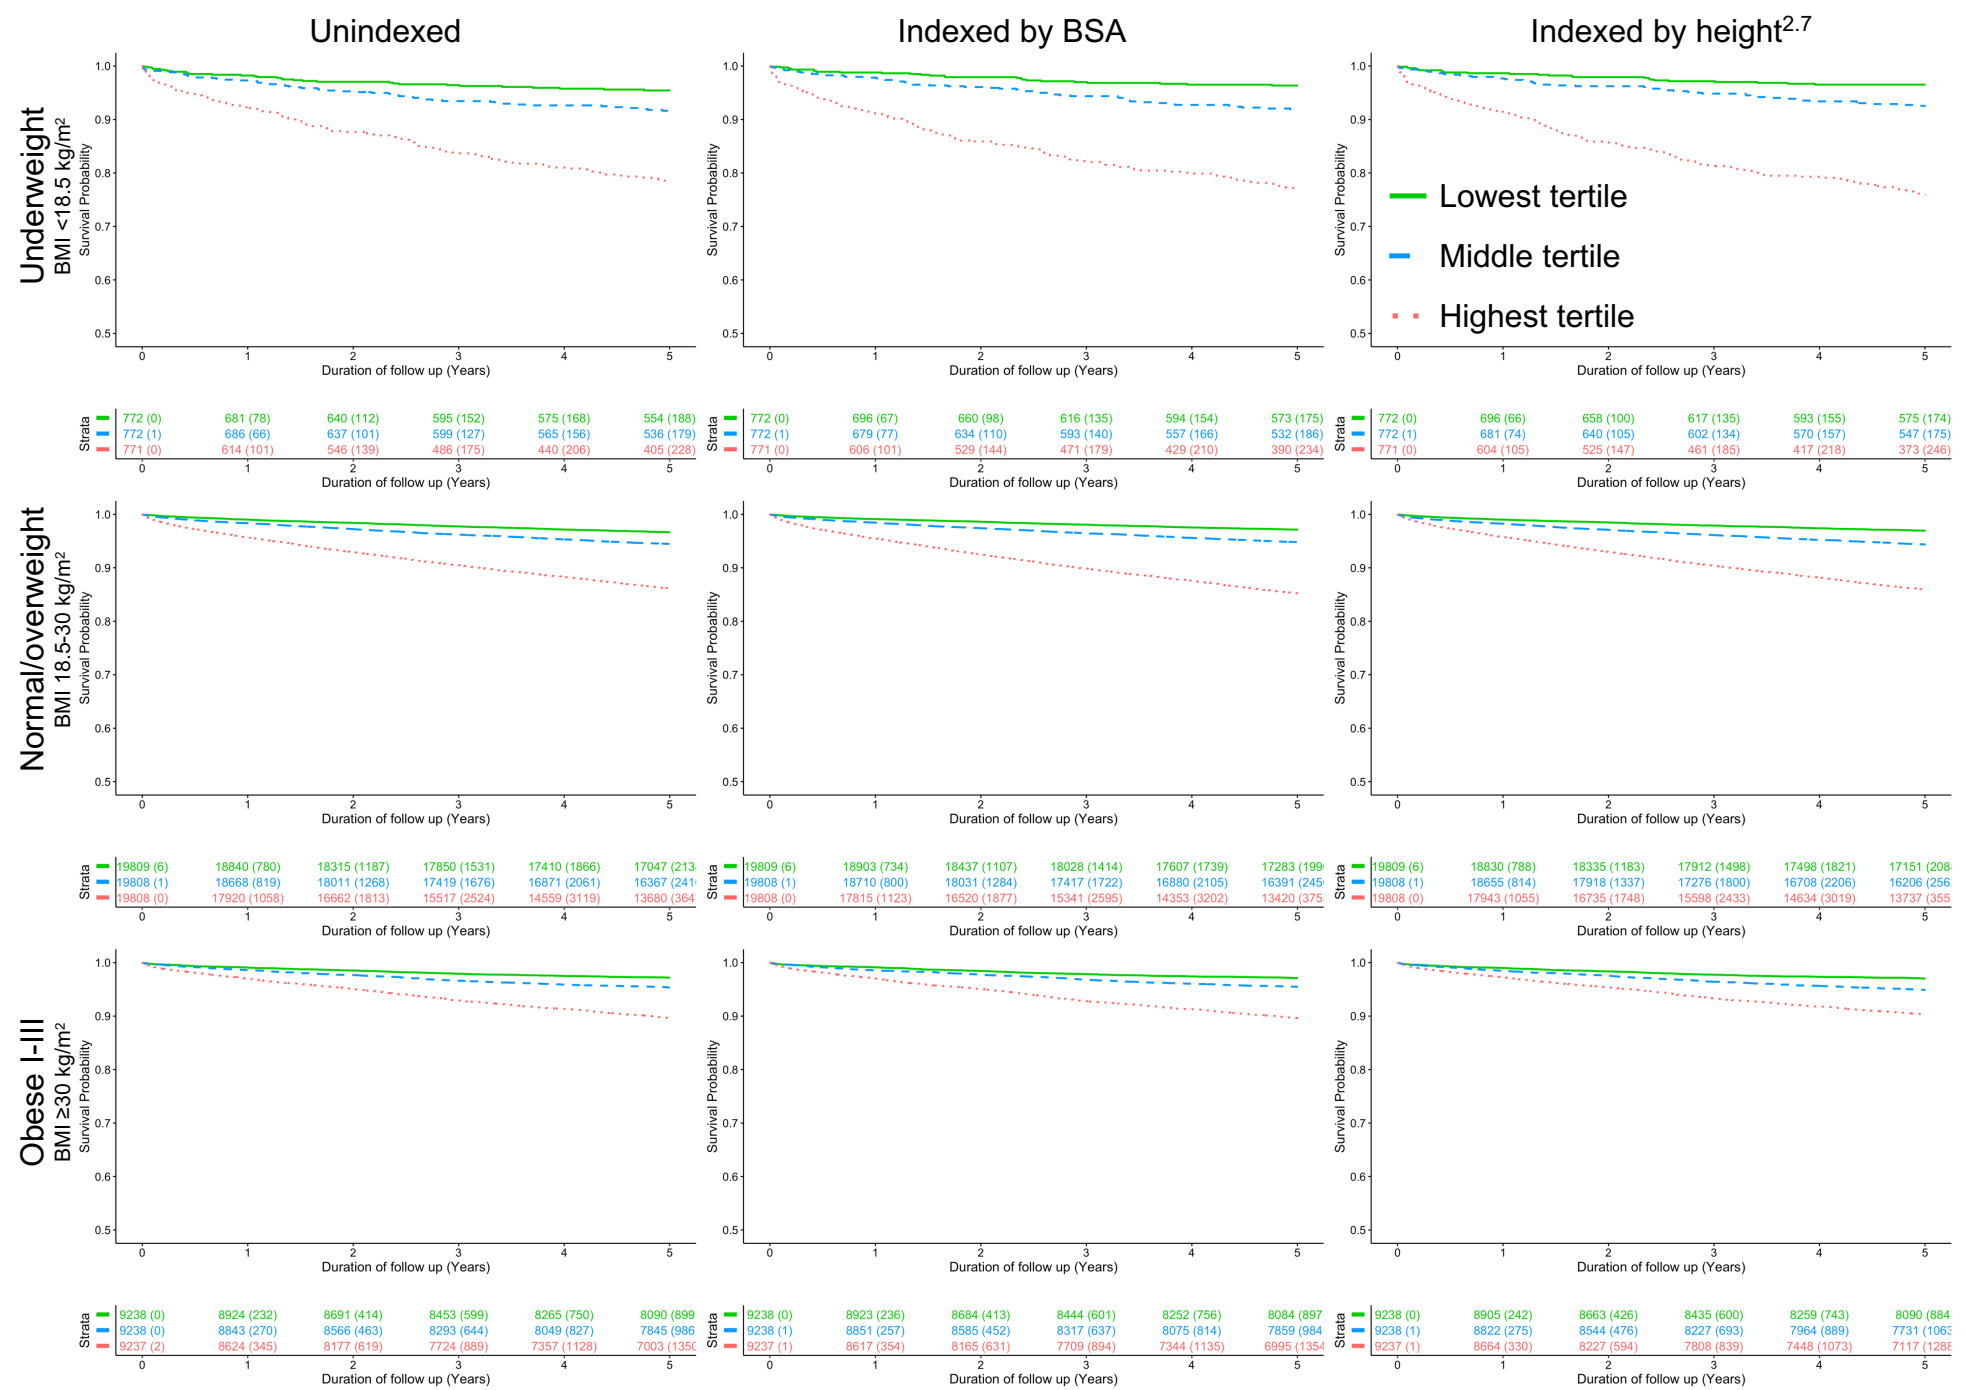

**Supplementary Figure 22.** Kaplan-Meier curves for 5-year cardiovascular mortality for LA diameter unindexed, indexed by BSA and indexed by height<sup>2.7</sup>.

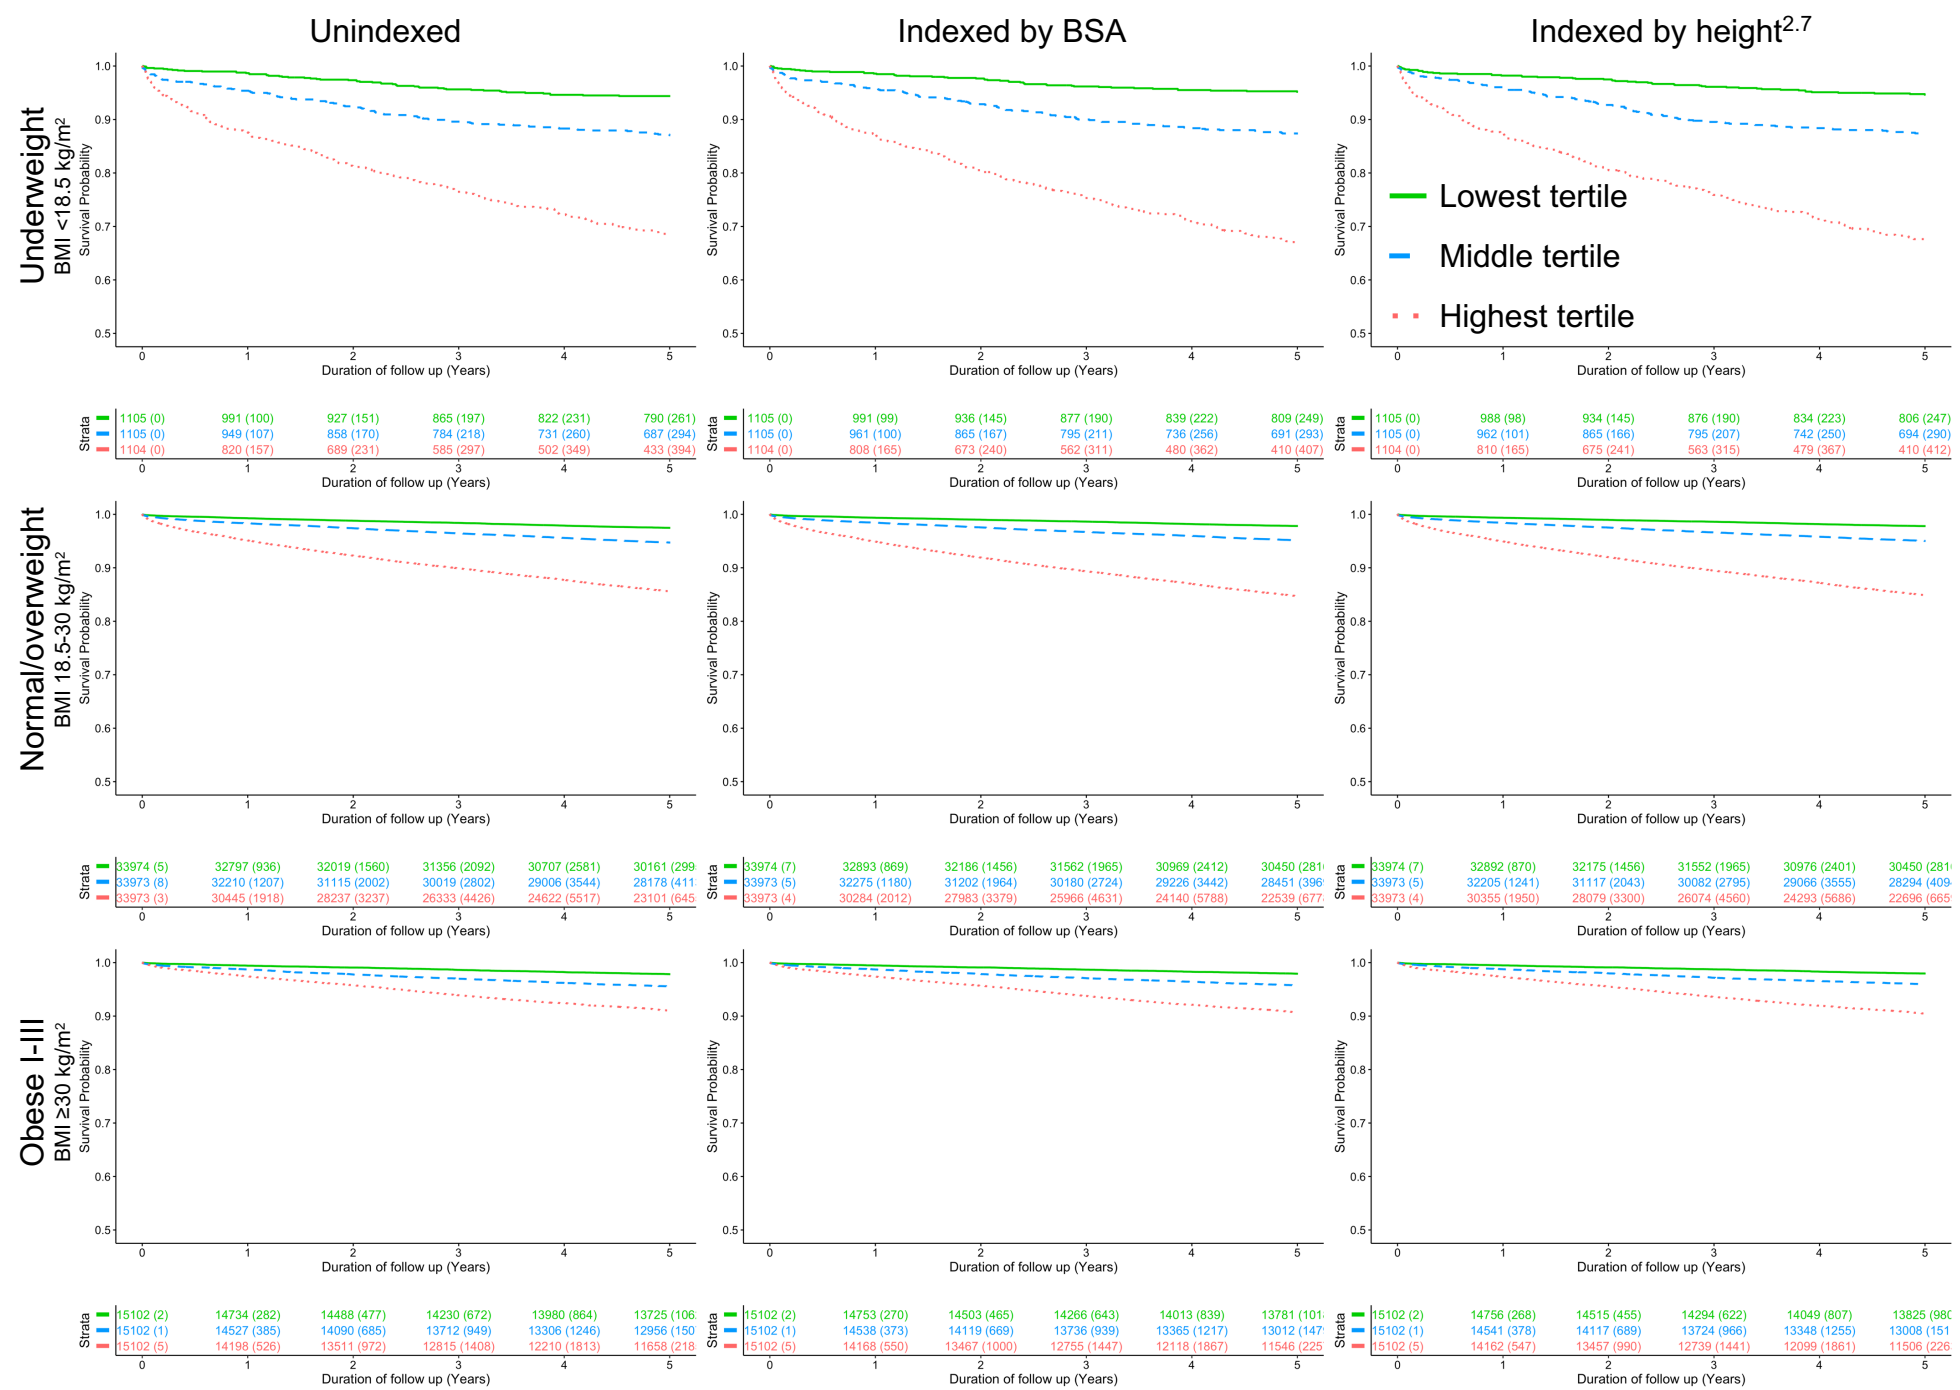

**Supplementary Figure 23.** Kaplan-Meier curves for 5-year cardiovascular mortality for LA volume unindexed, indexed by BSA and indexed by height<sup>2.7</sup>.

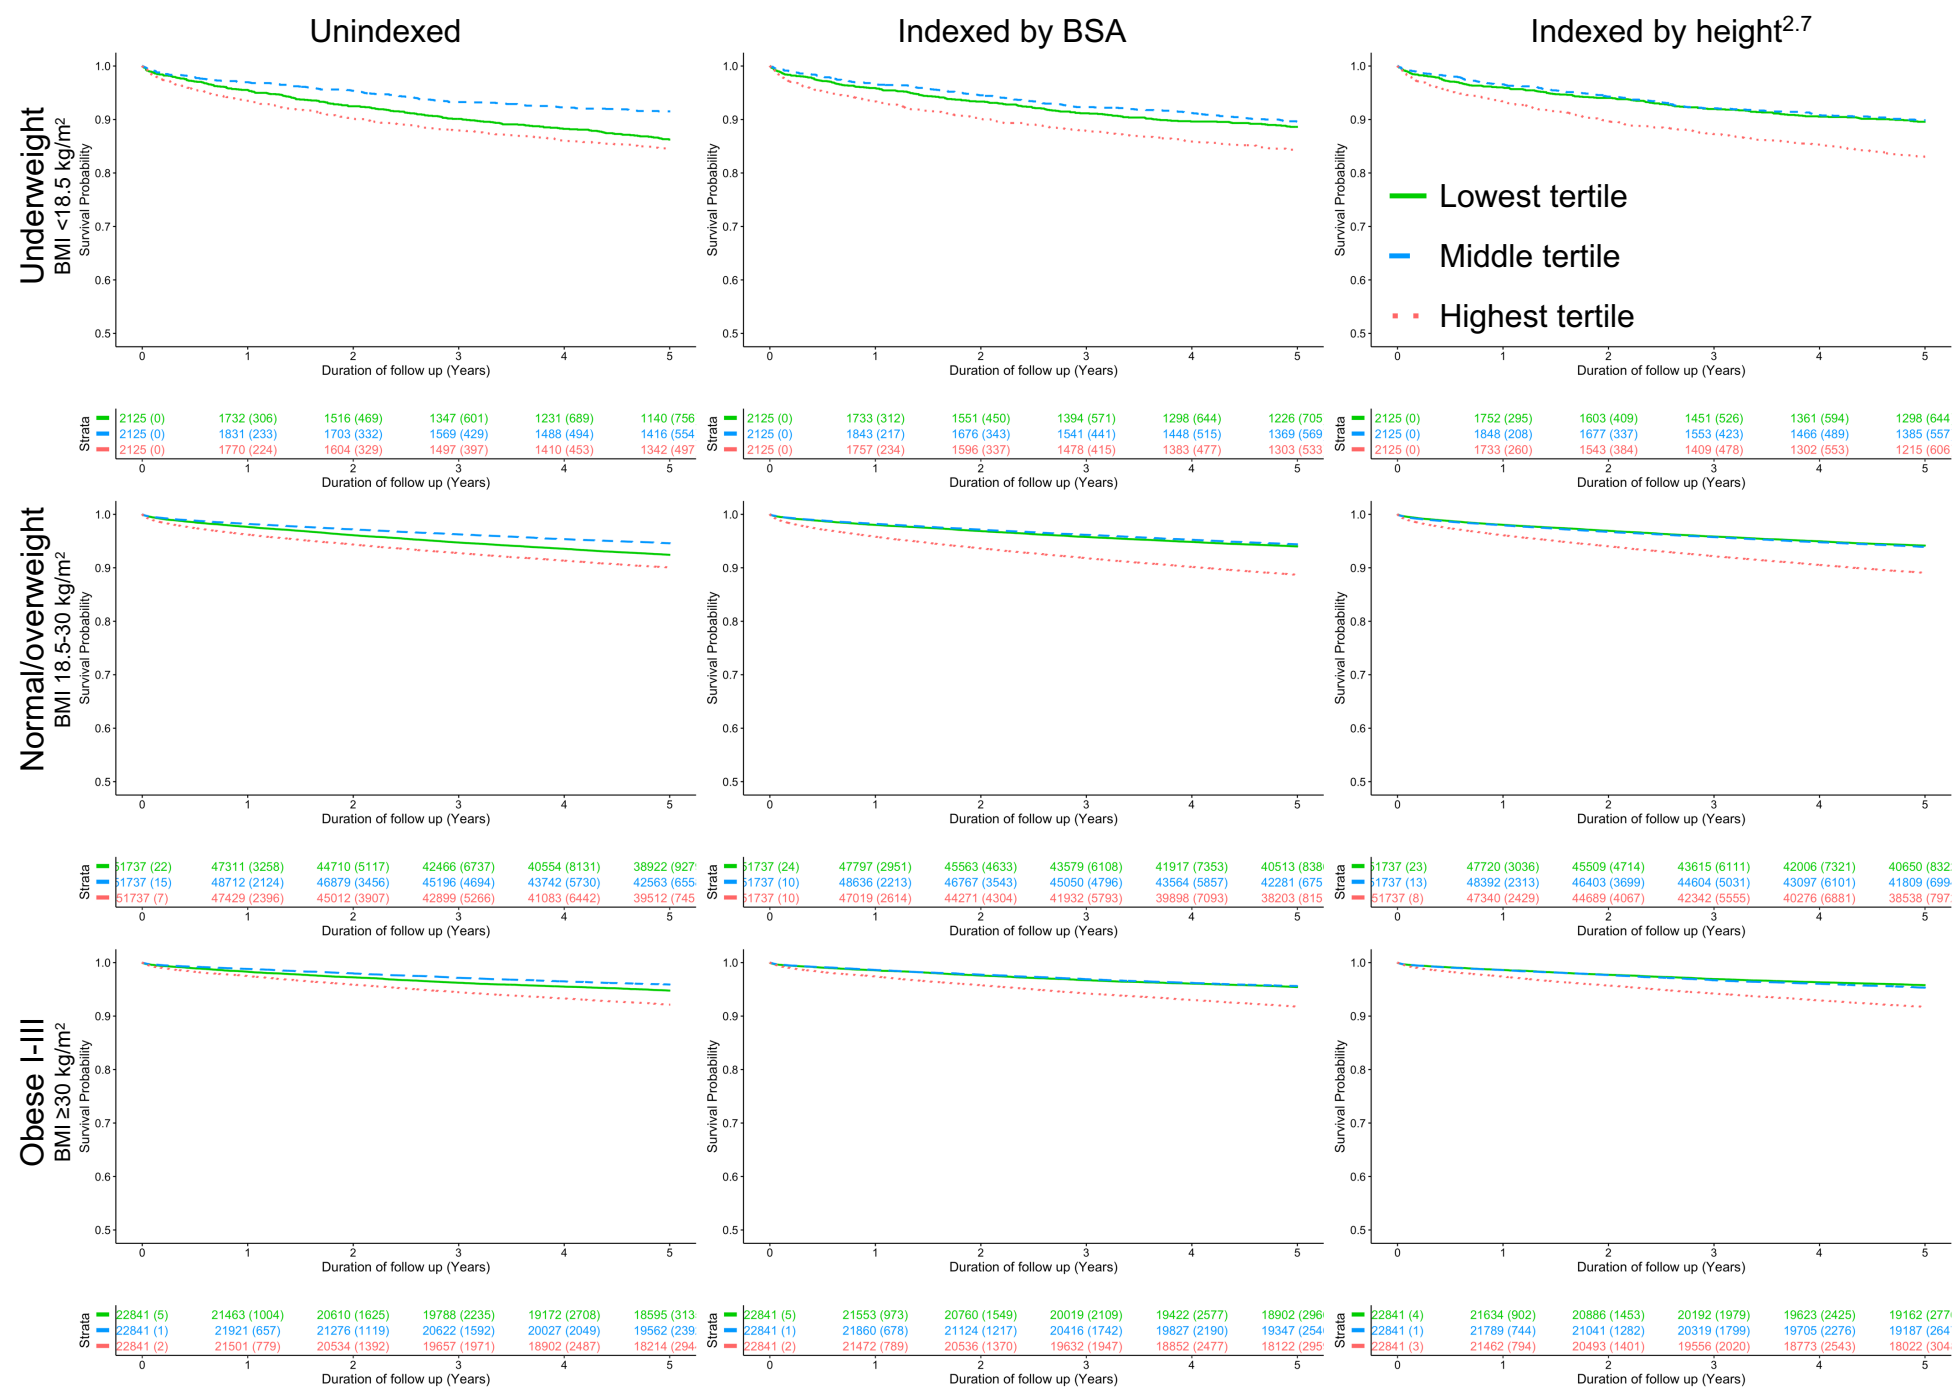

**Supplementary Figure 24.** Kaplan-Meier curves for 5-year cardiovascular mortality for LV end-diastolic diameter unindexed, indexed by BSA and indexed by height<sup>2.7</sup>.



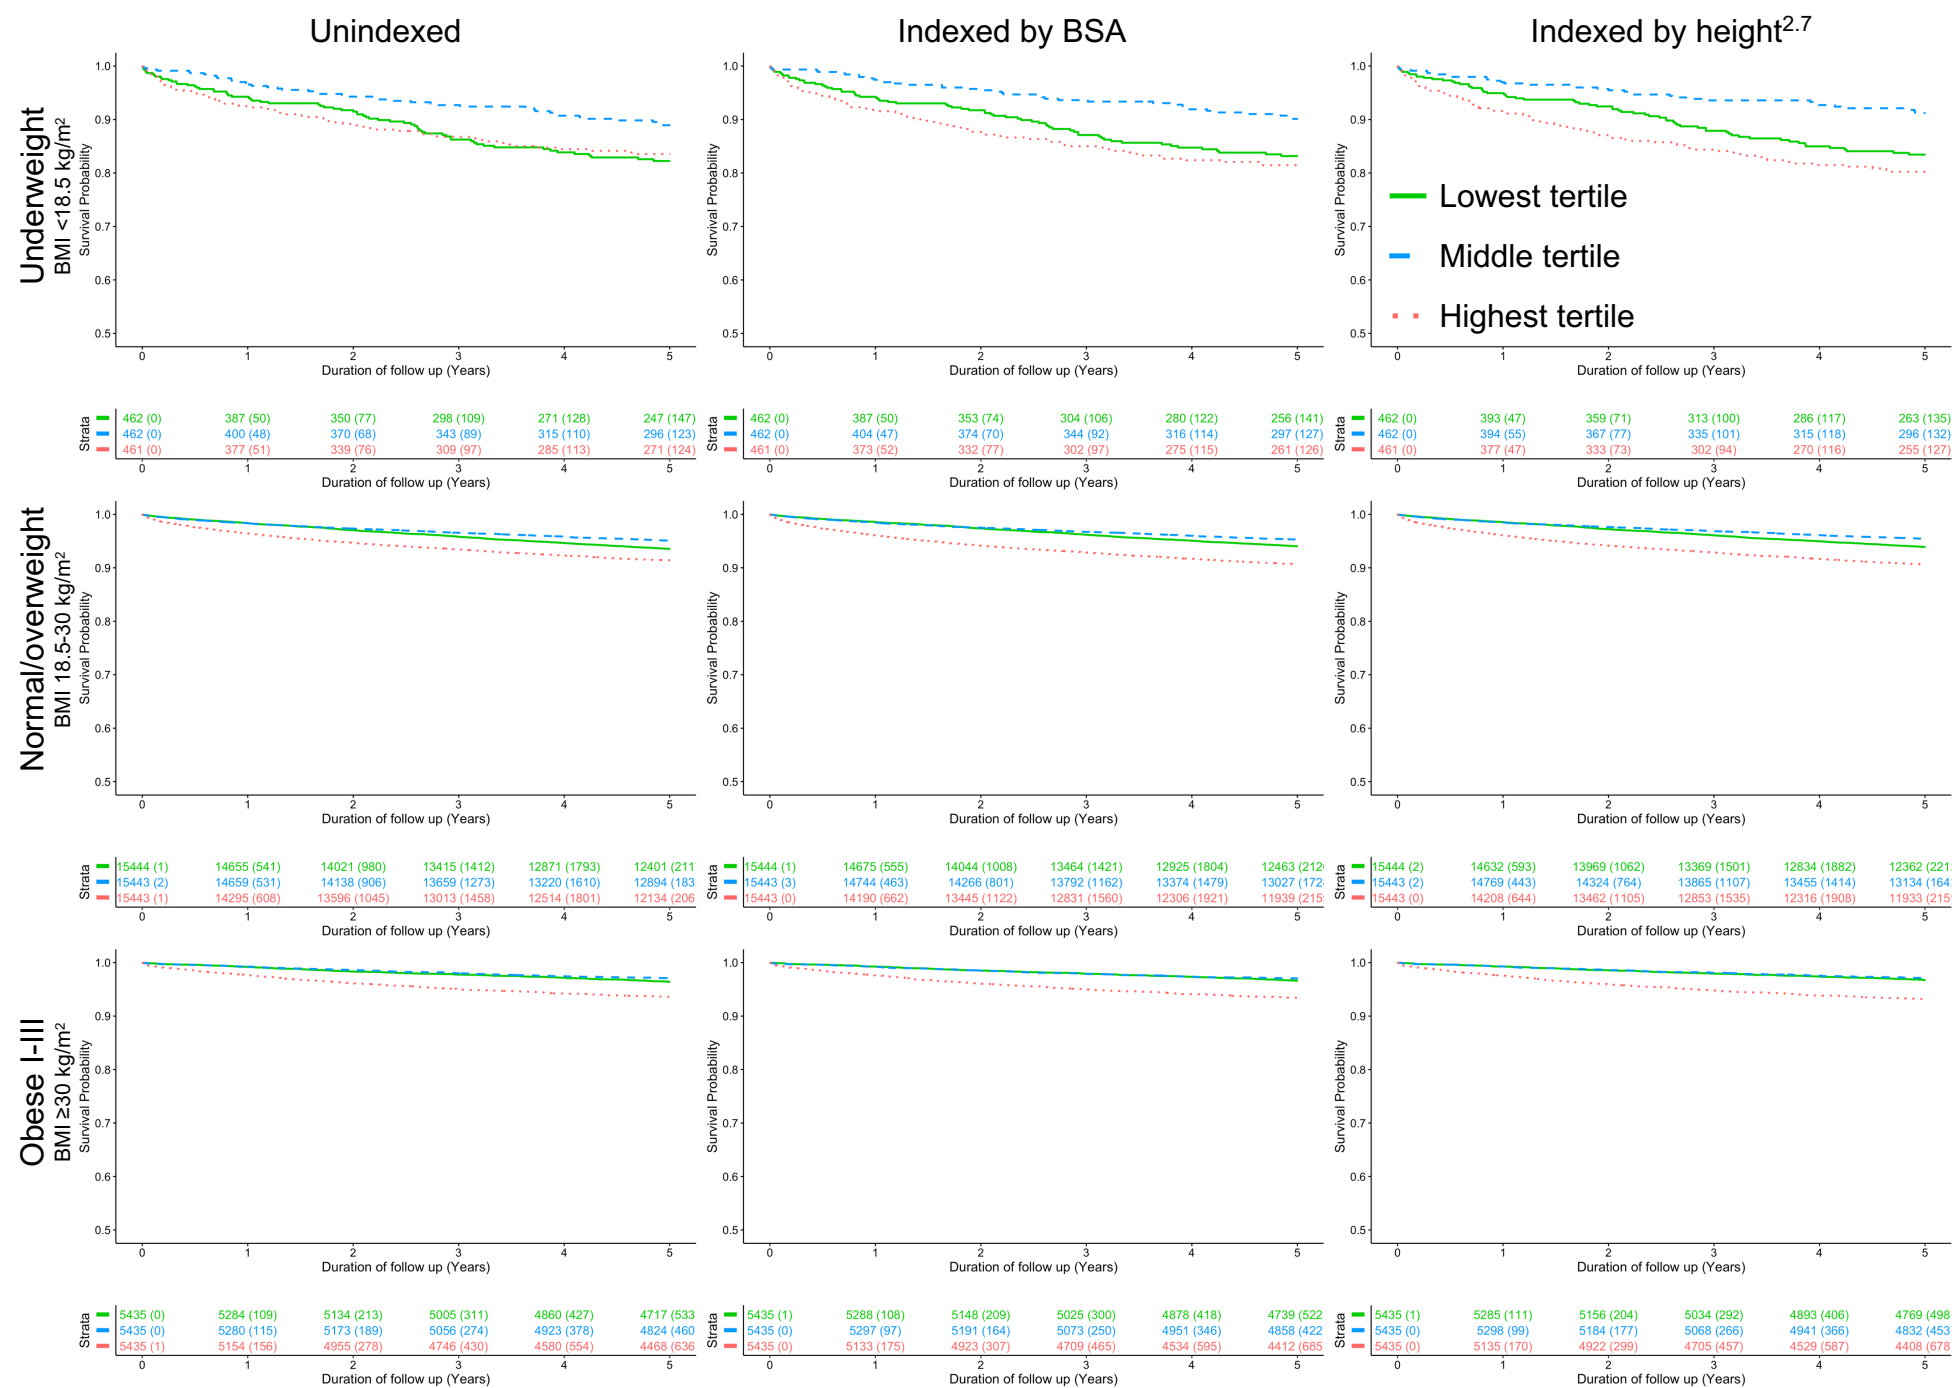

**Supplementary Figure 25.** Kaplan-Meier curves for 5-year cardiovascular mortality for LV end-diastolic volume unindexed, indexed by BSA and indexed by height<sup>2.7</sup>.

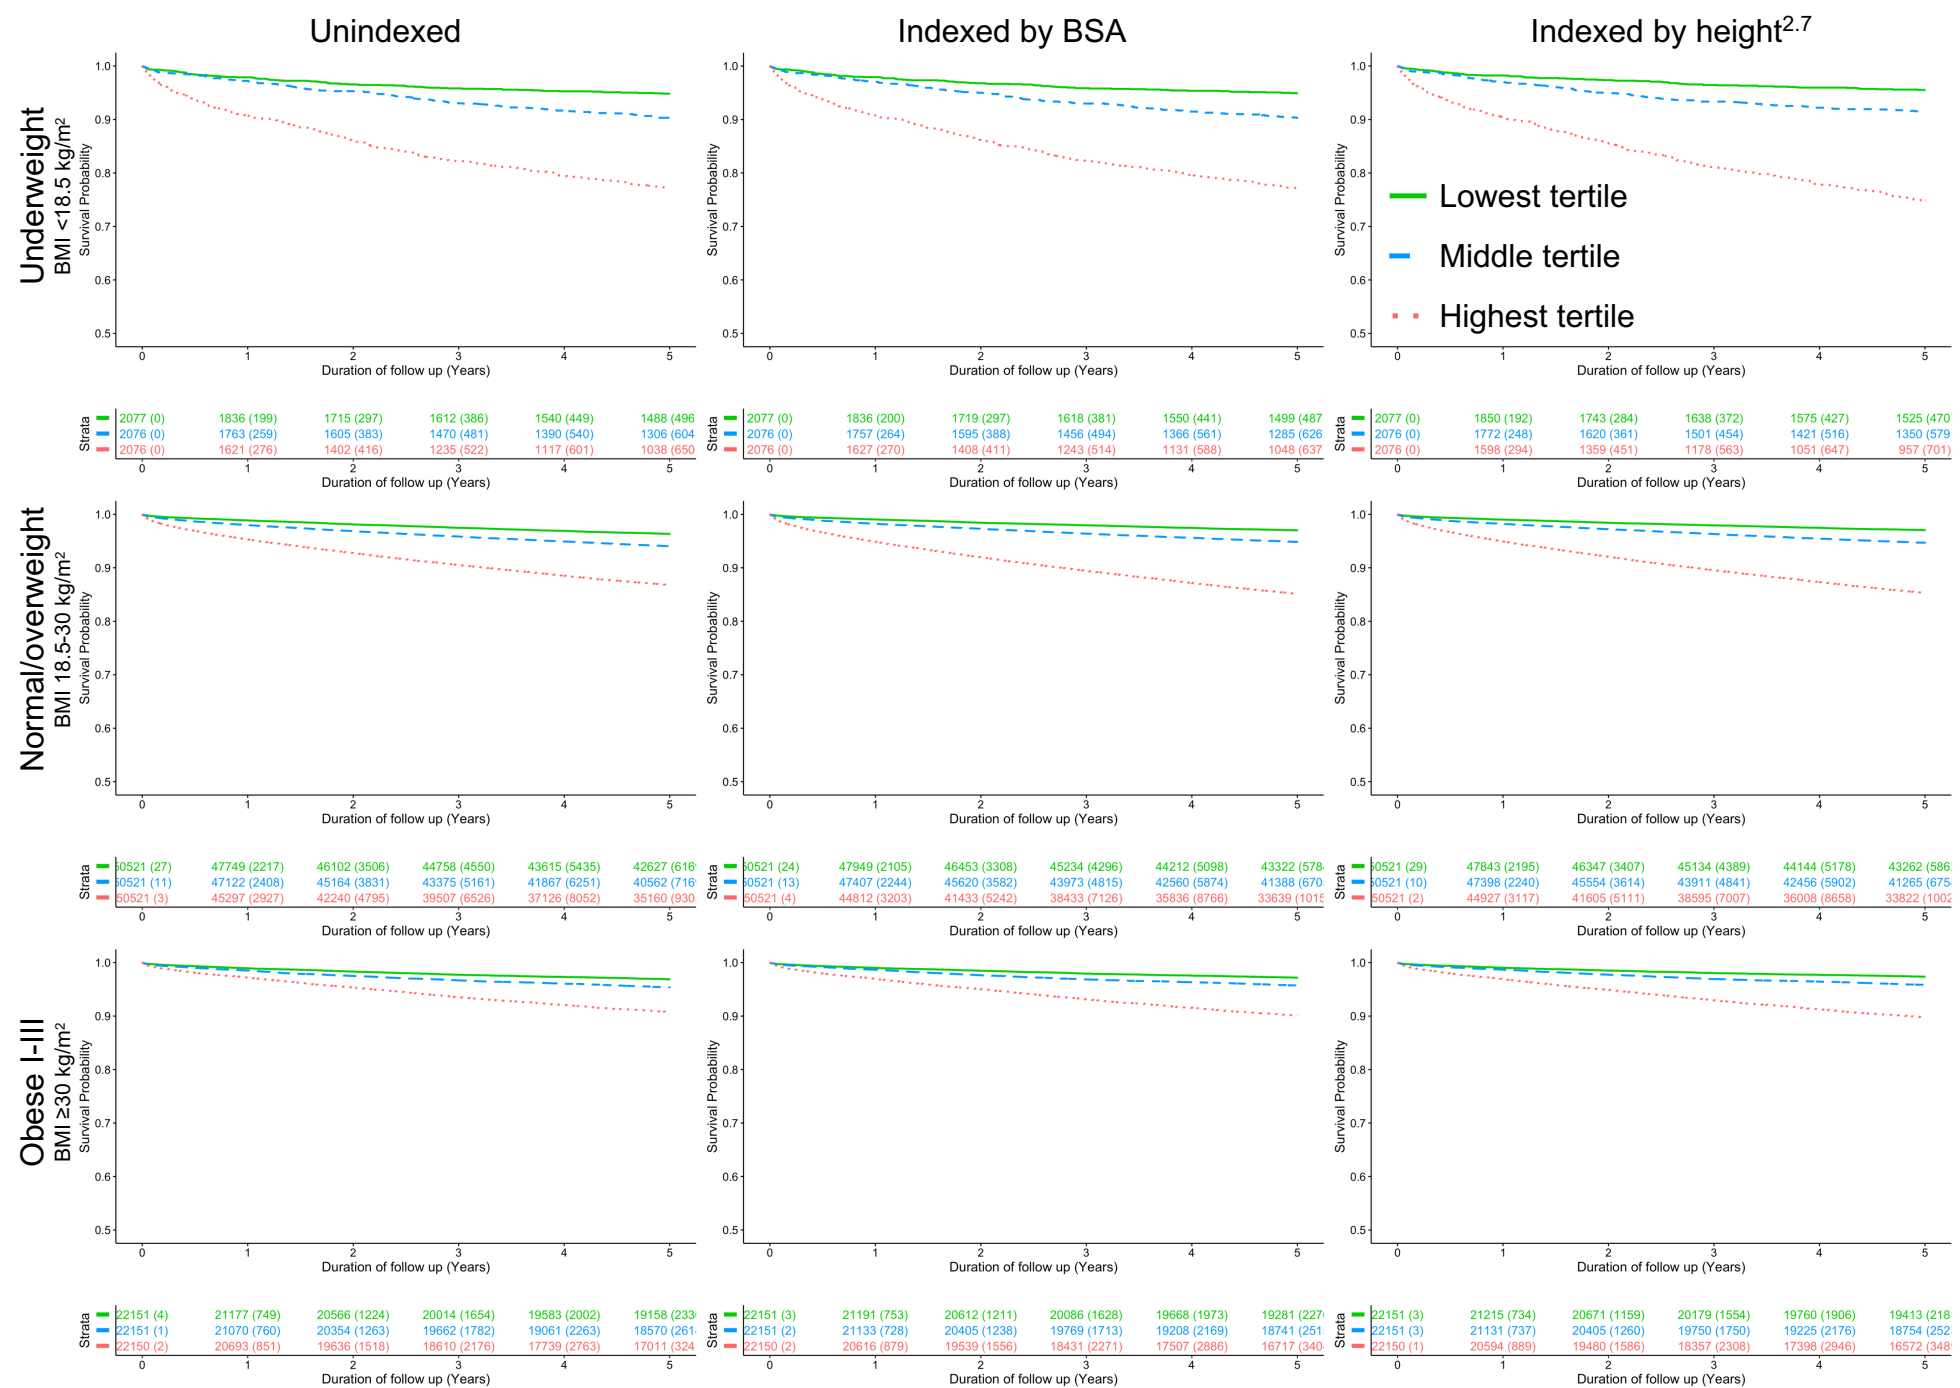

**Supplementary Figure 26.** Kaplan-Meier curves for 5-year cardiovascular mortality for LV mass unindexed, indexed by BSA and indexed by height<sup>2.7</sup>.

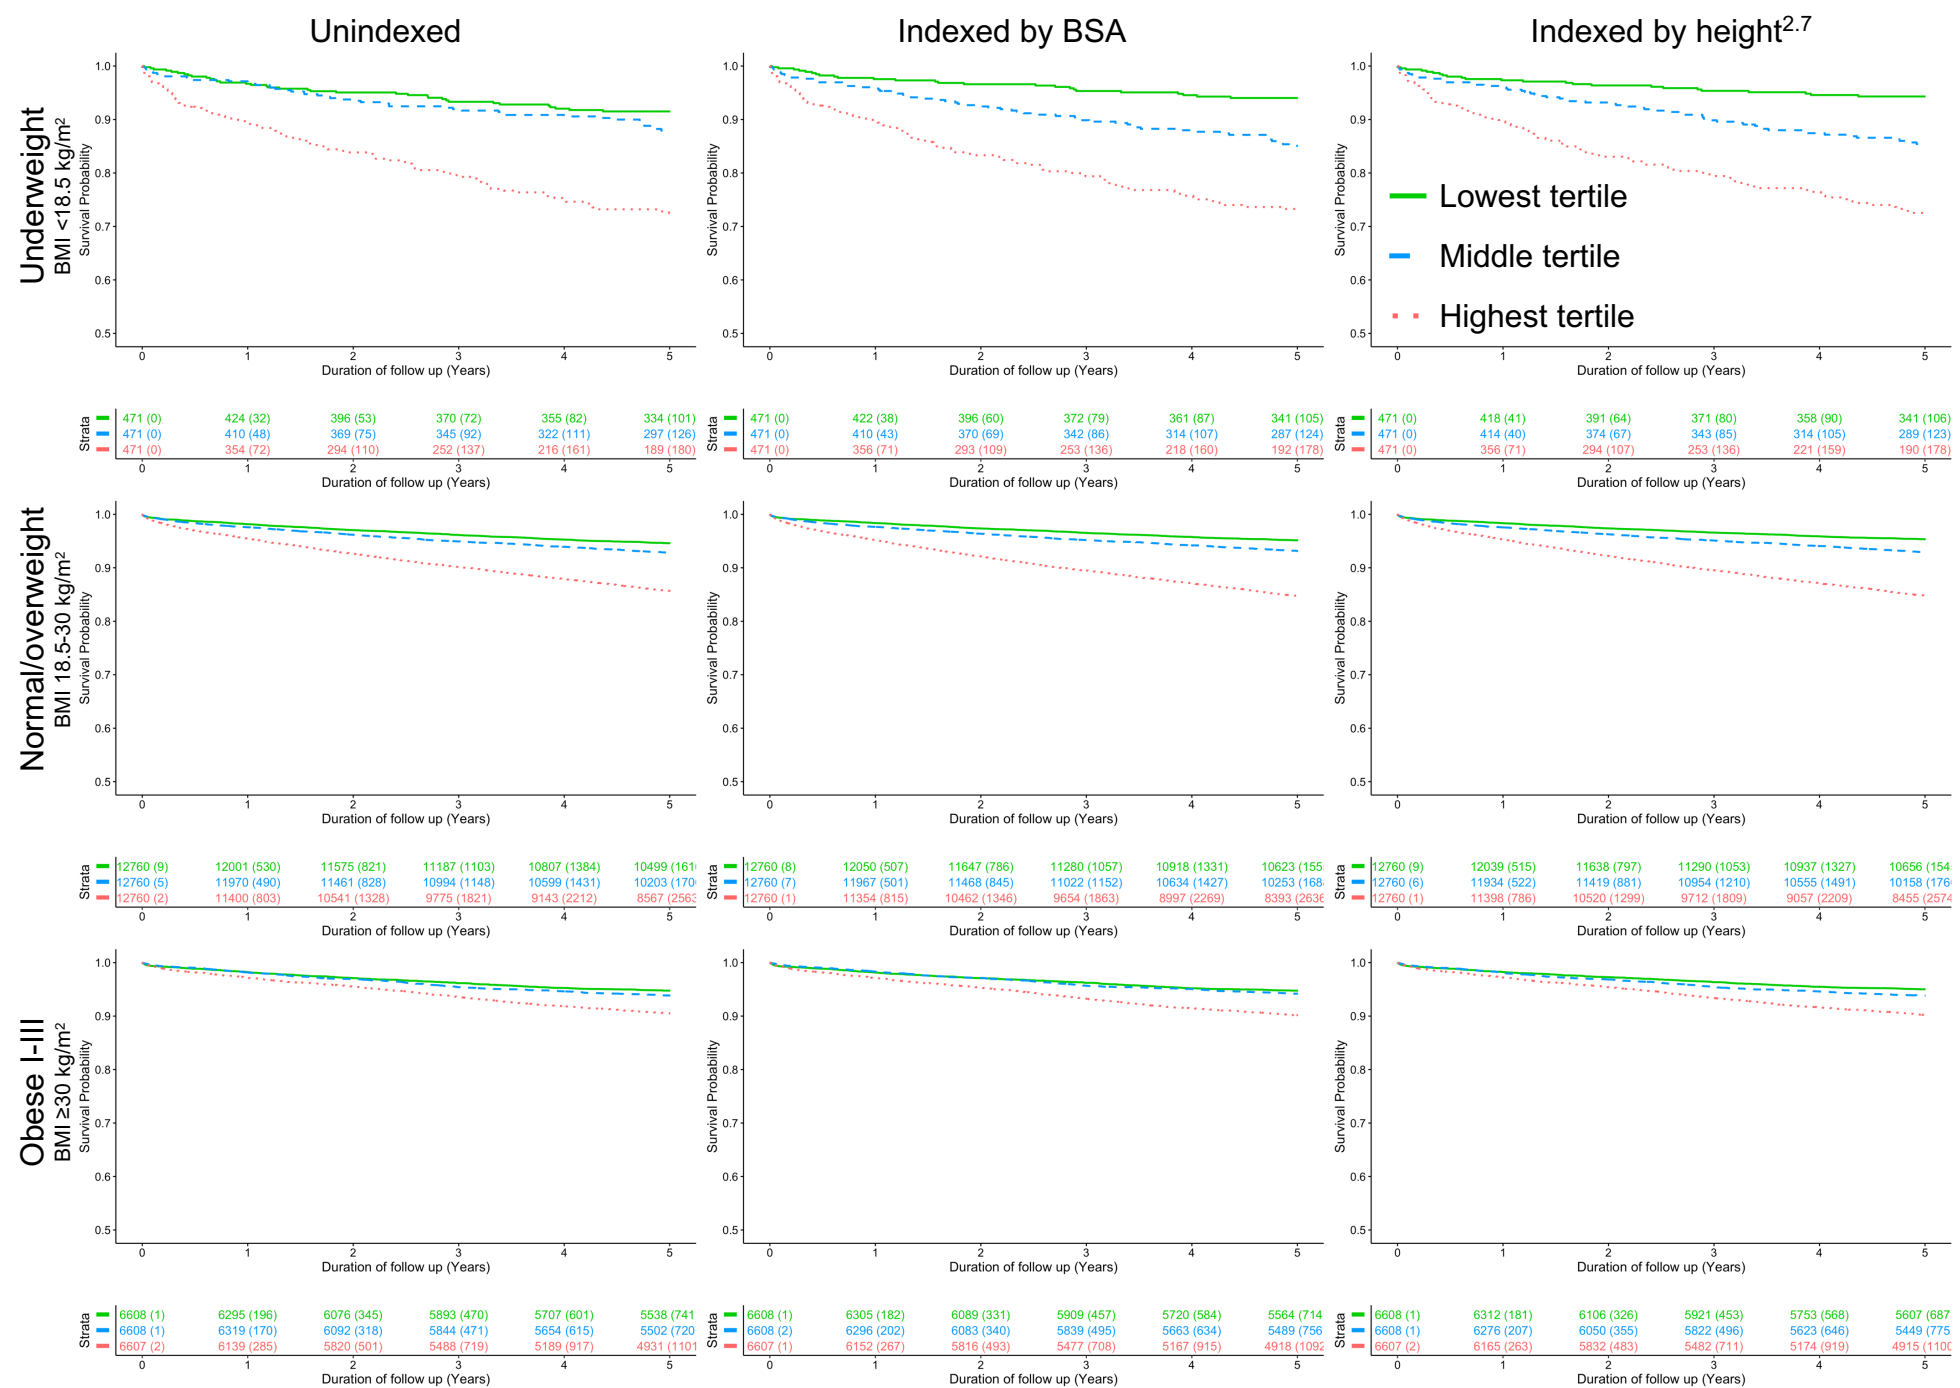

**Supplementary Figure 27.** Kaplan-Meier curves for 5-year cardiovascular mortality for RA area unindexed, indexed by BSA and indexed by height<sup>2.7</sup>.

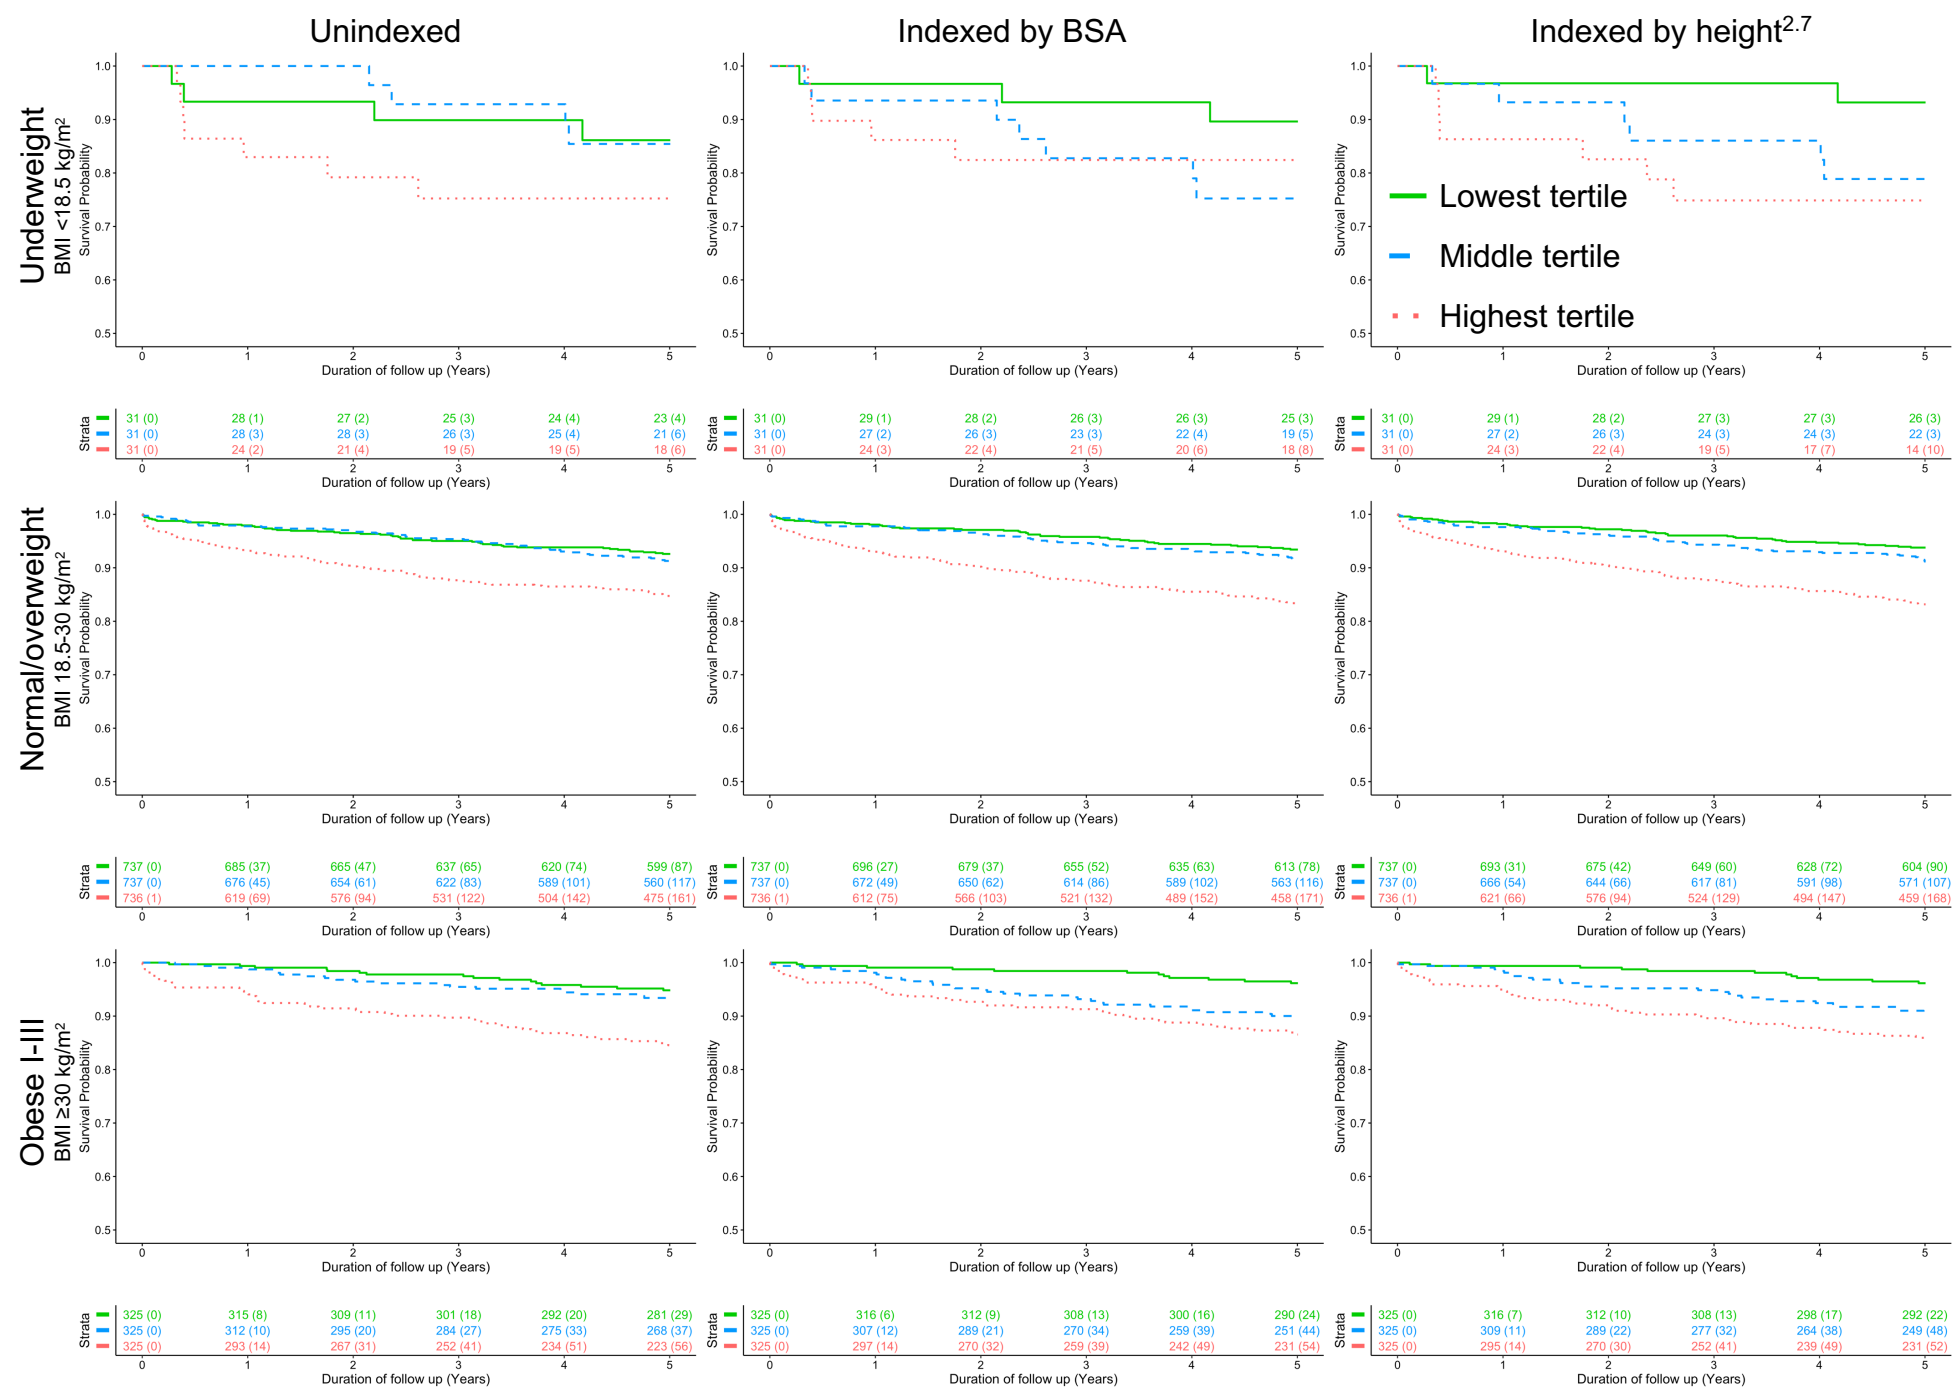

**Supplementary Figure 28.** Kaplan-Meier curves for 5-year cardiovascular mortality for RV diameter unindexed, indexed by BSA and indexed by height<sup>2.7</sup>.
