# Supplementary material for: Prognostic association supports indexing size measures in echocardiography by body surface area
Source: PubMed Central journal article supplement (PMC10632399; doi:10.1038/s41598-023-46183-z), 2023-11-08
Supplement: 41598_2023_46183_MOESM2_ESM.pdf [file 41598_2023_46183_MOESM2_ESM.pdf]

**Supplementary table 1.** Subject characteristics for patients with available follow-up data for the respective cardiac or aortic measures. RA = right atrial, RV = right ventricular, RVOT = right ventricular outflow tract, LA = left atrial, LV = left ventricular, IVS = interventricular septum.

|                          | RA area                     |                               |                             |                             |                             |                           |                |
|--------------------------|-----------------------------|-------------------------------|-----------------------------|-----------------------------|-----------------------------|---------------------------|----------------|
|                          | BMI <18.5 kg/m <sup>2</sup> | BMI 18.5-25 kg/m <sup>2</sup> | BMI 25-30 kg/m <sup>2</sup> | BMI 30-35 kg/m <sup>2</sup> | BMI 35-40 kg/m <sup>2</sup> | BMI ≥40 kg/m <sup>2</sup> | All            |
| <b>Subjects, n (%)</b>   | 1413 (2)                    | 18200 (31)                    | 20080 (34)                  | 11973 (20)                  | 4784 (8)                    | 3066 (5)                  | 59516 (100)    |
| <b>Events, n (%)</b>     | 186 (13.2)                  | 1656 (9.1)                    | 1481 (7.4)                  | 777 (6.5)                   | 330 (6.9)                   | 183 (6.0)                 | 4613 (7.8)     |
| <b>Female sex, n (%)</b> | 1012 (72)                   | 9714 (53)                     | 8250 (41)                   | 5367 (45)                   | 2535 (53)                   | 1865 (61)                 | 28743 (48)     |
| <b>Age, years</b>        | 68 [39-81]                  | 66 [47-78]                    | 66 [53-76]                  | 65 [54-74]                  | 63 [52-71]                  | 59 [49-68]                | 65 [52-76]     |
| <b>Follow-up, years</b>  | 5.6 [2-8.2]                 | 7 [4.7-11.2]                  | 7.3 [5.3-11.3]              | 7.2 [5.4-10.9]              | 7.2 [5.4-10.3]              | 6.9 [5.3-9.5]             | 7.1 [5.2-11]   |
|                          | RV diameter                 |                               |                             |                             |                             |                           |                |
|                          | BMI <18.5 kg/m <sup>2</sup> | BMI 18.5-25 kg/m <sup>2</sup> | BMI 25-30 kg/m <sup>2</sup> | BMI 30-35 kg/m <sup>2</sup> | BMI 35-40 kg/m <sup>2</sup> | BMI ≥40 kg/m <sup>2</sup> | All            |
| <b>Subjects, n (%)</b>   | 93 (3)                      | 1062 (32)                     | 1148 (35)                   | 624 (19)                    | 226 (7)                     | 125 (4)                   | 3278 (100)     |
| <b>Events, n (%)</b>     | 15 (16.1)                   | 114 (10.7)                    | 97 (8.4)                    | 54 (8.7)                    | 20 (8.8)                    | 8 (6.4)                   | 308 (9.4)      |
| <b>Female sex, n (%)</b> | 46 (50)                     | 416 (39)                      | 335 (29)                    | 220 (35)                    | 92 (41)                     | 62 (50)                   | 1171 (36)      |
| <b>Age, years</b>        | 60 [39-79]                  | 62 [43-76]                    | 63 [49-74]                  | 62 [49-71]                  | 59 [47-68]                  | 55 [46-65]                | 62 [47-74]     |
| <b>Follow-up, years</b>  | 6.6 [3.2-9.4]               | 6.8 [3.6-9.5]                 | 7 [5.4-9.6]                 | 7.1 [5.5-9.8]               | 7.3 [5.5-9.7]               | 7 [5.8-9.2]               | 7 [5.1-9.6]    |
|                          | LA area                     |                               |                             |                             |                             |                           |                |
|                          | BMI <18.5 kg/m <sup>2</sup> | BMI 18.5-25 kg/m <sup>2</sup> | BMI 25-30 kg/m <sup>2</sup> | BMI 30-35 kg/m <sup>2</sup> | BMI 35-40 kg/m <sup>2</sup> | BMI ≥40 kg/m <sup>2</sup> | All            |
| <b>Subjects, n (%)</b>   | 2259 (2)                    | 28224 (31)                    | 30373 (34)                  | 17697 (20)                  | 7236 (8)                    | 4807 (5)                  | 90596 (100)    |
| <b>Events, n (%)</b>     | 302 (13.4)                  | 2634 (9.3)                    | 2267 (7.5)                  | 1182 (6.7)                  | 498 (6.9)                   | 316 (6.6)                 | 7199 (7.9)     |
| <b>Female sex, n (%)</b> | 1573 (70)                   | 14468 (51)                    | 11922 (39)                  | 7678 (43)                   | 3692 (51)                   | 2899 (60)                 | 42232 (47)     |
| <b>Age, years</b>        | 67 [39-81]                  | 66 [47-78]                    | 66 [53-76]                  | 65 [53-74]                  | 63 [52-71]                  | 59 [49-68]                | 65 [51-76]     |
| <b>Follow-up, years</b>  | 5.4 [1.7-9]                 | 7.1 [4.2-10.6]                | 7.7 [5.2-10.9]              | 7.7 [5.3-10.7]              | 7.6 [5.3-10.5]              | 7.3 [5.2-10]              | 7.4 [5.1-10.6] |
|                          | LA diameter                 |                               |                             |                             |                             |                           |                |
|                          | BMI <18.5 kg/m <sup>2</sup> | BMI 18.5-25 kg/m <sup>2</sup> | BMI 25-30 kg/m <sup>2</sup> | BMI 30-35 kg/m <sup>2</sup> | BMI 35-40 kg/m <sup>2</sup> | BMI ≥40 kg/m <sup>2</sup> | All            |
| <b>Subjects, n (%)</b>   | 2315 (3)                    | 29002 (32)                    | 30423 (34)                  | 16880 (19)                  | 6634 (7)                    | 4199 (5)                  | 89453 (100)    |
| <b>Events, n (%)</b>     | 227 (9.8)                   | 2254 (7.8)                    | 1883 (6.2)                  | 949 (5.6)                   | 382 (5.8)                   | 211 (5.0)                 | 5906 (6.6)     |
| <b>Female sex, n (%)</b> | 1572 (68)                   | 15935 (55)                    | 12745 (42)                  | 8006 (47)                   | 3665 (55)                   | 2713 (65)                 | 44636 (50)     |
| <b>Age, years</b>        | 63 [35-78]                  | 62 [43-76]                    | 64 [51-74]                  | 63 [52-73]                  | 61 [50-70]                  | 58 [47-66]                | 63 [49-74]     |
| <b>Follow-up, years</b>  | 6.6 [2.6-11]                | 8.3 [5.2-12.8]                | 8.5 [5.6-12.5]              | 8.3 [5.7-12.1]              | 8.1 [5.6-11.6]              | 7.7 [5.5-11.1]            | 8.3 [5.5-12.4] |

**Supplementary table 1.** Subject characteristics for patients with available follow-up data for the respective cardiac or aortic measures. RA = right atrial, RV = right ventricular, RVOT = right ventricular outflow tract, LA = left atrial, LV = left ventricular, IVS = interventricular septum.

|                          | LA volume                   |                               |                             |                             |                             |                           |                |
|--------------------------|-----------------------------|-------------------------------|-----------------------------|-----------------------------|-----------------------------|---------------------------|----------------|
|                          | BMI <18.5 kg/m <sup>2</sup> | BMI 18.5-25 kg/m <sup>2</sup> | BMI 25-30 kg/m <sup>2</sup> | BMI 30-35 kg/m <sup>2</sup> | BMI 35-40 kg/m <sup>2</sup> | BMI ≥40 kg/m <sup>2</sup> | All            |
| <b>Subjects, n (%)</b>   | 3314 (2)                    | 48955 (33)                    | 52965 (35)                  | 28382 (19)                  | 10633 (7)                   | 6291 (4)                  | 150540 (100)   |
| <b>Events, n (%)</b>     | 455 (13.7)                  | 3913 (8.0)                    | 3011 (5.7)                  | 1384 (4.9)                  | 519 (4.9)                   | 311 (4.9)                 | 9593 (6.4)     |
| <b>Female sex, n (%)</b> | 2410 (73)                   | 26652 (54)                    | 21113 (40)                  | 12887 (45)                  | 5708 (54)                   | 3909 (62)                 | 72679 (48)     |
| <b>Age, years</b>        | 71 [45-83]                  | 66 [49-79]                    | 65 [53-76]                  | 64 [53-73]                  | 62 [51-71]                  | 58 [48-67]                | 64 [51-76]     |
| <b>Follow-up, years</b>  | 5.7 [2-8.8]                 | 7.4 [5.1-10.2]                | 7.8 [5.6-10.5]              | 7.9 [5.7-10.5]              | 7.8 [5.8-10.4]              | 7.8 [5.7-10.2]            | 7.7 [5.5-10.3] |
|                          | LV end-diastolic diameter   |                               |                             |                             |                             |                           |                |
|                          | BMI <18.5 kg/m <sup>2</sup> | BMI 18.5-25 kg/m <sup>2</sup> | BMI 25-30 kg/m <sup>2</sup> | BMI 30-35 kg/m <sup>2</sup> | BMI 35-40 kg/m <sup>2</sup> | BMI ≥40 kg/m <sup>2</sup> | All            |
| <b>Subjects, n (%)</b>   | 6375 (3)                    | 75797 (33)                    | 79414 (35)                  | 42274 (18)                  | 16191 (7)                   | 10058 (4)                 | 230109 (100)   |
| <b>Events, n (%)</b>     | 673 (10.6)                  | 6186 (8.2)                    | 4752 (6.0)                  | 2296 (5.4)                  | 849 (5.2)                   | 539 (5.4)                 | 15295 (6.6)    |
| <b>Female sex, n (%)</b> | 4287 (67)                   | 40620 (54)                    | 31613 (40)                  | 19151 (45)                  | 8699 (54)                   | 6181 (62)                 | 110551 (48)    |
| <b>Age, years</b>        | 66 [42-80]                  | 64 [46-78]                    | 64 [52-75]                  | 63 [52-73]                  | 61 [50-70]                  | 58 [48-67]                | 63 [50-75]     |
| <b>Follow-up, years</b>  | 6.1 [2.1-9.8]               | 7.2 [5-10.5]                  | 7.5 [5.4-10.6]              | 7.5 [5.5-10.5]              | 7.4 [5.5-10.3]              | 7.1 [5.4-9.9]             | 7.3 [5.3-10.5] |
|                          | LV end-diastolic volume     |                               |                             |                             |                             |                           |                |
|                          | BMI <18.5 kg/m <sup>2</sup> | BMI 18.5-25 kg/m <sup>2</sup> | BMI 25-30 kg/m <sup>2</sup> | BMI 30-35 kg/m <sup>2</sup> | BMI 35-40 kg/m <sup>2</sup> | BMI ≥40 kg/m <sup>2</sup> | All            |
| <b>Subjects, n (%)</b>   | 1385 (2)                    | 22609 (35)                    | 23721 (37)                  | 11135 (17)                  | 3633 (6)                    | 1537 (2)                  | 64020 (100)    |
| <b>Events, n (%)</b>     | 177 (12.8)                  | 1707 (7.6)                    | 1182 (5.0)                  | 475 (4.3)                   | 135 (3.7)                   | 58 (3.8)                  | 3734 (5.8)     |
| <b>Female sex, n (%)</b> | 1037 (75)                   | 12430 (55)                    | 9261 (39)                   | 5161 (46)                   | 2059 (57)                   | 1048 (68)                 | 30996 (48)     |
| <b>Age, years</b>        | 73 [47-84]                  | 66 [48-79]                    | 64 [52-75]                  | 63 [52-73]                  | 60 [50-70]                  | 59 [48-68]                | 64 [50-76]     |
| <b>Follow-up, years</b>  | 5.6 [2.1-8.2]               | 6.9 [5.2-9.2]                 | 7.2 [5.5-9.4]               | 7.2 [5.6-9.4]               | 7.2 [5.7-9.4]               | 7 [5.5-8.9]               | 7 [5.4-9.3]    |
|                          | IVS thickness               |                               |                             |                             |                             |                           |                |
|                          | BMI <18.5 kg/m <sup>2</sup> | BMI 18.5-25 kg/m <sup>2</sup> | BMI 25-30 kg/m <sup>2</sup> | BMI 30-35 kg/m <sup>2</sup> | BMI 35-40 kg/m <sup>2</sup> | BMI ≥40 kg/m <sup>2</sup> | All            |
| <b>Subjects, n (%)</b>   | 6468 (3)                    | 76878 (33)                    | 80629 (35)                  | 42795 (18)                  | 16345 (7)                   | 10130 (4)                 | 233245 (100)   |
| <b>Events, n (%)</b>     | 677 (10.5)                  | 6305 (8.2)                    | 4855 (6.0)                  | 2331 (5.4)                  | 852 (5.2)                   | 539 (5.3)                 | 15559 (6.7)    |
| <b>Female sex, n (%)</b> | 4361 (67)                   | 41092 (54)                    | 32034 (40)                  | 19358 (45)                  | 8796 (54)                   | 6244 (62)                 | 111885 (48)    |
| <b>Age, years</b>        | 66 [42-80]                  | 64 [46-78]                    | 64 [52-75]                  | 63 [52-73]                  | 61 [50-70]                  | 58 [47-67]                | 63 [50-75]     |
| <b>Follow-up, years</b>  | 6.1 [2.1-9.8]               | 7.1 [5-10.5]                  | 7.4 [5.4-10.6]              | 7.5 [5.5-10.5]              | 7.4 [5.5-10.2]              | 7.1 [5.4-9.8]             | 7.3 [5.3-10.4] |

**Supplementary table 1.** Subject characteristics for patients with available follow-up data for the respective cardiac or aortic measures. RA = right atrial, RV = right ventricular, RVOT = right ventricular outflow tract, LA = left atrial, LV = left ventricular, IVS = interventricular septum.

|                          | LV mass                       |                               |                             |                             |                             |                           |                |
|--------------------------|-------------------------------|-------------------------------|-----------------------------|-----------------------------|-----------------------------|---------------------------|----------------|
|                          | BMI <18.5 kg/m <sup>2</sup>   | BMI 18.5-25 kg/m <sup>2</sup> | BMI 25-30 kg/m <sup>2</sup> | BMI 30-35 kg/m <sup>2</sup> | BMI 35-40 kg/m <sup>2</sup> | BMI ≥40 kg/m <sup>2</sup> | All            |
| <b>Subjects, n (%)</b>   | 6229 (3)                      | 74029 (33)                    | 77534 (35)                  | 41112 (18)                  | 15681 (7)                   | 9659 (4)                  | 224244 (100)   |
| <b>Events, n (%)</b>     | 650 (10.4)                    | 6000 (8.1)                    | 4583 (5.9)                  | 2204 (5.4)                  | 805 (5.1)                   | 512 (5.3)                 | 14754 (6.6)    |
| <b>Female sex, n (%)</b> | 4205 (68)                     | 39815 (54)                    | 30997 (40)                  | 18715 (46)                  | 8506 (54)                   | 5989 (62)                 | 108227 (48)    |
| <b>Age, years</b>        | 66 [42-80]                    | 64 [46-78]                    | 64 [52-75]                  | 63 [52-73]                  | 61 [50-70]                  | 58 [48-67]                | 63 [50-75]     |
| <b>Follow-up, years</b>  | 6.1 [2.1-9.9]                 | 7.1 [5-10.5]                  | 7.5 [5.4-10.6]              | 7.5 [5.5-10.5]              | 7.4 [5.5-10.3]              | 7.1 [5.4-9.8]             | 7.3 [5.3-10.5] |
|                          | Aortic sinus diameter         |                               |                             |                             |                             |                           |                |
|                          | BMI <18.5 kg/m <sup>2</sup>   | BMI 18.5-25 kg/m <sup>2</sup> | BMI 25-30 kg/m <sup>2</sup> | BMI 30-35 kg/m <sup>2</sup> | BMI 35-40 kg/m <sup>2</sup> | BMI ≥40 kg/m <sup>2</sup> | All            |
| <b>Subjects, n (%)</b>   | 2157 (2)                      | 30172 (33)                    | 32361 (36)                  | 16629 (18)                  | 6032 (7)                    | 3454 (4)                  | 90805 (100)    |
| <b>Events, n (%)</b>     | 284 (13.2)                    | 2470 (8.2)                    | 1767 (5.5)                  | 793 (4.8)                   | 277 (4.6)                   | 174 (5.0)                 | 5765 (6.3)     |
| <b>Female sex, n (%)</b> | 1551 (72)                     | 16252 (54)                    | 12411 (38)                  | 7364 (44)                   | 3181 (53)                   | 2054 (60)                 | 42813 (47)     |
| <b>Age, years</b>        | 72 [45-83]                    | 66 [49-80]                    | 65 [53-76]                  | 64 [53-73]                  | 61 [51-70]                  | 58 [49-67]                | 64 [51-76]     |
| <b>Follow-up, years</b>  | 5.7 [1.8-8.4]                 | 7.3 [5.1-9.6]                 | 7.6 [5.6-9.8]               | 7.6 [5.7-9.7]               | 7.7 [5.8-9.6]               | 7.4 [5.6-9.3]             | 7.5 [5.4-9.7]  |
|                          | Aorta at sinotubular diameter |                               |                             |                             |                             |                           |                |
|                          | BMI <18.5 kg/m <sup>2</sup>   | BMI 18.5-25 kg/m <sup>2</sup> | BMI 25-30 kg/m <sup>2</sup> | BMI 30-35 kg/m <sup>2</sup> | BMI 35-40 kg/m <sup>2</sup> | BMI ≥40 kg/m <sup>2</sup> | All            |
| <b>Subjects, n (%)</b>   | 1334 (2)                      | 18454 (30)                    | 21422 (35)                  | 12233 (20)                  | 4563 (8)                    | 2607 (4)                  | 60613 (100)    |
| <b>Events, n (%)</b>     | 199 (14.9)                    | 1757 (9.5)                    | 1432 (6.7)                  | 711 (5.8)                   | 274 (6.0)                   | 143 (5.5)                 | 4516 (7.5)     |
| <b>Female sex, n (%)</b> | 922 (69)                      | 9072 (49)                     | 7552 (35)                   | 4963 (41)                   | 2219 (49)                   | 1491 (57)                 | 26219 (43)     |
| <b>Age, years</b>        | 72 [45-83]                    | 69 [52-80]                    | 67 [56-77]                  | 66 [55-75]                  | 63 [53-72]                  | 60 [50-68]                | 67 [54-77]     |
| <b>Follow-up, years</b>  | 5.5 [1.6-8.6]                 | 7.4 [4.7-10.4]                | 7.9 [5.5-10.8]              | 7.9 [5.7-10.6]              | 7.8 [5.7-10.4]              | 7.7 [5.6-10.1]            | 7.7 [5.3-10.5] |
|                          | Aortic root diameter          |                               |                             |                             |                             |                           |                |
|                          | BMI <18.5 kg/m <sup>2</sup>   | BMI 18.5-25 kg/m <sup>2</sup> | BMI 25-30 kg/m <sup>2</sup> | BMI 30-35 kg/m <sup>2</sup> | BMI 35-40 kg/m <sup>2</sup> | BMI ≥40 kg/m <sup>2</sup> | All            |
| <b>Subjects, n (%)</b>   | 4773 (2)                      | 64890 (33)                    | 68263 (35)                  | 35731 (18)                  | 13498 (7)                   | 7983 (4)                  | 195138 (100)   |
| <b>Events, n (%)</b>     | 541 (11.3)                    | 5104 (7.9)                    | 3867 (5.7)                  | 1788 (5.0)                  | 673 (5.0)                   | 383 (4.8)                 | 12356 (6.3)    |
| <b>Female sex, n (%)</b> | 3272 (69)                     | 35236 (54)                    | 27404 (40)                  | 16425 (46)                  | 7352 (55)                   | 5029 (63)                 | 94718 (49)     |
| <b>Age, years</b>        | 68 [41-81]                    | 64 [46-78]                    | 64 [52-75]                  | 63 [52-73]                  | 61 [51-70]                  | 58 [48-67]                | 63 [50-75]     |
| <b>Follow-up, years</b>  | 5.9 [2.1-9.6]                 | 7.4 [5.1-10.9]                | 7.7 [5.6-11]                | 7.8 [5.7-10.9]              | 7.7 [5.7-10.7]              | 7.4 [5.5-10.3]            | 7.6 [5.4-10.9] |

**Supplementary table 1.** Subject characteristics for patients with available follow-up data for the respective cardiac or aortic measures. RA = right atrial, RV = right ventricular, RVOT = right ventricular outflow tract, LA = left atrial, LV = left ventricular, IVS = interventricular septum.

|                          | <b>Ascending aorta diameter</b>      |                                     |                                   |                                   |                                   |                                 |               |
|--------------------------|--------------------------------------|-------------------------------------|-----------------------------------|-----------------------------------|-----------------------------------|---------------------------------|---------------|
|                          | <b>BMI &lt;18.5 kg/m<sup>2</sup></b> | <b>BMI 18.5-25 kg/m<sup>2</sup></b> | <b>BMI 25-30 kg/m<sup>2</sup></b> | <b>BMI 30-35 kg/m<sup>2</sup></b> | <b>BMI 35-40 kg/m<sup>2</sup></b> | <b>BMI ≥40 kg/m<sup>2</sup></b> | <b>All</b>    |
| <b>Subjects, n (%)</b>   | 2693 (3)                             | 30316 (30)                          | 34761 (34)                        | 20283 (20)                        | 8117 (8)                          | 5219 (5)                        | 101389 (100)  |
| <b>Events, n (%)</b>     | 295 (11.0)                           | 2977 (9.8)                          | 2610 (7.5)                        | 1355 (6.7)                        | 539 (6.6)                         | 358 (6.9)                       | 8134 (8.0)    |
| <b>Female sex, n (%)</b> | 1770 (66)                            | 15311 (51)                          | 13455 (39)                        | 8743 (43)                         | 4033 (50)                         | 3101 (59)                       | 46413 (46)    |
| <b>Age, years</b>        | 66 [43-80]                           | 67 [49-79]                          | 66 [54-77]                        | 65 [54-74]                        | 62 [52-71]                        | 59 [49-68]                      | 65 [52-76]    |
| <b>Follow-up, years</b>  | 5.9 [1.9-9.6]                        | 6.5 [3.6-9.3]                       | 6.9 [5.1-9.8]                     | 7 [5.2-9.7]                       | 6.9 [5.2-9.6]                     | 6.7 [5.2-9.2]                   | 6.8 [4.9-9.6] |
|                          | <b>Aortic arch diameter</b>          |                                     |                                   |                                   |                                   |                                 |               |
|                          | <b>BMI &lt;18.5 kg/m<sup>2</sup></b> | <b>BMI 18.5-25 kg/m<sup>2</sup></b> | <b>BMI 25-30 kg/m<sup>2</sup></b> | <b>BMI 30-35 kg/m<sup>2</sup></b> | <b>BMI 35-40 kg/m<sup>2</sup></b> | <b>BMI ≥40 kg/m<sup>2</sup></b> | <b>All</b>    |
| <b>Subjects, n (%)</b>   | 454 (3)                              | 5127 (30)                           | 5861 (35)                         | 3324 (20)                         | 1318 (8)                          | 763 (5)                         | 16847 (100)   |
| <b>Events, n (%)</b>     | 43 (9.5)                             | 440 (8.6)                           | 363 (6.2)                         | 183 (5.5)                         | 77 (5.8)                          | 52 (6.8)                        | 1158 (6.9)    |
| <b>Female sex, n (%)</b> | 303 (67)                             | 2532 (49)                           | 2135 (36)                         | 1303 (39)                         | 638 (48)                          | 452 (59)                        | 7363 (44)     |
| <b>Age, years</b>        | 52 [26-77]                           | 63 [42-77]                          | 64 [51-75]                        | 62 [50-72]                        | 61 [50-69]                        | 57 [47-66]                      | 63 [48-74]    |
| <b>Follow-up, years</b>  | 5.8 [2.1-8.7]                        | 6.6 [4.8-9]                         | 6.7 [5.3-9.1]                     | 6.9 [5.4-9.1]                     | 6.7 [5.3-8.9]                     | 6.6 [5.2-8.5]                   | 6.7 [5.2-9]   |

**Supplementary Table 2.** Statistical analyses for 5-year cardiovascular mortality for aorta at sinotubular diameter indexed by different metrics.

BSA = body surface area, [M] = Mosteller, [DB] = Du Bois, LBM = lean body mass, [H] = Hume, [B] = Boer, [J] = James, BMI = body mass index.

|                              | C statistic                 |                               |                           | Hazard Ratio per 1 SD increment |                               |                           | p value                     |                               |                           |
|------------------------------|-----------------------------|-------------------------------|---------------------------|---------------------------------|-------------------------------|---------------------------|-----------------------------|-------------------------------|---------------------------|
|                              | BMI <18.5 kg/m <sup>2</sup> | BMI 18.5-30 kg/m <sup>2</sup> | BMI ≥30 kg/m <sup>2</sup> | BMI <18.5 kg/m <sup>2</sup>     | BMI 18.5-30 kg/m <sup>2</sup> | BMI ≥30 kg/m <sup>2</sup> | BMI <18.5 kg/m <sup>2</sup> | BMI 18.5-30 kg/m <sup>2</sup> | BMI ≥30 kg/m <sup>2</sup> |
| <b>Weight</b>                | 0.573 [0.532-0.613]         | 0.554 [0.544-0.565]           | 0.498 [0.480-0.516]       | 1.23 [1.11-1.35]                | 1.28 [1.23-1.32]              | 1.02 [0.94-1.11]          | <0.0001                     | <0.0001                       | 0.63                      |
| <b>Weight<sup>1.5</sup></b>  | 0.589 [0.549-0.628]         | 0.570 [0.560-0.580]           | 0.508 [0.491-0.526]       | 1.21 [1.11-1.32]                | 1.33 [1.29-1.38]              | 1.10 [0.98-1.22]          | <0.0001                     | <0.0001                       | 0.10                      |
| <b>Height*Weight</b>         | 0.585 [0.546-0.625]         | 0.562 [0.551-0.572]           | 0.508 [0.491-0.526]       | 1.24 [1.12-1.36]                | 1.28 [1.24-1.33]              | 1.07 [0.99-1.17]          | <0.0001                     | <0.0001                       | 0.10                      |
| <b>BSA[M]<sup>1.5</sup></b>  | 0.574 [0.534-0.614]         | 0.550 [0.539-0.560]           | 0.500 [0.482-0.518]       | 1.23 [1.12-1.37]                | 1.24 [1.20-1.29]              | 1.03 [0.96-1.11]          | <0.0001                     | <0.0001                       | 0.44                      |
| <b>BSA[DB]<sup>1.5</sup></b> | 0.574 [0.534-0.614]         | 0.547 [0.537-0.558]           | 0.501 [0.484-0.519]       | 1.24 [1.12-1.37]                | 1.23 [1.19-1.27]              | 1.03 [0.96-1.11]          | <0.0001                     | <0.0001                       | 0.37                      |
| <b>BSA[M]</b>                | 0.558 [0.517-0.598]         | 0.532 [0.522-0.543]           | 0.509 [0.490-0.527]       | 1.21 [1.09-1.35]                | 1.17 [1.13-1.21]              | 0.98 [0.92-1.05]          | 0.0004                      | <0.0001                       | 0.66                      |
| <b>BSA[DB]</b>               | 0.558 [0.517-0.599]         | 0.530 [0.520-0.541]           | 0.508 [0.489-0.526]       | 1.22 [1.09-1.36]                | 1.16 [1.12-1.20]              | 0.99 [0.93-1.06]          | 0.0004                      | <0.0001                       | 0.73                      |
| <b>LBM[H]</b>                | 0.569 [0.529-0.609]         | 0.535 [0.525-0.545]           | 0.495 [0.478-0.513]       | 1.25 [1.12-1.39]                | 1.17 [1.14-1.21]              | 1.00 [0.94-1.07]          | <0.0001                     | <0.0001                       | 0.89                      |
| <b>LBM[B]</b>                | 0.569 [0.529-0.609]         | 0.532 [0.521-0.542]           | 0.511 [0.493-0.528]       | 1.27 [1.13-1.42]                | 1.16 [1.12-1.20]              | 0.98 [0.92-1.04]          | <0.0001                     | <0.0001                       | 0.54                      |
| <b>LBM[J]</b>                | 0.566 [0.526-0.606]         | 0.533 [0.523-0.543]           | 0.487 [0.469-0.504]       | 1.24 [1.11-1.39]                | 1.18 [1.13-1.22]              | 1.00 [0.95-1.06]          | 0.0001                      | <0.0001                       | 0.89                      |
| <b>BMI</b>                   | 0.526 [0.484-0.568]         | 0.525 [0.514-0.536]           | 0.525 [0.507-0.543]       | 1.13 [1.01-1.26]                | 1.15 [1.11-1.20]              | 0.90 [0.82-0.98]          | 0.028                       | <0.0001                       | 0.016                     |
| <b>Height<sup>2.7</sup></b>  | 0.569 [0.530-0.609]         | 0.528 [0.518-0.538]           | 0.504 [0.486-0.522]       | 1.29 [1.14-1.47]                | 1.15 [1.11-1.19]              | 1.03 [0.98-1.09]          | <0.0001                     | <0.0001                       | 0.25                      |
| <b>Height<sup>2.13</sup></b> | 0.561 [0.521-0.601]         | 0.520 [0.510-0.531]           | 0.498 [0.480-0.516]       | 1.27 [1.12-1.45]                | 1.12 [1.09-1.17]              | 1.01 [0.96-1.07]          | 0.0002                      | <0.0001                       | 0.69                      |
| <b>Height<sup>2</sup></b>    | 0.560 [0.520-0.600]         | 0.518 [0.508-0.529]           | 0.497 [0.479-0.514]       | 1.27 [1.11-1.44]                | 1.12 [1.08-1.16]              | 1.01 [0.95-1.07]          | 0.0003                      | <0.0001                       | 0.84                      |
| <b>Height<sup>1.5</sup></b>  | 0.551 [0.510-0.591]         | 0.511 [0.500-0.522]           | 0.508 [0.490-0.526]       | 1.24 [1.09-1.41]                | 1.08 [1.05-1.12]              | 0.98 [0.93-1.04]          | 0.0012                      | <0.0001                       | 0.54                      |
| <b>Height</b>                | 0.539 [0.498-0.581]         | 0.503 [0.492-0.514]           | 0.513 [0.495-0.531]       | 1.21 [1.06-1.37]                | 1.05 [1.01-1.08]              | 0.96 [0.90-1.01]          | 0.0055                      | 0.012                         | 0.13                      |
| <b>Unindexed</b>             | 0.514 [0.472-0.556]         | 0.514 [0.503-0.525]           | 0.526 [0.507-0.544]       | 1.12 [0.97-1.28]                | 0.97 [0.93-1.00]              | 0.91 [0.86-0.96]          | 0.12                        | 0.077                         | 0.0012                    |

**Supplementary Table 3.** Statistical analyses for 5-year cardiovascular mortality for aortic sinus diameter indexed by different metrics.

BSA = body surface area, [M] = Mosteller, [DB] = Du Bois, LBM = lean body mass, [H] = Hume, [B] = Boer, [J] = James, BMI = body mass index.

|                              | C statistic                 |                               |                           | Hazard Ratio per 1 SD increment |                               |                           | p value                     |                               |                           |
|------------------------------|-----------------------------|-------------------------------|---------------------------|---------------------------------|-------------------------------|---------------------------|-----------------------------|-------------------------------|---------------------------|
|                              | BMI <18.5 kg/m <sup>2</sup> | BMI 18.5-30 kg/m <sup>2</sup> | BMI ≥30 kg/m <sup>2</sup> | BMI <18.5 kg/m <sup>2</sup>     | BMI 18.5-30 kg/m <sup>2</sup> | BMI ≥30 kg/m <sup>2</sup> | BMI <18.5 kg/m <sup>2</sup> | BMI 18.5-30 kg/m <sup>2</sup> | BMI ≥30 kg/m <sup>2</sup> |
| <b>Weight</b>                | 0.640 [0.610-0.670]         | 0.645 [0.636-0.653]           | 0.562 [0.546-0.578]       | 1.36 [1.26-1.47]                | 1.76 [1.70-1.81]              | 1.47 [1.34-1.61]          | <0.0001                     | <0.0001                       | <0.0001                   |
| <b>Weight<sup>1.5</sup></b>  | 0.629 [0.598-0.659]         | 0.634 [0.625-0.642]           | 0.553 [0.537-0.570]       | 1.26 [1.18-1.34]                | 1.69 [1.64-1.74]              | 1.54 [1.38-1.72]          | <0.0001                     | <0.0001                       | <0.0001                   |
| <b>Height*Weight</b>         | 0.627 [0.597-0.658]         | 0.637 [0.629-0.645]           | 0.564 [0.547-0.580]       | 1.32 [1.22-1.42]                | 1.64 [1.60-1.69]              | 1.45 [1.34-1.57]          | <0.0001                     | <0.0001                       | <0.0001                   |
| <b>BSA[M]<sup>1.5</sup></b>  | 0.635 [0.605-0.665]         | 0.645 [0.637-0.653]           | 0.571 [0.554-0.587]       | 1.38 [1.27-1.49]                | 1.68 [1.63-1.73]              | 1.44 [1.34-1.56]          | <0.0001                     | <0.0001                       | <0.0001                   |
| <b>BSA[DB]<sup>1.5</sup></b> | 0.633 [0.603-0.663]         | 0.644 [0.635-0.652]           | 0.574 [0.557-0.590]       | 1.37 [1.27-1.49]                | 1.64 [1.59-1.68]              | 1.42 [1.33-1.52]          | <0.0001                     | <0.0001                       | <0.0001                   |
| <b>BSA[M]</b>                | 0.642 [0.613-0.672]         | 0.646 [0.638-0.654]           | 0.576 [0.560-0.593]       | 1.40 [1.29-1.53]                | 1.63 [1.59-1.68]              | 1.39 [1.30-1.48]          | <0.0001                     | <0.0001                       | <0.0001                   |
| <b>BSA[DB]</b>               | 0.641 [0.611-0.671]         | 0.645 [0.637-0.653]           | 0.579 [0.563-0.596]       | 1.40 [1.29-1.53]                | 1.60 [1.56-1.64]              | 1.38 [1.30-1.47]          | <0.0001                     | <0.0001                       | <0.0001                   |
| <b>LBM[H]</b>                | 0.624 [0.594-0.654]         | 0.628 [0.620-0.636]           | 0.564 [0.548-0.580]       | 1.36 [1.25-1.48]                | 1.52 [1.48-1.56]              | 1.32 [1.24-1.40]          | <0.0001                     | <0.0001                       | <0.0001                   |
| <b>LBM[B]</b>                | 0.626 [0.596-0.656]         | 0.617 [0.608-0.625]           | 0.543 [0.527-0.559]       | 1.39 [1.27-1.52]                | 1.48 [1.44-1.52]              | 1.22 [1.15-1.29]          | <0.0001                     | <0.0001                       | <0.0001                   |
| <b>LBM[J]</b>                | 0.626 [0.595-0.657]         | 0.619 [0.610-0.627]           | 0.546 [0.530-0.562]       | 1.38 [1.26-1.50]                | 1.57 [1.52-1.62]              | 1.07 [1.05-1.08]          | <0.0001                     | <0.0001                       | <0.0001                   |
| <b>BMI</b>                   | 0.624 [0.592-0.655]         | 0.615 [0.607-0.624]           | 0.533 [0.517-0.549]       | 1.28 [1.18-1.37]                | 1.61 [1.56-1.67]              | 1.20 [1.10-1.31]          | <0.0001                     | <0.0001                       | <0.0001                   |
| <b>Height<sup>2.7</sup></b>  | 0.620 [0.590-0.650]         | 0.618 [0.610-0.626]           | 0.580 [0.564-0.596]       | 1.42 [1.29-1.57]                | 1.46 [1.42-1.50]              | 1.27 [1.22-1.32]          | <0.0001                     | <0.0001                       | <0.0001                   |
| <b>Height<sup>2.13</sup></b> | 0.628 [0.598-0.658]         | 0.621 [0.613-0.629]           | 0.584 [0.568-0.601]       | 1.44 [1.31-1.59]                | 1.47 [1.43-1.51]              | 1.32 [1.26-1.37]          | <0.0001                     | <0.0001                       | <0.0001                   |
| <b>Height<sup>2</sup></b>    | 0.630 [0.600-0.659]         | 0.621 [0.613-0.630]           | 0.585 [0.569-0.601]       | 1.44 [1.31-1.59]                | 1.47 [1.43-1.51]              | 1.32 [1.27-1.39]          | <0.0001                     | <0.0001                       | <0.0001                   |
| <b>Height<sup>1.5</sup></b>  | 0.635 [0.605-0.664]         | 0.618 [0.610-0.626]           | 0.585 [0.569-0.601]       | 1.45 [1.32-1.60]                | 1.45 [1.41-1.49]              | 1.34 [1.28-1.41]          | <0.0001                     | <0.0001                       | <0.0001                   |
| <b>Height</b>                | 0.635 [0.606-0.665]         | 0.607 [0.599-0.616]           | 0.579 [0.563-0.596]       | 1.44 [1.31-1.59]                | 1.40 [1.37-1.44]              | 1.32 [1.25-1.39]          | <0.0001                     | <0.0001                       | <0.0001                   |
| <b>Unindexed</b>             | 0.613 [0.582-0.644]         | 0.568 [0.560-0.577]           | 0.552 [0.536-0.568]       | 1.36 [1.22-1.51]                | 1.26 [1.22-1.29]              | 1.20 [1.14-1.26]          | <0.0001                     | <0.0001                       | <0.0001                   |

**Supplementary Table 4.** Statistical analyses for 5-year cardiovascular mortality for aortic arch diameter indexed by different metrics.

BSA = body surface area, [M] = Mosteller, [DB] = Du Bois, LBM = lean body mass, [H] = Hume, [B] = Boer, [J] = James, BMI = body mass index.

|                              | C statistic                 |                               |                           | Hazard Ratio per 1 SD increment |                               |                           | p value                     |                               |                           |
|------------------------------|-----------------------------|-------------------------------|---------------------------|---------------------------------|-------------------------------|---------------------------|-----------------------------|-------------------------------|---------------------------|
|                              | BMI <18.5 kg/m <sup>2</sup> | BMI 18.5-30 kg/m <sup>2</sup> | BMI ≥30 kg/m <sup>2</sup> | BMI <18.5 kg/m <sup>2</sup>     | BMI 18.5-30 kg/m <sup>2</sup> | BMI ≥30 kg/m <sup>2</sup> | BMI <18.5 kg/m <sup>2</sup> | BMI 18.5-30 kg/m <sup>2</sup> | BMI ≥30 kg/m <sup>2</sup> |
| <b>Weight</b>                | 0.685 [0.613-0.757]         | 0.620 [0.601-0.640]           | 0.516 [0.483-0.549]       | 1.29 [1.12-1.49]                | 1.56 [1.46-1.66]              | 1.19 [1.01-1.40]          | 0.0006                      | <0.0001                       | 0.037                     |
| <b>Weight<sup>1.5</sup></b>  | 0.679 [0.607-0.750]         | 0.625 [0.605-0.644]           | 0.521 [0.488-0.554]       | 1.21 [1.07-1.37]                | 1.59 [1.49-1.69]              | 1.26 [1.02-1.54]          | 0.0021                      | <0.0001                       | 0.030                     |
| <b>Height*Weight</b>         | 0.679 [0.608-0.749]         | 0.627 [0.608-0.646]           | 0.527 [0.494-0.561]       | 1.25 [1.09-1.44]                | 1.54 [1.45-1.63]              | 1.27 [1.09-1.48]          | 0.0011                      | <0.0001                       | 0.0024                    |
| <b>BSA[M]<sup>1.5</sup></b>  | 0.682 [0.611-0.754]         | 0.622 [0.602-0.641]           | 0.523 [0.490-0.556]       | 1.30 [1.12-1.51]                | 1.52 [1.43-1.61]              | 1.23 [1.07-1.41]          | 0.0005                      | <0.0001                       | 0.0042                    |
| <b>BSA[DB]<sup>1.5</sup></b> | 0.682 [0.611-0.753]         | 0.622 [0.602-0.641]           | 0.526 [0.493-0.559]       | 1.31 [1.12-1.52]                | 1.50 [1.41-1.59]              | 1.24 [1.09-1.41]          | 0.0005                      | <0.0001                       | 0.0012                    |
| <b>BSA[M]</b>                | 0.678 [0.605-0.751]         | 0.608 [0.588-0.628]           | 0.516 [0.482-0.549]       | 1.35 [1.15-1.60]                | 1.46 [1.37-1.55]              | 1.18 [1.04-1.34]          | 0.0003                      | <0.0001                       | 0.011                     |
| <b>BSA[DB]</b>               | 0.677 [0.604-0.750]         | 0.608 [0.588-0.627]           | 0.518 [0.485-0.552]       | 1.36 [1.15-1.61]                | 1.45 [1.37-1.54]              | 1.19 [1.05-1.35]          | 0.0003                      | <0.0001                       | 0.0049                    |
| <b>LBM[H]</b>                | 0.676 [0.603-0.749]         | 0.612 [0.592-0.631]           | 0.523 [0.490-0.557]       | 1.32 [1.12-1.54]                | 1.44 [1.36-1.52]              | 1.22 [1.08-1.38]          | 0.0007                      | <0.0001                       | 0.001                     |
| <b>LBM[B]</b>                | 0.680 [0.607-0.752]         | 0.606 [0.586-0.626]           | 0.521 [0.488-0.555]       | 1.34 [1.13-1.59]                | 1.42 [1.34-1.50]              | 1.20 [1.07-1.34]          | 0.0006                      | <0.0001                       | 0.0019                    |
| <b>LBM[J]</b>                | 0.676 [0.603-0.749]         | 0.606 [0.586-0.626]           | 0.531 [0.497-0.564]       | 1.37 [1.14-1.64]                | 1.53 [1.43-1.64]              | 1.09 [1.06-1.11]          | 0.0006                      | <0.0001                       | <0.0001                   |
| <b>BMI</b>                   | 0.641 [0.558-0.723]         | 0.575 [0.555-0.596]           | 0.517 [0.484-0.550]       | 1.33 [1.12-1.58]                | 1.43 [1.33-1.53]              | 0.98 [0.83-1.15]          | 0.001                       | <0.0001                       | 0.77                      |
| <b>Height<sup>2.7</sup></b>  | 0.671 [0.598-0.743]         | 0.608 [0.589-0.628]           | 0.538 [0.505-0.571]       | 1.42 [1.16-1.74]                | 1.44 [1.35-1.53]              | 1.26 [1.15-1.38]          | 0.0008                      | <0.0001                       | <0.0001                   |
| <b>Height<sup>2.13</sup></b> | 0.670 [0.598-0.743]         | 0.602 [0.583-0.622]           | 0.532 [0.499-0.566]       | 1.44 [1.17-1.76]                | 1.42 [1.34-1.51]              | 1.26 [1.14-1.39]          | 0.0005                      | <0.0001                       | <0.0001                   |
| <b>Height<sup>2</sup></b>    | 0.671 [0.598-0.744]         | 0.601 [0.581-0.620]           | 0.531 [0.498-0.564]       | 1.44 [1.17-1.77]                | 1.42 [1.33-1.51]              | 1.26 [1.13-1.39]          | 0.0005                      | <0.0001                       | <0.0001                   |
| <b>Height<sup>1.5</sup></b>  | 0.669 [0.595-0.743]         | 0.591 [0.572-0.611]           | 0.525 [0.491-0.558]       | 1.47 [1.19-1.81]                | 1.39 [1.31-1.48]              | 1.23 [1.10-1.37]          | 0.0004                      | <0.0001                       | 0.0002                    |
| <b>Height</b>                | 0.661 [0.585-0.737]         | 0.579 [0.559-0.599]           | 0.517 [0.484-0.550]       | 1.49 [1.20-1.86]                | 1.35 [1.27-1.44]              | 1.18 [1.06-1.32]          | 0.0003                      | <0.0001                       | 0.0032                    |
| <b>Unindexed</b>             | 0.630 [0.549-0.712]         | 0.548 [0.528-0.569]           | 0.502 [0.469-0.535]       | 1.55 [1.20-2.00]                | 1.24 [1.16-1.32]              | 1.07 [0.96-1.20]          | 0.0007                      | <0.0001                       | 0.22                      |

**Supplementary Table 5.** Statistical analyses for 5-year cardiovascular mortality for aortic root diameter indexed by different metrics.

BSA = body surface area, [M] = Mosteller, [DB] = Du Bois, LBM = lean body mass, [H] = Hume, [B] = Boer, [J] = James, BMI = body mass index.

|                              | C statistic                 |                               |                           | Hazard Ratio per 1 SD increment |                               |                           | p value                     |                               |                           |
|------------------------------|-----------------------------|-------------------------------|---------------------------|---------------------------------|-------------------------------|---------------------------|-----------------------------|-------------------------------|---------------------------|
|                              | BMI <18.5 kg/m <sup>2</sup> | BMI 18.5-30 kg/m <sup>2</sup> | BMI ≥30 kg/m <sup>2</sup> | BMI <18.5 kg/m <sup>2</sup>     | BMI 18.5-30 kg/m <sup>2</sup> | BMI ≥30 kg/m <sup>2</sup> | BMI <18.5 kg/m <sup>2</sup> | BMI 18.5-30 kg/m <sup>2</sup> | BMI ≥30 kg/m <sup>2</sup> |
| <b>Weight</b>                | 0.631 [0.609-0.653]         | 0.626 [0.620-0.632]           | 0.568 [0.557-0.579]       | 1.23 [1.17-1.29]                | 1.65 [1.61-1.68]              | 1.50 [1.41-1.59]          | <0.0001                     | <0.0001                       | <0.0001                   |
| <b>Weight<sup>1.5</sup></b>  | 0.623 [0.601-0.646]         | 0.617 [0.611-0.623]           | 0.562 [0.551-0.573]       | 1.14 [1.10-1.19]                | 1.60 [1.57-1.64]              | 1.57 [1.47-1.67]          | <0.0001                     | <0.0001                       | <0.0001                   |
| <b>Height*Weight</b>         | 0.626 [0.603-0.648]         | 0.622 [0.616-0.627]           | 0.570 [0.559-0.580]       | 1.24 [1.18-1.30]                | 1.56 [1.53-1.60]              | 1.42 [1.36-1.48]          | <0.0001                     | <0.0001                       | <0.0001                   |
| <b>BSA[M]<sup>1.5</sup></b>  | 0.632 [0.610-0.655]         | 0.627 [0.622-0.633]           | 0.574 [0.563-0.584]       | 1.30 [1.23-1.37]                | 1.59 [1.56-1.62]              | 1.43 [1.37-1.50]          | <0.0001                     | <0.0001                       | <0.0001                   |
| <b>BSA[DB]<sup>1.5</sup></b> | 0.632 [0.610-0.655]         | 0.627 [0.621-0.632]           | 0.575 [0.565-0.586]       | 1.33 [1.25-1.40]                | 1.56 [1.53-1.59]              | 1.39 [1.34-1.45]          | <0.0001                     | <0.0001                       | <0.0001                   |
| <b>BSA[M]</b>                | 0.634 [0.612-0.656]         | 0.626 [0.620-0.632]           | 0.575 [0.564-0.586]       | 1.35 [1.28-1.44]                | 1.54 [1.51-1.57]              | 1.38 [1.33-1.44]          | <0.0001                     | <0.0001                       | <0.0001                   |
| <b>BSA[DB]</b>               | 0.635 [0.613-0.657]         | 0.625 [0.620-0.631]           | 0.577 [0.566-0.588]       | 1.37 [1.29-1.46]                | 1.52 [1.49-1.55]              | 1.37 [1.32-1.43]          | <0.0001                     | <0.0001                       | <0.0001                   |
| <b>LBM[H]</b>                | 0.626 [0.603-0.649]         | 0.612 [0.606-0.617]           | 0.565 [0.554-0.576]       | 1.38 [1.29-1.46]                | 1.43 [1.41-1.45]              | 1.29 [1.24-1.33]          | <0.0001                     | <0.0001                       | <0.0001                   |
| <b>LBM[B]</b>                | 0.627 [0.605-0.650]         | 0.600 [0.594-0.606]           | 0.546 [0.535-0.556]       | 1.41 [1.32-1.50]                | 1.39 [1.37-1.42]              | 1.21 [1.16-1.25]          | <0.0001                     | <0.0001                       | <0.0001                   |
| <b>LBM[J]</b>                | 0.617 [0.594-0.640]         | 0.601 [0.595-0.607]           | 0.544 [0.533-0.555]       | 1.27 [1.20-1.34]                | 1.47 [1.44-1.50]              | 1.07 [1.05-1.08]          | <0.0001                     | <0.0001                       | <0.0001                   |
| <b>BMI</b>                   | 0.595 [0.572-0.618]         | 0.596 [0.590-0.602]           | 0.543 [0.532-0.554]       | 1.15 [1.09-1.22]                | 1.51 [1.47-1.54]              | 1.27 [1.20-1.34]          | <0.0001                     | <0.0001                       | <0.0001                   |
| <b>Height<sup>2.7</sup></b>  | 0.633 [0.611-0.656]         | 0.608 [0.602-0.613]           | 0.579 [0.568-0.589]       | 1.50 [1.40-1.61]                | 1.43 [1.41-1.46]              | 1.25 [1.22-1.28]          | <0.0001                     | <0.0001                       | <0.0001                   |
| <b>Height<sup>2.13</sup></b> | 0.637 [0.614-0.660]         | 0.609 [0.604-0.615]           | 0.581 [0.570-0.591]       | 1.51 [1.41-1.63]                | 1.44 [1.41-1.46]              | 1.29 [1.25-1.33]          | <0.0001                     | <0.0001                       | <0.0001                   |
| <b>Height<sup>2</sup></b>    | 0.638 [0.615-0.660]         | 0.609 [0.604-0.615]           | 0.581 [0.570-0.591]       | 1.52 [1.41-1.63]                | 1.44 [1.41-1.46]              | 1.30 [1.26-1.34]          | <0.0001                     | <0.0001                       | <0.0001                   |
| <b>Height<sup>1.5</sup></b>  | 0.637 [0.615-0.659]         | 0.606 [0.600-0.611]           | 0.579 [0.568-0.589]       | 1.51 [1.40-1.63]                | 1.41 [1.39-1.44]              | 1.31 [1.27-1.35]          | <0.0001                     | <0.0001                       | <0.0001                   |
| <b>Height</b>                | 0.631 [0.608-0.654]         | 0.597 [0.591-0.602]           | 0.573 [0.562-0.584]       | 1.49 [1.38-1.60]                | 1.37 [1.35-1.40]              | 1.30 [1.25-1.34]          | <0.0001                     | <0.0001                       | <0.0001                   |
| <b>Unindexed</b>             | 0.599 [0.575-0.622]         | 0.566 [0.560-0.571]           | 0.551 [0.541-0.562]       | 1.36 [1.26-1.48]                | 1.25 [1.22-1.27]              | 1.20 [1.16-1.24]          | <0.0001                     | <0.0001                       | <0.0001                   |



**Supplementary Table 6.** Statistical analyses for 5-year cardiovascular mortality for ascending aorta diameter indexed by different metrics.

BSA = body surface area, [M] = Mosteller, [DB] = Du Bois, LBM = lean body mass, [H] = Hume, [B] = Boer, [J] = James, BMI = body mass index.

|                              | C statistic                 |                               |                           | Hazard Ratio per 1 SD increment |                               |                           | p value                     |                               |                           |
|------------------------------|-----------------------------|-------------------------------|---------------------------|---------------------------------|-------------------------------|---------------------------|-----------------------------|-------------------------------|---------------------------|
|                              | BMI <18.5 kg/m <sup>2</sup> | BMI 18.5-30 kg/m <sup>2</sup> | BMI ≥30 kg/m <sup>2</sup> | BMI <18.5 kg/m <sup>2</sup>     | BMI 18.5-30 kg/m <sup>2</sup> | BMI ≥30 kg/m <sup>2</sup> | BMI <18.5 kg/m <sup>2</sup> | BMI 18.5-30 kg/m <sup>2</sup> | BMI ≥30 kg/m <sup>2</sup> |
| <b>Weight</b>                | 0.559 [0.531-0.587]         | 0.629 [0.622-0.637]           | 0.583 [0.572-0.595]       | 1.07 [1.00-1.15]                | 1.64 [1.59-1.68]              | 1.49 [1.40-1.57]          | 0.044                       | <0.0001                       | <0.0001                   |
| <b>Weight<sup>1.5</sup></b>  | 0.555 [0.528-0.582]         | 0.627 [0.619-0.634]           | 0.578 [0.566-0.590]       | 1.01 [0.96-1.07]                | 1.64 [1.60-1.69]              | 1.65 [1.54-1.77]          | 0.57                        | <0.0001                       | <0.0001                   |
| <b>Height*Weight</b>         | 0.571 [0.543-0.598]         | 0.627 [0.620-0.635]           | 0.584 [0.572-0.595]       | 1.10 [1.03-1.17]                | 1.59 [1.55-1.63]              | 1.49 [1.41-1.57]          | 0.0061                      | <0.0001                       | <0.0001                   |
| <b>BSA[M]<sup>1.5</sup></b>  | 0.574 [0.545-0.602]         | 0.629 [0.622-0.637]           | 0.588 [0.576-0.599]       | 1.16 [1.07-1.26]                | 1.60 [1.56-1.64]              | 1.44 [1.37-1.51]          | 0.0004                      | <0.0001                       | <0.0001                   |
| <b>BSA[DB]<sup>1.5</sup></b> | 0.582 [0.553-0.611]         | 0.628 [0.621-0.636]           | 0.589 [0.578-0.601]       | 1.21 [1.11-1.33]                | 1.59 [1.54-1.63]              | 1.42 [1.35-1.48]          | <0.0001                     | <0.0001                       | <0.0001                   |
| <b>BSA[M]</b>                | 0.579 [0.550-0.608]         | 0.629 [0.621-0.636]           | 0.591 [0.580-0.603]       | 1.26 [1.14-1.40]                | 1.59 [1.54-1.63]              | 1.38 [1.32-1.45]          | <0.0001                     | <0.0001                       | <0.0001                   |
| <b>BSA[DB]</b>               | 0.586 [0.557-0.616]         | 0.628 [0.621-0.636]           | 0.593 [0.581-0.604]       | 1.32 [1.18-1.47]                | 1.58 [1.54-1.62]              | 1.38 [1.32-1.44]          | <0.0001                     | <0.0001                       | <0.0001                   |
| <b>LBM[H]</b>                | 0.608 [0.578-0.638]         | 0.622 [0.614-0.629]           | 0.584 [0.573-0.596]       | 1.39 [1.26-1.54]                | 1.52 [1.48-1.56]              | 1.36 [1.30-1.42]          | <0.0001                     | <0.0001                       | <0.0001                   |
| <b>LBM[B]</b>                | 0.609 [0.579-0.639]         | 0.616 [0.609-0.624]           | 0.575 [0.564-0.587]       | 1.42 [1.28-1.58]                | 1.50 [1.46-1.53]              | 1.32 [1.26-1.37]          | <0.0001                     | <0.0001                       | <0.0001                   |
| <b>LBM[J]</b>                | 0.570 [0.542-0.599]         | 0.617 [0.610-0.625]           | 0.577 [0.566-0.589]       | 1.16 [1.06-1.26]                | 1.57 [1.52-1.61]              | 1.14 [1.12-1.16]          | 0.0011                      | <0.0001                       | <0.0001                   |
| <b>BMI</b>                   | 0.529 [0.501-0.558]         | 0.615 [0.607-0.622]           | 0.570 [0.559-0.582]       | 1.01 [0.94-1.09]                | 1.57 [1.53-1.62]              | 1.39 [1.31-1.47]          | 0.82                        | <0.0001                       | <0.0001                   |
| <b>Height<sup>2.7</sup></b>  | 0.633 [0.603-0.664]         | 0.619 [0.611-0.626]           | 0.594 [0.583-0.606]       | 1.68 [1.48-1.90]                | 1.53 [1.49-1.57]              | 1.32 [1.28-1.37]          | <0.0001                     | <0.0001                       | <0.0001                   |
| <b>Height<sup>2.13</sup></b> | 0.630 [0.600-0.660]         | 0.620 [0.613-0.627]           | 0.596 [0.585-0.608]       | 1.71 [1.50-1.95]                | 1.54 [1.50-1.59]              | 1.33 [1.28-1.39]          | <0.0001                     | <0.0001                       | <0.0001                   |
| <b>Height<sup>2</sup></b>    | 0.629 [0.599-0.659]         | 0.620 [0.613-0.628]           | 0.597 [0.585-0.608]       | 1.71 [1.50-1.96]                | 1.54 [1.50-1.59]              | 1.33 [1.28-1.39]          | <0.0001                     | <0.0001                       | <0.0001                   |
| <b>Height<sup>1.5</sup></b>  | 0.624 [0.593-0.654]         | 0.620 [0.613-0.627]           | 0.597 [0.586-0.609]       | 1.72 [1.50-1.98]                | 1.54 [1.49-1.58]              | 1.33 [1.28-1.39]          | <0.0001                     | <0.0001                       | <0.0001                   |
| <b>Height</b>                | 0.616 [0.586-0.647]         | 0.617 [0.610-0.624]           | 0.596 [0.584-0.608]       | 1.70 [1.47-1.96]                | 1.52 [1.47-1.56]              | 1.32 [1.27-1.38]          | <0.0001                     | <0.0001                       | <0.0001                   |
| <b>Unindexed</b>             | 0.594 [0.562-0.625]         | 0.602 [0.595-0.610]           | 0.585 [0.573-0.596]       | 1.56 [1.34-1.81]                | 1.44 [1.40-1.49]              | 1.29 [1.23-1.34]          | <0.0001                     | <0.0001                       | <0.0001                   |

**Supplementary Table 7.** Statistical analyses for 5-year cardiovascular mortality for IVS thickness indexed by different metrics.

BSA = body surface area, [M] = Mosteller, [DB] = Du Bois, LBM = lean body mass, [H] = Hume, [B] = Boer, [J] = James, BMI = body mass index.

|                              | C statistic                 |                               |                           | Hazard Ratio per 1 SD increment |                               |                           | p value                     |                               |                           |
|------------------------------|-----------------------------|-------------------------------|---------------------------|---------------------------------|-------------------------------|---------------------------|-----------------------------|-------------------------------|---------------------------|
|                              | BMI <18.5 kg/m <sup>2</sup> | BMI 18.5-30 kg/m <sup>2</sup> | BMI ≥30 kg/m <sup>2</sup> | BMI <18.5 kg/m <sup>2</sup>     | BMI 18.5-30 kg/m <sup>2</sup> | BMI ≥30 kg/m <sup>2</sup> | BMI <18.5 kg/m <sup>2</sup> | BMI 18.5-30 kg/m <sup>2</sup> | BMI ≥30 kg/m <sup>2</sup> |
| <b>Weight</b>                | 0.677 [0.658-0.695]         | 0.695 [0.690-0.700]           | 0.617 [0.608-0.627]       | 1.30 [1.26-1.35]                | 1.67 [1.65-1.69]              | 1.71 [1.65-1.78]          | <0.0001                     | <0.0001                       | <0.0001                   |
| <b>Weight<sup>1.5</sup></b>  | 0.654 [0.635-0.672]         | 0.677 [0.672-0.682]           | 0.602 [0.593-0.612]       | 1.17 [1.14-1.21]                | 1.71 [1.69-1.73]              | 1.87 [1.79-1.96]          | <0.0001                     | <0.0001                       | <0.0001                   |
| <b>Height*Weight</b>         | 0.671 [0.652-0.690]         | 0.683 [0.678-0.688]           | 0.611 [0.602-0.621]       | 1.30 [1.26-1.34]                | 1.64 [1.62-1.65]              | 1.62 [1.57-1.68]          | <0.0001                     | <0.0001                       | <0.0001                   |
| <b>BSA[M]<sup>1.5</sup></b>  | 0.686 [0.667-0.705]         | 0.694 [0.689-0.699]           | 0.621 [0.612-0.631]       | 1.37 [1.32-1.42]                | 1.62 [1.61-1.64]              | 1.60 [1.55-1.66]          | <0.0001                     | <0.0001                       | <0.0001                   |
| <b>BSA[DB]<sup>1.5</sup></b> | 0.690 [0.671-0.709]         | 0.692 [0.687-0.697]           | 0.623 [0.613-0.632]       | 1.40 [1.35-1.45]                | 1.61 [1.59-1.63]              | 1.56 [1.52-1.61]          | <0.0001                     | <0.0001                       | <0.0001                   |
| <b>BSA[M]</b>                | 0.701 [0.682-0.720]         | 0.699 [0.694-0.704]           | 0.630 [0.620-0.639]       | 1.43 [1.38-1.48]                | 1.60 [1.58-1.61]              | 1.55 [1.50-1.59]          | <0.0001                     | <0.0001                       | <0.0001                   |
| <b>BSA[DB]</b>               | 0.704 [0.685-0.723]         | 0.698 [0.693-0.703]           | 0.631 [0.621-0.640]       | 1.45 [1.39-1.50]                | 1.59 [1.57-1.61]              | 1.53 [1.49-1.57]          | <0.0001                     | <0.0001                       | <0.0001                   |
| <b>LBM[H]</b>                | 0.698 [0.679-0.717]         | 0.680 [0.675-0.685]           | 0.614 [0.604-0.623]       | 1.44 [1.39-1.49]                | 1.55 [1.54-1.57]              | 1.46 [1.43-1.50]          | <0.0001                     | <0.0001                       | <0.0001                   |
| <b>LBM[B]</b>                | 0.700 [0.681-0.719]         | 0.671 [0.666-0.676]           | 0.595 [0.585-0.605]       | 1.46 [1.41-1.52]                | 1.54 [1.52-1.56]              | 1.39 [1.36-1.43]          | <0.0001                     | <0.0001                       | <0.0001                   |
| <b>LBM[J]</b>                | 0.677 [0.658-0.697]         | 0.673 [0.668-0.678]           | 0.596 [0.587-0.605]       | 1.39 [1.33-1.44]                | 1.61 [1.59-1.63]              | 1.12 [1.11-1.13]          | <0.0001                     | <0.0001                       | <0.0001                   |
| <b>BMI</b>                   | 0.668 [0.649-0.687]         | 0.691 [0.686-0.696]           | 0.606 [0.597-0.616]       | 1.27 [1.23-1.32]                | 1.65 [1.63-1.67]              | 1.62 [1.56-1.68]          | <0.0001                     | <0.0001                       | <0.0001                   |
| <b>Height<sup>2.7</sup></b>  | 0.708 [0.689-0.727]         | 0.675 [0.670-0.681]           | 0.622 [0.613-0.632]       | 1.58 [1.52-1.65]                | 1.59 [1.57-1.61]              | 1.40 [1.37-1.43]          | <0.0001                     | <0.0001                       | <0.0001                   |
| <b>Height<sup>2.13</sup></b> | 0.714 [0.695-0.733]         | 0.682 [0.676-0.687]           | 0.628 [0.619-0.638]       | 1.58 [1.52-1.65]                | 1.59 [1.57-1.61]              | 1.44 [1.41-1.48]          | <0.0001                     | <0.0001                       | <0.0001                   |
| <b>Height<sup>2</sup></b>    | 0.715 [0.697-0.734]         | 0.683 [0.678-0.688]           | 0.629 [0.620-0.639]       | 1.58 [1.52-1.65]                | 1.59 [1.57-1.61]              | 1.45 [1.41-1.48]          | <0.0001                     | <0.0001                       | <0.0001                   |
| <b>Height<sup>1.5</sup></b>  | 0.718 [0.700-0.737]         | 0.685 [0.680-0.690]           | 0.633 [0.623-0.642]       | 1.59 [1.52-1.65]                | 1.59 [1.57-1.61]              | 1.46 [1.43-1.50]          | <0.0001                     | <0.0001                       | <0.0001                   |
| <b>Height</b>                | 0.719 [0.700-0.738]         | 0.685 [0.680-0.690]           | 0.633 [0.624-0.642]       | 1.59 [1.52-1.65]                | 1.58 [1.56-1.60]              | 1.46 [1.43-1.50]          | <0.0001                     | <0.0001                       | <0.0001                   |
| <b>Unindexed</b>             | 0.710 [0.690-0.729]         | 0.672 [0.666-0.677]           | 0.623 [0.614-0.632]       | 1.58 [1.52-1.65]                | 1.54 [1.52-1.56]              | 1.43 [1.39-1.46]          | <0.0001                     | <0.0001                       | <0.0001                   |

**Supplementary Table 8.** Statistical analyses for 5-year cardiovascular mortality for LA area indexed by different metrics.

BSA = body surface area, [M] = Mosteller, [DB] = Du Bois, LBM = lean body mass, [H] = Hume, [B] = Boer, [J] = James, BMI = body mass index.

|                              | C statistic                 |                               |                           | Hazard Ratio per 1 SD increment |                               |                           | p value                     |                               |                           |
|------------------------------|-----------------------------|-------------------------------|---------------------------|---------------------------------|-------------------------------|---------------------------|-----------------------------|-------------------------------|---------------------------|
|                              | BMI <18.5 kg/m <sup>2</sup> | BMI 18.5-30 kg/m <sup>2</sup> | BMI ≥30 kg/m <sup>2</sup> | BMI <18.5 kg/m <sup>2</sup>     | BMI 18.5-30 kg/m <sup>2</sup> | BMI ≥30 kg/m <sup>2</sup> | BMI <18.5 kg/m <sup>2</sup> | BMI 18.5-30 kg/m <sup>2</sup> | BMI ≥30 kg/m <sup>2</sup> |
| <b>Weight</b>                | 0.734 [0.706-0.762]         | 0.705 [0.698-0.713]           | 0.626 [0.613-0.639]       | 1.24 [1.21-1.28]                | 1.43 [1.42-1.45]              | 1.76 [1.68-1.84]          | <0.0001                     | <0.0001                       | <0.0001                   |
| <b>Weight<sup>1.5</sup></b>  | 0.731 [0.704-0.759]         | 0.697 [0.690-0.705]           | 0.618 [0.605-0.631]       | 1.22 [1.19-1.25]                | 1.51 [1.50-1.53]              | 1.96 [1.86-2.08]          | <0.0001                     | <0.0001                       | <0.0001                   |
| <b>Height*Weight</b>         | 0.731 [0.703-0.758]         | 0.703 [0.695-0.710]           | 0.627 [0.614-0.640]       | 1.26 [1.23-1.29]                | 1.46 [1.45-1.48]              | 1.75 [1.67-1.83]          | <0.0001                     | <0.0001                       | <0.0001                   |
| <b>BSA[M]<sup>1.5</sup></b>  | 0.732 [0.705-0.760]         | 0.706 [0.698-0.713]           | 0.631 [0.618-0.644]       | 1.27 [1.24-1.31]                | 1.41 [1.40-1.43]              | 1.68 [1.62-1.75]          | <0.0001                     | <0.0001                       | <0.0001                   |
| <b>BSA[DB]<sup>1.5</sup></b> | 0.732 [0.704-0.759]         | 0.706 [0.698-0.713]           | 0.633 [0.620-0.645]       | 1.29 [1.25-1.33]                | 1.41 [1.39-1.42]              | 1.65 [1.59-1.71]          | <0.0001                     | <0.0001                       | <0.0001                   |
| <b>BSA[M]</b>                | 0.731 [0.703-0.759]         | 0.704 [0.696-0.711]           | 0.632 [0.619-0.645]       | 1.29 [1.25-1.33]                | 1.37 [1.36-1.38]              | 1.61 [1.55-1.67]          | <0.0001                     | <0.0001                       | <0.0001                   |
| <b>BSA[DB]</b>               | 0.731 [0.703-0.759]         | 0.703 [0.696-0.711]           | 0.633 [0.621-0.646]       | 1.30 [1.27-1.34]                | 1.37 [1.35-1.38]              | 1.59 [1.54-1.65]          | <0.0001                     | <0.0001                       | <0.0001                   |
| <b>LBM[H]</b>                | 0.726 [0.698-0.754]         | 0.699 [0.691-0.706]           | 0.627 [0.615-0.640]       | 1.34 [1.30-1.39]                | 1.41 [1.39-1.42]              | 1.59 [1.53-1.65]          | <0.0001                     | <0.0001                       | <0.0001                   |
| <b>LBM[B]</b>                | 0.727 [0.699-0.755]         | 0.693 [0.686-0.701]           | 0.616 [0.603-0.628]       | 1.35 [1.30-1.39]                | 1.43 [1.41-1.44]              | 1.52 [1.47-1.58]          | <0.0001                     | <0.0001                       | <0.0001                   |
| <b>LBM[J]</b>                | 0.726 [0.698-0.754]         | 0.695 [0.687-0.702]           | 0.615 [0.602-0.628]       | 1.32 [1.28-1.37]                | 1.46 [1.44-1.48]              | 1.11 [1.09-1.12]          | <0.0001                     | <0.0001                       | <0.0001                   |
| <b>BMI</b>                   | 0.724 [0.695-0.753]         | 0.690 [0.683-0.698]           | 0.611 [0.598-0.623]       | 1.23 [1.20-1.26]                | 1.37 [1.36-1.39]              | 1.64 [1.56-1.71]          | <0.0001                     | <0.0001                       | <0.0001                   |
| <b>Height<sup>2.7</sup></b>  | 0.725 [0.697-0.753]         | 0.697 [0.690-0.705]           | 0.635 [0.623-0.648]       | 1.45 [1.39-1.51]                | 1.41 [1.39-1.42]              | 1.48 [1.44-1.53]          | <0.0001                     | <0.0001                       | <0.0001                   |
| <b>Height<sup>2.13</sup></b> | 0.727 [0.698-0.755]         | 0.698 [0.690-0.705]           | 0.636 [0.624-0.649]       | 1.43 [1.37-1.48]                | 1.39 [1.37-1.40]              | 1.50 [1.46-1.55]          | <0.0001                     | <0.0001                       | <0.0001                   |
| <b>Height<sup>2</sup></b>    | 0.727 [0.699-0.755]         | 0.697 [0.690-0.705]           | 0.636 [0.624-0.649]       | 1.42 [1.37-1.48]                | 1.38 [1.37-1.39]              | 1.51 [1.46-1.55]          | <0.0001                     | <0.0001                       | <0.0001                   |
| <b>Height<sup>1.5</sup></b>  | 0.727 [0.698-0.755]         | 0.695 [0.688-0.703]           | 0.635 [0.622-0.647]       | 1.40 [1.35-1.46]                | 1.37 [1.35-1.38]              | 1.51 [1.46-1.55]          | <0.0001                     | <0.0001                       | <0.0001                   |
| <b>Height</b>                | 0.725 [0.697-0.754]         | 0.692 [0.684-0.699]           | 0.632 [0.619-0.644]       | 1.39 [1.33-1.44]                | 1.35 [1.34-1.37]              | 1.50 [1.46-1.55]          | <0.0001                     | <0.0001                       | <0.0001                   |
| <b>Unindexed</b>             | 0.718 [0.688-0.747]         | 0.679 [0.671-0.686]           | 0.622 [0.609-0.634]       | 1.36 [1.31-1.41]                | 1.34 [1.33-1.35]              | 1.47 [1.42-1.51]          | <0.0001                     | <0.0001                       | <0.0001                   |

**Supplementary Table 9.** Statistical analyses for 5-year cardiovascular mortality for LA diameter indexed by different metrics.

BSA = body surface area, [M] = Mosteller, [DB] = Du Bois, LBM = lean body mass, [H] = Hume, [B] = Boer, [J] = James, BMI = body mass index.

|                              | C statistic                 |                               |                           | Hazard Ratio per 1 SD increment |                               |                           | p value                     |                               |                           |
|------------------------------|-----------------------------|-------------------------------|---------------------------|---------------------------------|-------------------------------|---------------------------|-----------------------------|-------------------------------|---------------------------|
|                              | BMI <18.5 kg/m <sup>2</sup> | BMI 18.5-30 kg/m <sup>2</sup> | BMI ≥30 kg/m <sup>2</sup> | BMI <18.5 kg/m <sup>2</sup>     | BMI 18.5-30 kg/m <sup>2</sup> | BMI ≥30 kg/m <sup>2</sup> | BMI <18.5 kg/m <sup>2</sup> | BMI 18.5-30 kg/m <sup>2</sup> | BMI ≥30 kg/m <sup>2</sup> |
| <b>Weight</b>                | 0.723 [0.690-0.755]         | 0.704 [0.696-0.712]           | 0.652 [0.637-0.666]       | 1.40 [1.33-1.48]                | 1.81 [1.77-1.84]              | 2.20 [2.06-2.35]          | <0.0001                     | <0.0001                       | <0.0001                   |
| <b>Weight<sup>1.5</sup></b>  | 0.714 [0.681-0.746]         | 0.680 [0.672-0.689]           | 0.628 [0.614-0.643]       | 1.25 [1.20-1.30]                | 1.73 [1.69-1.77]              | 2.34 [2.16-2.55]          | <0.0001                     | <0.0001                       | <0.0001                   |
| <b>Height*Weight</b>         | 0.721 [0.688-0.754]         | 0.691 [0.683-0.699]           | 0.640 [0.626-0.654]       | 1.41 [1.33-1.48]                | 1.69 [1.66-1.73]              | 1.98 [1.86-2.10]          | <0.0001                     | <0.0001                       | <0.0001                   |
| <b>BSA[M]<sup>1.5</sup></b>  | 0.728 [0.694-0.761]         | 0.705 [0.697-0.713]           | 0.656 [0.642-0.670]       | 1.49 [1.40-1.58]                | 1.76 [1.72-1.79]              | 2.00 [1.89-2.11]          | <0.0001                     | <0.0001                       | <0.0001                   |
| <b>BSA[DB]<sup>1.5</sup></b> | 0.729 [0.696-0.763]         | 0.704 [0.696-0.712]           | 0.657 [0.643-0.671]       | 1.52 [1.43-1.61]                | 1.74 [1.70-1.77]              | 1.91 [1.82-2.02]          | <0.0001                     | <0.0001                       | <0.0001                   |
| <b>BSA[M]</b>                | 0.729 [0.695-0.763]         | 0.713 [0.705-0.721]           | 0.671 [0.657-0.685]       | 1.56 [1.47-1.67]                | 1.81 [1.77-1.84]              | 1.98 [1.88-2.08]          | <0.0001                     | <0.0001                       | <0.0001                   |
| <b>BSA[DB]</b>               | 0.730 [0.697-0.764]         | 0.713 [0.705-0.721]           | 0.672 [0.658-0.686]       | 1.58 [1.48-1.69]                | 1.80 [1.76-1.84]              | 1.94 [1.85-2.04]          | <0.0001                     | <0.0001                       | <0.0001                   |
| <b>LBM[H]</b>                | 0.727 [0.693-0.762]         | 0.693 [0.685-0.701]           | 0.646 [0.632-0.660]       | 1.55 [1.46-1.65]                | 1.66 [1.63-1.69]              | 1.74 [1.66-1.83]          | <0.0001                     | <0.0001                       | <0.0001                   |
| <b>LBM[B]</b>                | 0.727 [0.693-0.761]         | 0.682 [0.674-0.690]           | 0.621 [0.607-0.635]       | 1.58 [1.49-1.68]                | 1.63 [1.60-1.67]              | 1.58 [1.51-1.66]          | <0.0001                     | <0.0001                       | <0.0001                   |
| <b>LBM[J]</b>                | 0.718 [0.685-0.752]         | 0.683 [0.675-0.692]           | 0.618 [0.604-0.632]       | 1.53 [1.43-1.63]                | 1.77 [1.73-1.81]              | 1.11 [1.10-1.13]          | <0.0001                     | <0.0001                       | <0.0001                   |
| <b>BMI</b>                   | 0.696 [0.662-0.730]         | 0.696 [0.688-0.704]           | 0.644 [0.630-0.659]       | 1.38 [1.29-1.47]                | 1.89 [1.84-1.93]              | 2.09 [1.96-2.23]          | <0.0001                     | <0.0001                       | <0.0001                   |
| <b>Height<sup>2.7</sup></b>  | 0.731 [0.697-0.766]         | 0.692 [0.684-0.700]           | 0.652 [0.638-0.666]       | 1.72 [1.60-1.85]                | 1.76 [1.72-1.80]              | 1.51 [1.46-1.56]          | <0.0001                     | <0.0001                       | <0.0001                   |
| <b>Height<sup>2.13</sup></b> | 0.733 [0.698-0.767]         | 0.699 [0.691-0.707]           | 0.663 [0.650-0.677]       | 1.74 [1.62-1.87]                | 1.81 [1.77-1.85]              | 1.66 [1.60-1.72]          | <0.0001                     | <0.0001                       | <0.0001                   |
| <b>Height<sup>2</sup></b>    | 0.732 [0.698-0.767]         | 0.700 [0.692-0.708]           | 0.666 [0.652-0.679]       | 1.74 [1.62-1.87]                | 1.82 [1.77-1.86]              | 1.69 [1.63-1.76]          | <0.0001                     | <0.0001                       | <0.0001                   |
| <b>Height<sup>1.5</sup></b>  | 0.731 [0.696-0.765]         | 0.703 [0.695-0.711]           | 0.673 [0.659-0.687]       | 1.76 [1.63-1.90]                | 1.85 [1.80-1.89]              | 1.81 [1.73-1.89]          | <0.0001                     | <0.0001                       | <0.0001                   |
| <b>Height</b>                | 0.725 [0.690-0.760]         | 0.702 [0.693-0.710]           | 0.677 [0.663-0.690]       | 1.79 [1.65-1.93]                | 1.86 [1.81-1.90]              | 1.87 [1.78-1.95]          | <0.0001                     | <0.0001                       | <0.0001                   |
| <b>Unindexed</b>             | 0.704 [0.668-0.740]         | 0.686 [0.678-0.694]           | 0.667 [0.653-0.681]       | 1.83 [1.66-2.01]                | 1.79 [1.75-1.84]              | 1.80 [1.72-1.88]          | <0.0001                     | <0.0001                       | <0.0001                   |

**Supplementary Table 10.** Statistical analyses for 5-year cardiovascular mortality for LA volume indexed by different metrics.

BSA = body surface area, [M] = Mosteller, [DB] = Du Bois, LBM = lean body mass, [H] = Hume, [B] = Boer, [J] = James, BMI = body mass index.

|                              | C statistic                 |                               |                           | Hazard Ratio per 1 SD increment |                               |                           | p value                     |                               |                           |
|------------------------------|-----------------------------|-------------------------------|---------------------------|---------------------------------|-------------------------------|---------------------------|-----------------------------|-------------------------------|---------------------------|
|                              | BMI <18.5 kg/m <sup>2</sup> | BMI 18.5-30 kg/m <sup>2</sup> | BMI ≥30 kg/m <sup>2</sup> | BMI <18.5 kg/m <sup>2</sup>     | BMI 18.5-30 kg/m <sup>2</sup> | BMI ≥30 kg/m <sup>2</sup> | BMI <18.5 kg/m <sup>2</sup> | BMI 18.5-30 kg/m <sup>2</sup> | BMI ≥30 kg/m <sup>2</sup> |
| <b>Weight</b>                | 0.725 [0.703-0.747]         | 0.731 [0.726-0.737]           | 0.670 [0.660-0.681]       | 1.41 [1.36-1.47]                | 1.57 [1.55-1.59]              | 1.57 [1.51-1.62]          | <0.0001                     | <0.0001                       | <0.0001                   |
| <b>Weight<sup>1.5</sup></b>  | 0.726 [0.704-0.748]         | 0.733 [0.728-0.739]           | 0.667 [0.656-0.677]       | 1.33 [1.28-1.37]                | 1.55 [1.53-1.56]              | 1.69 [1.63-1.76]          | <0.0001                     | <0.0001                       | <0.0001                   |
| <b>Height*Weight</b>         | 0.724 [0.702-0.746]         | 0.733 [0.727-0.739]           | 0.672 [0.662-0.683]       | 1.39 [1.34-1.45]                | 1.56 [1.54-1.58]              | 1.57 [1.52-1.63]          | <0.0001                     | <0.0001                       | <0.0001                   |
| <b>BSA[M]<sup>1.5</sup></b>  | 0.724 [0.702-0.746]         | 0.731 [0.725-0.736]           | 0.673 [0.663-0.684]       | 1.45 [1.39-1.51]                | 1.58 [1.56-1.60]              | 1.52 [1.48-1.57]          | <0.0001                     | <0.0001                       | <0.0001                   |
| <b>BSA[DB]<sup>1.5</sup></b> | 0.723 [0.701-0.746]         | 0.730 [0.724-0.736]           | 0.674 [0.664-0.685]       | 1.47 [1.41-1.54]                | 1.58 [1.56-1.60]              | 1.51 [1.46-1.55]          | <0.0001                     | <0.0001                       | <0.0001                   |
| <b>BSA[M]</b>                | 0.722 [0.700-0.744]         | 0.726 [0.720-0.731]           | 0.672 [0.662-0.683]       | 1.53 [1.45-1.60]                | 1.59 [1.57-1.61]              | 1.48 [1.43-1.52]          | <0.0001                     | <0.0001                       | <0.0001                   |
| <b>BSA[DB]</b>               | 0.721 [0.699-0.744]         | 0.725 [0.719-0.731]           | 0.673 [0.663-0.683]       | 1.54 [1.47-1.62]                | 1.59 [1.57-1.62]              | 1.47 [1.43-1.51]          | <0.0001                     | <0.0001                       | <0.0001                   |
| <b>LBM[H]</b>                | 0.719 [0.696-0.741]         | 0.726 [0.720-0.731]           | 0.672 [0.661-0.682]       | 1.51 [1.44-1.59]                | 1.58 [1.56-1.60]              | 1.48 [1.44-1.52]          | <0.0001                     | <0.0001                       | <0.0001                   |
| <b>LBM[B]</b>                | 0.719 [0.697-0.742]         | 0.723 [0.718-0.729]           | 0.667 [0.656-0.677]       | 1.52 [1.45-1.59]                | 1.57 [1.55-1.59]              | 1.46 [1.42-1.50]          | <0.0001                     | <0.0001                       | <0.0001                   |
| <b>LBM[J]</b>                | 0.719 [0.697-0.742]         | 0.724 [0.718-0.730]           | 0.666 [0.656-0.677]       | 1.50 [1.43-1.57]                | 1.61 [1.59-1.63]              | 1.14 [1.13-1.15]          | <0.0001                     | <0.0001                       | <0.0001                   |
| <b>BMI</b>                   | 0.719 [0.696-0.741]         | 0.719 [0.713-0.725]           | 0.657 [0.647-0.668]       | 1.44 [1.38-1.50]                | 1.54 [1.52-1.57]              | 1.51 [1.46-1.56]          | <0.0001                     | <0.0001                       | <0.0001                   |
| <b>Height<sup>2.7</sup></b>  | 0.718 [0.696-0.741]         | 0.723 [0.717-0.729]           | 0.677 [0.666-0.687]       | 1.67 [1.57-1.77]                | 1.62 [1.60-1.64]              | 1.42 [1.38-1.46]          | <0.0001                     | <0.0001                       | <0.0001                   |
| <b>Height<sup>2.13</sup></b> | 0.719 [0.696-0.741]         | 0.721 [0.716-0.727]           | 0.676 [0.665-0.686]       | 1.68 [1.58-1.79]                | 1.62 [1.60-1.65]              | 1.42 [1.38-1.46]          | <0.0001                     | <0.0001                       | <0.0001                   |
| <b>Height<sup>2</sup></b>    | 0.718 [0.696-0.741]         | 0.721 [0.715-0.727]           | 0.675 [0.665-0.686]       | 1.69 [1.59-1.79]                | 1.62 [1.60-1.65]              | 1.42 [1.38-1.46]          | <0.0001                     | <0.0001                       | <0.0001                   |
| <b>Height<sup>1.5</sup></b>  | 0.718 [0.695-0.740]         | 0.719 [0.713-0.724]           | 0.673 [0.663-0.684]       | 1.70 [1.60-1.81]                | 1.62 [1.59-1.64]              | 1.42 [1.38-1.45]          | <0.0001                     | <0.0001                       | <0.0001                   |
| <b>Height</b>                | 0.716 [0.694-0.739]         | 0.715 [0.710-0.721]           | 0.671 [0.660-0.681]       | 1.71 [1.61-1.82]                | 1.61 [1.59-1.64]              | 1.41 [1.37-1.45]          | <0.0001                     | <0.0001                       | <0.0001                   |
| <b>Unindexed</b>             | 0.712 [0.689-0.735]         | 0.707 [0.701-0.713]           | 0.663 [0.653-0.674]       | 1.74 [1.63-1.85]                | 1.58 [1.56-1.61]              | 1.39 [1.35-1.43]          | <0.0001                     | <0.0001                       | <0.0001                   |

**Supplementary Table 11.** Statistical analyses for 5-year cardiovascular mortality for LV end-diastolic diameter indexed by different metrics.

BSA = body surface area, [M] = Mosteller, [DB] = Du Bois, LBM = lean body mass, [H] = Hume, [B] = Boer, [J] = James, BMI = body mass index.

|                              | C statistic                 |                               |                           | Hazard Ratio per 1 SD increment |                               |                           | p value                     |                               |                           |
|------------------------------|-----------------------------|-------------------------------|---------------------------|---------------------------------|-------------------------------|---------------------------|-----------------------------|-------------------------------|---------------------------|
|                              | BMI <18.5 kg/m <sup>2</sup> | BMI 18.5-30 kg/m <sup>2</sup> | BMI ≥30 kg/m <sup>2</sup> | BMI <18.5 kg/m <sup>2</sup>     | BMI 18.5-30 kg/m <sup>2</sup> | BMI ≥30 kg/m <sup>2</sup> | BMI <18.5 kg/m <sup>2</sup> | BMI 18.5-30 kg/m <sup>2</sup> | BMI ≥30 kg/m <sup>2</sup> |
| <b>Weight</b>                | 0.545 [0.523-0.568]         | 0.611 [0.605-0.617]           | 0.583 [0.573-0.593]       | 1.04 [1.00-1.09]                | 1.65 [1.62-1.68]              | 1.68 [1.61-1.75]          | 0.066                       | <0.0001                       | <0.0001                   |
| <b>Weight<sup>1.5</sup></b>  | 0.549 [0.528-0.569]         | 0.609 [0.604-0.615]           | 0.573 [0.563-0.583]       | 1.01 [0.97-1.04]                | 1.63 [1.59-1.66]              | 1.67 [1.59-1.75]          | 0.70                        | <0.0001                       | <0.0001                   |
| <b>Height*Weight</b>         | 0.552 [0.530-0.573]         | 0.611 [0.606-0.617]           | 0.582 [0.573-0.592]       | 1.07 [1.02-1.12]                | 1.57 [1.54-1.60]              | 1.41 [1.38-1.45]          | 0.0025                      | <0.0001                       | <0.0001                   |
| <b>BSA[M]<sup>1.5</sup></b>  | 0.550 [0.528-0.573]         | 0.611 [0.605-0.617]           | 0.590 [0.580-0.599]       | 1.10 [1.05-1.15]                | 1.59 [1.56-1.62]              | 1.48 [1.44-1.52]          | 0.0001                      | <0.0001                       | <0.0001                   |
| <b>BSA[DB]<sup>1.5</sup></b> | 0.554 [0.531-0.576]         | 0.610 [0.604-0.616]           | 0.592 [0.582-0.602]       | 1.13 [1.07-1.19]                | 1.56 [1.53-1.58]              | 1.40 [1.37-1.44]          | <0.0001                     | <0.0001                       | <0.0001                   |
| <b>BSA[M]</b>                | 0.547 [0.524-0.571]         | 0.603 [0.597-0.609]           | 0.593 [0.583-0.604]       | 1.13 [1.07-1.19]                | 1.55 [1.53-1.58]              | 1.53 [1.48-1.58]          | <0.0001                     | <0.0001                       | <0.0001                   |
| <b>BSA[DB]</b>               | 0.551 [0.527-0.575]         | 0.602 [0.596-0.608]           | 0.596 [0.586-0.606]       | 1.16 [1.10-1.22]                | 1.54 [1.51-1.56]              | 1.49 [1.45-1.53]          | <0.0001                     | <0.0001                       | <0.0001                   |
| <b>LBM[H]</b>                | 0.560 [0.537-0.584]         | 0.597 [0.591-0.603]           | 0.582 [0.573-0.592]       | 1.22 [1.16-1.29]                | 1.44 [1.42-1.46]              | 1.31 [1.28-1.34]          | <0.0001                     | <0.0001                       | <0.0001                   |
| <b>LBM[B]</b>                | 0.561 [0.538-0.585]         | 0.588 [0.582-0.594]           | 0.562 [0.552-0.572]       | 1.25 [1.17-1.32]                | 1.40 [1.38-1.43]              | 1.28 [1.24-1.31]          | <0.0001                     | <0.0001                       | <0.0001                   |
| <b>LBM[J]</b>                | 0.539 [0.517-0.562]         | 0.588 [0.582-0.594]           | 0.562 [0.552-0.571]       | 1.08 [1.02-1.14]                | 1.49 [1.46-1.52]              | 1.07 [1.06-1.08]          | 0.0038                      | <0.0001                       | <0.0001                   |
| <b>BMI</b>                   | 0.489 [0.466-0.513]         | 0.581 [0.575-0.587]           | 0.558 [0.548-0.568]       | 0.98 [0.93-1.02]                | 1.54 [1.51-1.57]              | 1.54 [1.47-1.62]          | 0.34                        | <0.0001                       | <0.0001                   |
| <b>Height<sup>2.7</sup></b>  | 0.578 [0.555-0.602]         | 0.595 [0.589-0.600]           | 0.596 [0.586-0.606]       | 1.37 [1.28-1.47]                | 1.46 [1.44-1.49]              | 1.22 [1.20-1.24]          | <0.0001                     | <0.0001                       | <0.0001                   |
| <b>Height<sup>2.13</sup></b> | 0.574 [0.550-0.598]         | 0.593 [0.587-0.599]           | 0.600 [0.590-0.610]       | 1.35 [1.27-1.45]                | 1.48 [1.46-1.51]              | 1.29 [1.27-1.31]          | <0.0001                     | <0.0001                       | <0.0001                   |
| <b>Height<sup>2</sup></b>    | 0.573 [0.549-0.598]         | 0.592 [0.586-0.598]           | 0.600 [0.590-0.610]       | 1.35 [1.26-1.44]                | 1.48 [1.46-1.51]              | 1.31 [1.29-1.33]          | <0.0001                     | <0.0001                       | <0.0001                   |
| <b>Height<sup>1.5</sup></b>  | 0.567 [0.542-0.592]         | 0.586 [0.580-0.592]           | 0.599 [0.589-0.610]       | 1.32 [1.24-1.41]                | 1.47 [1.45-1.50]              | 1.39 [1.36-1.42]          | <0.0001                     | <0.0001                       | <0.0001                   |
| <b>Height</b>                | 0.557 [0.532-0.583]         | 0.577 [0.570-0.583]           | 0.594 [0.583-0.604]       | 1.29 [1.20-1.38]                | 1.44 [1.41-1.46]              | 1.45 [1.41-1.49]          | <0.0001                     | <0.0001                       | <0.0001                   |
| <b>Unindexed</b>             | 0.533 [0.508-0.559]         | 0.553 [0.546-0.559]           | 0.572 [0.561-0.582]       | 1.19 [1.10-1.28]                | 1.31 [1.29-1.34]              | 1.38 [1.34-1.43]          | <0.0001                     | <0.0001                       | <0.0001                   |

**Supplementary Table 12.** Statistical analyses for 5-year cardiovascular mortality for LV end-diastolic volume indexed by different metrics.

BSA = body surface area, [M] = Mosteller, [DB] = Du Bois, LBM = lean body mass, [H] = Hume, [B] = Boer, [J] = James, BMI = body mass index.

|                              | C statistic                 |                               |                           | Hazard Ratio per 1 SD increment |                               |                           | p value                     |                               |                           |
|------------------------------|-----------------------------|-------------------------------|---------------------------|---------------------------------|-------------------------------|---------------------------|-----------------------------|-------------------------------|---------------------------|
|                              | BMI <18.5 kg/m <sup>2</sup> | BMI 18.5-30 kg/m <sup>2</sup> | BMI ≥30 kg/m <sup>2</sup> | BMI <18.5 kg/m <sup>2</sup>     | BMI 18.5-30 kg/m <sup>2</sup> | BMI ≥30 kg/m <sup>2</sup> | BMI <18.5 kg/m <sup>2</sup> | BMI 18.5-30 kg/m <sup>2</sup> | BMI ≥30 kg/m <sup>2</sup> |
| <b>Weight</b>                | 0.553 [0.503-0.603]         | 0.598 [0.586-0.610]           | 0.627 [0.602-0.651]       | 1.22 [1.12-1.33]                | 1.44 [1.41-1.47]              | 1.78 [1.68-1.88]          | <0.0001                     | <0.0001                       | <0.0001                   |
| <b>Weight<sup>1.5</sup></b>  | 0.575 [0.527-0.624]         | 0.615 [0.603-0.627]           | 0.634 [0.611-0.658]       | 1.21 [1.13-1.30]                | 1.49 [1.46-1.52]              | 2.05 [1.92-2.19]          | <0.0001                     | <0.0001                       | <0.0001                   |
| <b>Height*Weight</b>         | 0.568 [0.518-0.617]         | 0.607 [0.595-0.619]           | 0.637 [0.612-0.661]       | 1.24 [1.14-1.35]                | 1.46 [1.43-1.50]              | 1.80 [1.70-1.90]          | <0.0001                     | <0.0001                       | <0.0001                   |
| <b>BSA[M]<sup>1.5</sup></b>  | 0.552 [0.502-0.602]         | 0.595 [0.583-0.608]           | 0.630 [0.605-0.654]       | 1.24 [1.13-1.36]                | 1.44 [1.41-1.47]              | 1.70 [1.62-1.79]          | <0.0001                     | <0.0001                       | <0.0001                   |
| <b>BSA[DB]<sup>1.5</sup></b> | 0.552 [0.502-0.602]         | 0.594 [0.582-0.606]           | 0.631 [0.606-0.656]       | 1.25 [1.14-1.37]                | 1.43 [1.40-1.46]              | 1.67 [1.59-1.75]          | <0.0001                     | <0.0001                       | <0.0001                   |
| <b>BSA[M]</b>                | 0.537 [0.486-0.588]         | 0.582 [0.570-0.594]           | 0.621 [0.596-0.646]       | 1.24 [1.12-1.37]                | 1.41 [1.37-1.44]              | 1.62 [1.54-1.70]          | <0.0001                     | <0.0001                       | <0.0001                   |
| <b>BSA[DB]</b>               | 0.537 [0.486-0.588]         | 0.581 [0.569-0.593]           | 0.622 [0.597-0.647]       | 1.25 [1.12-1.39]                | 1.41 [1.37-1.44]              | 1.60 [1.53-1.68]          | <0.0001                     | <0.0001                       | <0.0001                   |
| <b>LBM[H]</b>                | 0.548 [0.498-0.598]         | 0.586 [0.574-0.598]           | 0.629 [0.605-0.654]       | 1.26 [1.13-1.39]                | 1.42 [1.39-1.45]              | 1.63 [1.55-1.71]          | <0.0001                     | <0.0001                       | <0.0001                   |
| <b>LBM[B]</b>                | 0.547 [0.496-0.597]         | 0.584 [0.572-0.596]           | 0.627 [0.603-0.652]       | 1.25 [1.13-1.39]                | 1.41 [1.38-1.45]              | 1.62 [1.54-1.70]          | <0.0001                     | <0.0001                       | <0.0001                   |
| <b>LBM[J]</b>                | 0.548 [0.498-0.598]         | 0.585 [0.572-0.597]           | 0.622 [0.597-0.646]       | 1.23 [1.12-1.36]                | 1.42 [1.39-1.45]              | 1.47 [1.41-1.52]          | <0.0001                     | <0.0001                       | <0.0001                   |
| <b>BMI</b>                   | 0.526 [0.476-0.576]         | 0.577 [0.565-0.589]           | 0.603 [0.578-0.628]       | 1.17 [1.07-1.29]                | 1.38 [1.35-1.41]              | 1.67 [1.57-1.78]          | 0.0005                      | <0.0001                       | <0.0001                   |
| <b>Height<sup>2.7</sup></b>  | 0.548 [0.498-0.599]         | 0.581 [0.569-0.594]           | 0.632 [0.607-0.656]       | 1.32 [1.17-1.49]                | 1.43 [1.40-1.46]              | 1.55 [1.48-1.61]          | <0.0001                     | <0.0001                       | <0.0001                   |
| <b>Height<sup>2.13</sup></b> | 0.540 [0.489-0.590]         | 0.576 [0.564-0.588]           | 0.627 [0.602-0.651]       | 1.31 [1.15-1.48]                | 1.41 [1.38-1.45]              | 1.54 [1.48-1.61]          | <0.0001                     | <0.0001                       | <0.0001                   |
| <b>Height<sup>2</sup></b>    | 0.538 [0.487-0.588]         | 0.575 [0.563-0.587]           | 0.625 [0.600-0.650]       | 1.30 [1.15-1.48]                | 1.41 [1.38-1.44]              | 1.54 [1.48-1.61]          | <0.0001                     | <0.0001                       | <0.0001                   |
| <b>Height<sup>1.5</sup></b>  | 0.530 [0.479-0.581]         | 0.570 [0.558-0.582]           | 0.620 [0.595-0.645]       | 1.29 [1.13-1.46]                | 1.39 [1.36-1.43]              | 1.53 [1.47-1.60]          | 0.0001                      | <0.0001                       | <0.0001                   |
| <b>Height</b>                | 0.524 [0.473-0.575]         | 0.565 [0.553-0.577]           | 0.614 [0.589-0.639]       | 1.27 [1.11-1.45]                | 1.38 [1.34-1.41]              | 1.51 [1.45-1.58]          | 0.0004                      | <0.0001                       | <0.0001                   |
| <b>Unindexed</b>             | 0.512 [0.461-0.563]         | 0.556 [0.544-0.568]           | 0.601 [0.576-0.626]       | 1.24 [1.07-1.42]                | 1.34 [1.30-1.37]              | 1.48 [1.41-1.55]          | 0.0033                      | <0.0001                       | <0.0001                   |

**Supplementary Table 13.** Statistical analyses for 5-year cardiovascular mortality for LV mass indexed by different metrics.

BSA = body surface area, [M] = Mosteller, [DB] = Du Bois, LBM = lean body mass, [H] = Hume, [B] = Boer, [J] = James, BMI = body mass index.

|                              | C statistic                 |                               |                           | Hazard Ratio per 1 SD increment |                               |                           | p value                     |                               |                           |
|------------------------------|-----------------------------|-------------------------------|---------------------------|---------------------------------|-------------------------------|---------------------------|-----------------------------|-------------------------------|---------------------------|
|                              | BMI <18.5 kg/m <sup>2</sup> | BMI 18.5-30 kg/m <sup>2</sup> | BMI ≥30 kg/m <sup>2</sup> | BMI <18.5 kg/m <sup>2</sup>     | BMI 18.5-30 kg/m <sup>2</sup> | BMI ≥30 kg/m <sup>2</sup> | BMI <18.5 kg/m <sup>2</sup> | BMI 18.5-30 kg/m <sup>2</sup> | BMI ≥30 kg/m <sup>2</sup> |
| <b>Weight</b>                | 0.697 [0.677-0.717]         | 0.723 [0.718-0.728]           | 0.664 [0.655-0.674]       | 1.42 [1.37-1.47]                | 1.77 [1.75-1.80]              | 1.83 [1.77-1.88]          | <0.0001                     | <0.0001                       | <0.0001                   |
| <b>Weight<sup>1.5</sup></b>  | 0.686 [0.667-0.706]         | 0.728 [0.723-0.732]           | 0.660 [0.651-0.670]       | 1.25 [1.22-1.29]                | 1.77 [1.75-1.79]              | 1.97 [1.91-2.04]          | <0.0001                     | <0.0001                       | <0.0001                   |
| <b>Height*Weight</b>         | 0.701 [0.682-0.721]         | 0.728 [0.723-0.733]           | 0.670 [0.661-0.679]       | 1.42 [1.37-1.47]                | 1.74 [1.72-1.76]              | 1.69 [1.66-1.73]          | <0.0001                     | <0.0001                       | <0.0001                   |
| <b>BSA[M]<sup>1.5</sup></b>  | 0.707 [0.687-0.727]         | 0.722 [0.717-0.727]           | 0.670 [0.661-0.679]       | 1.53 [1.47-1.59]                | 1.77 [1.75-1.79]              | 1.74 [1.69-1.79]          | <0.0001                     | <0.0001                       | <0.0001                   |
| <b>BSA[DB]<sup>1.5</sup></b> | 0.711 [0.691-0.731]         | 0.721 [0.716-0.726]           | 0.671 [0.662-0.681]       | 1.58 [1.51-1.65]                | 1.77 [1.75-1.79]              | 1.70 [1.65-1.74]          | <0.0001                     | <0.0001                       | <0.0001                   |
| <b>BSA[M]</b>                | 0.709 [0.689-0.730]         | 0.710 [0.705-0.715]           | 0.665 [0.655-0.674]       | 1.66 [1.59-1.74]                | 1.77 [1.75-1.80]              | 1.68 [1.64-1.73]          | <0.0001                     | <0.0001                       | <0.0001                   |
| <b>BSA[DB]</b>               | 0.712 [0.691-0.732]         | 0.709 [0.704-0.714]           | 0.666 [0.657-0.675]       | 1.71 [1.63-1.79]                | 1.78 [1.76-1.80]              | 1.67 [1.63-1.72]          | <0.0001                     | <0.0001                       | <0.0001                   |
| <b>LBM[H]</b>                | 0.719 [0.698-0.739]         | 0.715 [0.710-0.720]           | 0.669 [0.660-0.678]       | 1.67 [1.60-1.74]                | 1.75 [1.73-1.77]              | 1.63 [1.59-1.67]          | <0.0001                     | <0.0001                       | <0.0001                   |
| <b>LBM[B]</b>                | 0.719 [0.698-0.739]         | 0.712 [0.707-0.717]           | 0.662 [0.653-0.671]       | 1.67 [1.60-1.75]                | 1.73 [1.71-1.75]              | 1.60 [1.56-1.64]          | <0.0001                     | <0.0001                       | <0.0001                   |
| <b>LBM[J]</b>                | 0.703 [0.682-0.723]         | 0.714 [0.709-0.719]           | 0.659 [0.650-0.668]       | 1.59 [1.52-1.66]                | 1.82 [1.80-1.85]              | 1.09 [1.08-1.09]          | <0.0001                     | <0.0001                       | <0.0001                   |
| <b>BMI</b>                   | 0.678 [0.657-0.698]         | 0.693 [0.688-0.698]           | 0.637 [0.627-0.646]       | 1.38 [1.33-1.44]                | 1.72 [1.69-1.74]              | 1.68 [1.63-1.74]          | <0.0001                     | <0.0001                       | <0.0001                   |
| <b>Height<sup>2.7</sup></b>  | 0.726 [0.706-0.747]         | 0.706 [0.701-0.711]           | 0.672 [0.663-0.681]       | 1.99 [1.88-2.11]                | 1.82 [1.80-1.85]              | 1.46 [1.44-1.49]          | <0.0001                     | <0.0001                       | <0.0001                   |
| <b>Height<sup>2.13</sup></b> | 0.724 [0.704-0.745]         | 0.702 [0.697-0.707]           | 0.669 [0.660-0.678]       | 2.03 [1.91-2.15]                | 1.83 [1.80-1.85]              | 1.55 [1.52-1.59]          | <0.0001                     | <0.0001                       | <0.0001                   |
| <b>Height<sup>2</sup></b>    | 0.724 [0.703-0.744]         | 0.701 [0.696-0.706]           | 0.668 [0.659-0.677]       | 2.04 [1.92-2.16]                | 1.83 [1.80-1.85]              | 1.56 [1.53-1.60]          | <0.0001                     | <0.0001                       | <0.0001                   |
| <b>Height<sup>1.5</sup></b>  | 0.720 [0.699-0.740]         | 0.695 [0.690-0.700]           | 0.663 [0.654-0.672]       | 2.05 [1.93-2.18]                | 1.81 [1.79-1.84]              | 1.59 [1.55-1.63]          | <0.0001                     | <0.0001                       | <0.0001                   |
| <b>Height</b>                | 0.715 [0.694-0.736]         | 0.688 [0.683-0.693]           | 0.657 [0.648-0.666]       | 2.06 [1.93-2.19]                | 1.79 [1.76-1.82]              | 1.58 [1.54-1.62]          | <0.0001                     | <0.0001                       | <0.0001                   |
| <b>Unindexed</b>             | 0.702 [0.681-0.723]         | 0.670 [0.665-0.676]           | 0.641 [0.632-0.651]       | 2.02 [1.89-2.15]                | 1.72 [1.69-1.74]              | 1.52 [1.48-1.56]          | <0.0001                     | <0.0001                       | <0.0001                   |



**Supplementary Table 14.** Statistical analyses for 5-year cardiovascular mortality for RA area indexed by different metrics.

BSA = body surface area, [M] = Mosteller, [DB] = Du Bois, LBM = lean body mass, [H] = Hume, [B] = Boer, [J] = James, BMI = body mass index.

|                              | C statistic                 |                               |                           | Hazard Ratio per 1 SD increment |                               |                           | p value                     |                               |                           |
|------------------------------|-----------------------------|-------------------------------|---------------------------|---------------------------------|-------------------------------|---------------------------|-----------------------------|-------------------------------|---------------------------|
|                              | BMI <18.5 kg/m <sup>2</sup> | BMI 18.5-30 kg/m <sup>2</sup> | BMI ≥30 kg/m <sup>2</sup> | BMI <18.5 kg/m <sup>2</sup>     | BMI 18.5-30 kg/m <sup>2</sup> | BMI ≥30 kg/m <sup>2</sup> | BMI <18.5 kg/m <sup>2</sup> | BMI 18.5-30 kg/m <sup>2</sup> | BMI ≥30 kg/m <sup>2</sup> |
| <b>Weight</b>                | 0.704 [0.666-0.742]         | 0.668 [0.658-0.679]           | 0.591 [0.574-0.608]       | 1.42 [1.33-1.50]                | 1.64 [1.61-1.68]              | 1.61 [1.52-1.71]          | <0.0001                     | <0.0001                       | <0.0001                   |
| <b>Weight<sup>1.5</sup></b>  | 0.708 [0.671-0.746]         | 0.671 [0.661-0.681]           | 0.589 [0.573-0.606]       | 1.37 [1.29-1.44]                | 1.63 [1.60-1.67]              | 1.75 [1.63-1.88]          | <0.0001                     | <0.0001                       | <0.0001                   |
| <b>Height*Weight</b>         | 0.705 [0.667-0.743]         | 0.672 [0.662-0.682]           | 0.593 [0.576-0.610]       | 1.40 [1.32-1.48]                | 1.63 [1.60-1.67]              | 1.61 [1.52-1.70]          | <0.0001                     | <0.0001                       | <0.0001                   |
| <b>BSA[M]<sup>1.5</sup></b>  | 0.702 [0.664-0.740]         | 0.669 [0.659-0.679]           | 0.593 [0.576-0.610]       | 1.44 [1.35-1.53]                | 1.64 [1.60-1.68]              | 1.56 [1.48-1.65]          | <0.0001                     | <0.0001                       | <0.0001                   |
| <b>BSA[DB]<sup>1.5</sup></b> | 0.701 [0.662-0.739]         | 0.669 [0.658-0.679]           | 0.594 [0.577-0.610]       | 1.45 [1.36-1.54]                | 1.64 [1.60-1.67]              | 1.54 [1.46-1.62]          | <0.0001                     | <0.0001                       | <0.0001                   |
| <b>BSA[M]</b>                | 0.695 [0.656-0.734]         | 0.661 [0.651-0.672]           | 0.591 [0.575-0.608]       | 1.49 [1.39-1.60]                | 1.63 [1.60-1.67]              | 1.51 [1.44-1.59]          | <0.0001                     | <0.0001                       | <0.0001                   |
| <b>BSA[DB]</b>               | 0.695 [0.655-0.734]         | 0.661 [0.651-0.671]           | 0.592 [0.575-0.608]       | 1.50 [1.40-1.61]                | 1.64 [1.60-1.67]              | 1.50 [1.43-1.58]          | <0.0001                     | <0.0001                       | <0.0001                   |
| <b>LBM[H]</b>                | 0.694 [0.655-0.733]         | 0.663 [0.652-0.673]           | 0.588 [0.572-0.605]       | 1.47 [1.37-1.57]                | 1.63 [1.59-1.66]              | 1.49 [1.41-1.57]          | <0.0001                     | <0.0001                       | <0.0001                   |
| <b>LBM[B]</b>                | 0.695 [0.656-0.734]         | 0.659 [0.649-0.669]           | 0.579 [0.562-0.595]       | 1.47 [1.38-1.58]                | 1.62 [1.58-1.66]              | 1.43 [1.36-1.50]          | <0.0001                     | <0.0001                       | <0.0001                   |
| <b>LBM[J]</b>                | 0.697 [0.658-0.735]         | 0.660 [0.649-0.670]           | 0.577 [0.560-0.593]       | 1.47 [1.37-1.57]                | 1.66 [1.62-1.70]              | 1.15 [1.12-1.17]          | <0.0001                     | <0.0001                       | <0.0001                   |
| <b>BMI</b>                   | 0.687 [0.647-0.727]         | 0.647 [0.637-0.658]           | 0.579 [0.563-0.596]       | 1.45 [1.35-1.55]                | 1.60 [1.57-1.64]              | 1.52 [1.43-1.62]          | <0.0001                     | <0.0001                       | <0.0001                   |
| <b>Height<sup>2.7</sup></b>  | 0.692 [0.653-0.731]         | 0.662 [0.652-0.672]           | 0.594 [0.578-0.611]       | 1.60 [1.47-1.74]                | 1.67 [1.63-1.71]              | 1.43 [1.37-1.50]          | <0.0001                     | <0.0001                       | <0.0001                   |
| <b>Height<sup>2.13</sup></b> | 0.690 [0.651-0.730]         | 0.659 [0.648-0.669]           | 0.593 [0.577-0.610]       | 1.62 [1.48-1.76]                | 1.67 [1.63-1.71]              | 1.45 [1.38-1.52]          | <0.0001                     | <0.0001                       | <0.0001                   |
| <b>Height<sup>2</sup></b>    | 0.690 [0.650-0.729]         | 0.658 [0.647-0.668]           | 0.593 [0.577-0.609]       | 1.62 [1.49-1.77]                | 1.66 [1.62-1.70]              | 1.45 [1.38-1.52]          | <0.0001                     | <0.0001                       | <0.0001                   |
| <b>Height<sup>1.5</sup></b>  | 0.687 [0.647-0.727]         | 0.653 [0.643-0.664]           | 0.591 [0.575-0.608]       | 1.63 [1.50-1.79]                | 1.65 [1.61-1.69]              | 1.45 [1.38-1.52]          | <0.0001                     | <0.0001                       | <0.0001                   |
| <b>Height</b>                | 0.683 [0.643-0.723]         | 0.648 [0.638-0.658]           | 0.589 [0.572-0.605]       | 1.65 [1.50-1.81]                | 1.64 [1.60-1.68]              | 1.44 [1.37-1.51]          | <0.0001                     | <0.0001                       | <0.0001                   |
| <b>Unindexed</b>             | 0.672 [0.630-0.713]         | 0.635 [0.625-0.645]           | 0.582 [0.565-0.598]       | 1.68 [1.52-1.85]                | 1.59 [1.55-1.63]              | 1.40 [1.34-1.47]          | <0.0001                     | <0.0001                       | <0.0001                   |

**Supplementary Table 15.** Statistical analyses for 5-year cardiovascular mortality for RV diameter indexed by different metrics.

BSA = body surface area, [M] = Mosteller, [DB] = Du Bois, LBM = lean body mass, [H] = Hume, [B] = Boer, [J] = James, BMI = body mass index.

|                              | C statistic                 |                               |                           | Hazard Ratio per 1 SD increment |                               |                           | p value                     |                               |                           |
|------------------------------|-----------------------------|-------------------------------|---------------------------|---------------------------------|-------------------------------|---------------------------|-----------------------------|-------------------------------|---------------------------|
|                              | BMI <18.5 kg/m <sup>2</sup> | BMI 18.5-30 kg/m <sup>2</sup> | BMI ≥30 kg/m <sup>2</sup> | BMI <18.5 kg/m <sup>2</sup>     | BMI 18.5-30 kg/m <sup>2</sup> | BMI ≥30 kg/m <sup>2</sup> | BMI <18.5 kg/m <sup>2</sup> | BMI 18.5-30 kg/m <sup>2</sup> | BMI ≥30 kg/m <sup>2</sup> |
| <b>Weight</b>                | 0.599 [0.481-0.717]         | 0.652 [0.613-0.691]           | 0.656 [0.597-0.714]       | 1.04 [0.79-1.38]                | 1.64 [1.49-1.82]              | 2.29 [1.71-3.07]          | 0.77                        | <0.0001                       | <0.0001                   |
| <b>Weight<sup>1.5</sup></b>  | 0.424 [0.310-0.539]         | 0.644 [0.605-0.682]           | 0.643 [0.584-0.703]       | 0.96 [0.75-1.23]                | 1.68 [1.50-1.88]              | 2.70 [1.80-4.04]          | 0.76                        | <0.0001                       | <0.0001                   |
| <b>Height*Weight</b>         | 0.594 [0.475-0.713]         | 0.650 [0.611-0.688]           | 0.652 [0.593-0.710]       | 1.05 [0.79-1.40]                | 1.60 [1.45-1.78]              | 2.11 [1.59-2.81]          | 0.75                        | <0.0001                       | <0.0001                   |
| <b>BSA[M]<sup>1.5</sup></b>  | 0.609 [0.488-0.731]         | 0.654 [0.615-0.693]           | 0.659 [0.601-0.717]       | 1.13 [0.82-1.54]                | 1.60 [1.45-1.76]              | 2.02 [1.58-2.59]          | 0.46                        | <0.0001                       | <0.0001                   |
| <b>BSA[DB]<sup>1.5</sup></b> | 0.611 [0.488-0.734]         | 0.653 [0.614-0.692]           | 0.660 [0.602-0.718]       | 1.18 [0.84-1.64]                | 1.58 [1.44-1.74]              | 1.92 [1.53-2.42]          | 0.34                        | <0.0001                       | <0.0001                   |
| <b>BSA[M]</b>                | 0.613 [0.487-0.738]         | 0.650 [0.610-0.690]           | 0.666 [0.609-0.723]       | 1.24 [0.88-1.76]                | 1.58 [1.44-1.73]              | 1.89 [1.53-2.33]          | 0.23                        | <0.0001                       | <0.0001                   |
| <b>BSA[DB]</b>               | 0.617 [0.493-0.741]         | 0.650 [0.610-0.690]           | 0.668 [0.611-0.724]       | 1.29 [0.90-1.85]                | 1.57 [1.43-1.72]              | 1.84 [1.50-2.25]          | 0.17                        | <0.0001                       | <0.0001                   |
| <b>LBM[H]</b>                | 0.623 [0.496-0.751]         | 0.644 [0.604-0.684]           | 0.655 [0.597-0.712]       | 1.37 [0.93-2.01]                | 1.55 [1.41-1.71]              | 1.76 [1.43-2.17]          | 0.11                        | <0.0001                       | <0.0001                   |
| <b>LBM[B]</b>                | 0.621 [0.492-0.751]         | 0.636 [0.597-0.676]           | 0.636 [0.577-0.694]       | 1.40 [0.94-2.08]                | 1.54 [1.39-1.70]              | 1.61 [1.31-1.97]          | 0.10                        | <0.0001                       | <0.0001                   |
| <b>LBM[J]</b>                | 0.606 [0.482-0.730]         | 0.637 [0.597-0.677]           | 0.635 [0.577-0.692]       | 1.13 [0.83-1.54]                | 1.57 [1.41-1.74]              | 1.47 [1.22-1.78]          | 0.45                        | <0.0001                       | <0.0001                   |
| <b>BMI</b>                   | 0.566 [0.431-0.702]         | 0.632 [0.592-0.673]           | 0.646 [0.586-0.705]       | 1.02 [0.77-1.36]                | 1.64 [1.47-1.82]              | 2.15 [1.62-2.85]          | 0.88                        | <0.0001                       | <0.0001                   |
| <b>Height<sup>2.7</sup></b>  | 0.657 [0.532-0.782]         | 0.642 [0.603-0.681]           | 0.662 [0.605-0.718]       | 1.67 [1.06-2.63]                | 1.57 [1.41-1.75]              | 1.57 [1.33-1.86]          | 0.028                       | <0.0001                       | <0.0001                   |
| <b>Height<sup>2.13</sup></b> | 0.666 [0.542-0.791]         | 0.642 [0.602-0.682]           | 0.666 [0.609-0.722]       | 1.66 [1.07-2.57]                | 1.58 [1.42-1.75]              | 1.62 [1.37-1.91]          | 0.025                       | <0.0001                       | <0.0001                   |
| <b>Height<sup>2</sup></b>    | 0.668 [0.544-0.792]         | 0.642 [0.602-0.682]           | 0.667 [0.611-0.724]       | 1.65 [1.07-2.56]                | 1.58 [1.42-1.75]              | 1.62 [1.37-1.92]          | 0.024                       | <0.0001                       | <0.0001                   |
| <b>Height<sup>1.5</sup></b>  | 0.668 [0.544-0.792]         | 0.640 [0.599-0.680]           | 0.669 [0.612-0.727]       | 1.63 [1.07-2.51]                | 1.57 [1.42-1.74]              | 1.65 [1.39-1.95]          | 0.024                       | <0.0001                       | <0.0001                   |
| <b>Height</b>                | 0.665 [0.536-0.793]         | 0.634 [0.593-0.675]           | 0.670 [0.612-0.728]       | 1.62 [1.06-2.47]                | 1.56 [1.41-1.73]              | 1.65 [1.40-1.96]          | 0.026                       | <0.0001                       | <0.0001                   |
| <b>Unindexed</b>             | 0.650 [0.510-0.790]         | 0.617 [0.576-0.659]           | 0.666 [0.606-0.725]       | 1.58 [1.02-2.43]                | 1.53 [1.37-1.70]              | 1.61 [1.36-1.89]          | 0.039                       | <0.0001                       | <0.0001                   |
